# Supplementary material for: FilTar: Using RNA-Seq data to improve microRNA target prediction accuracy in animals
Source: bioRxiv or medRxiv preprint supplement (doi:10.1101/595322), 2019-04-01

# miR-137-3p transfection (U251)

$p \approx 7.46e-29$

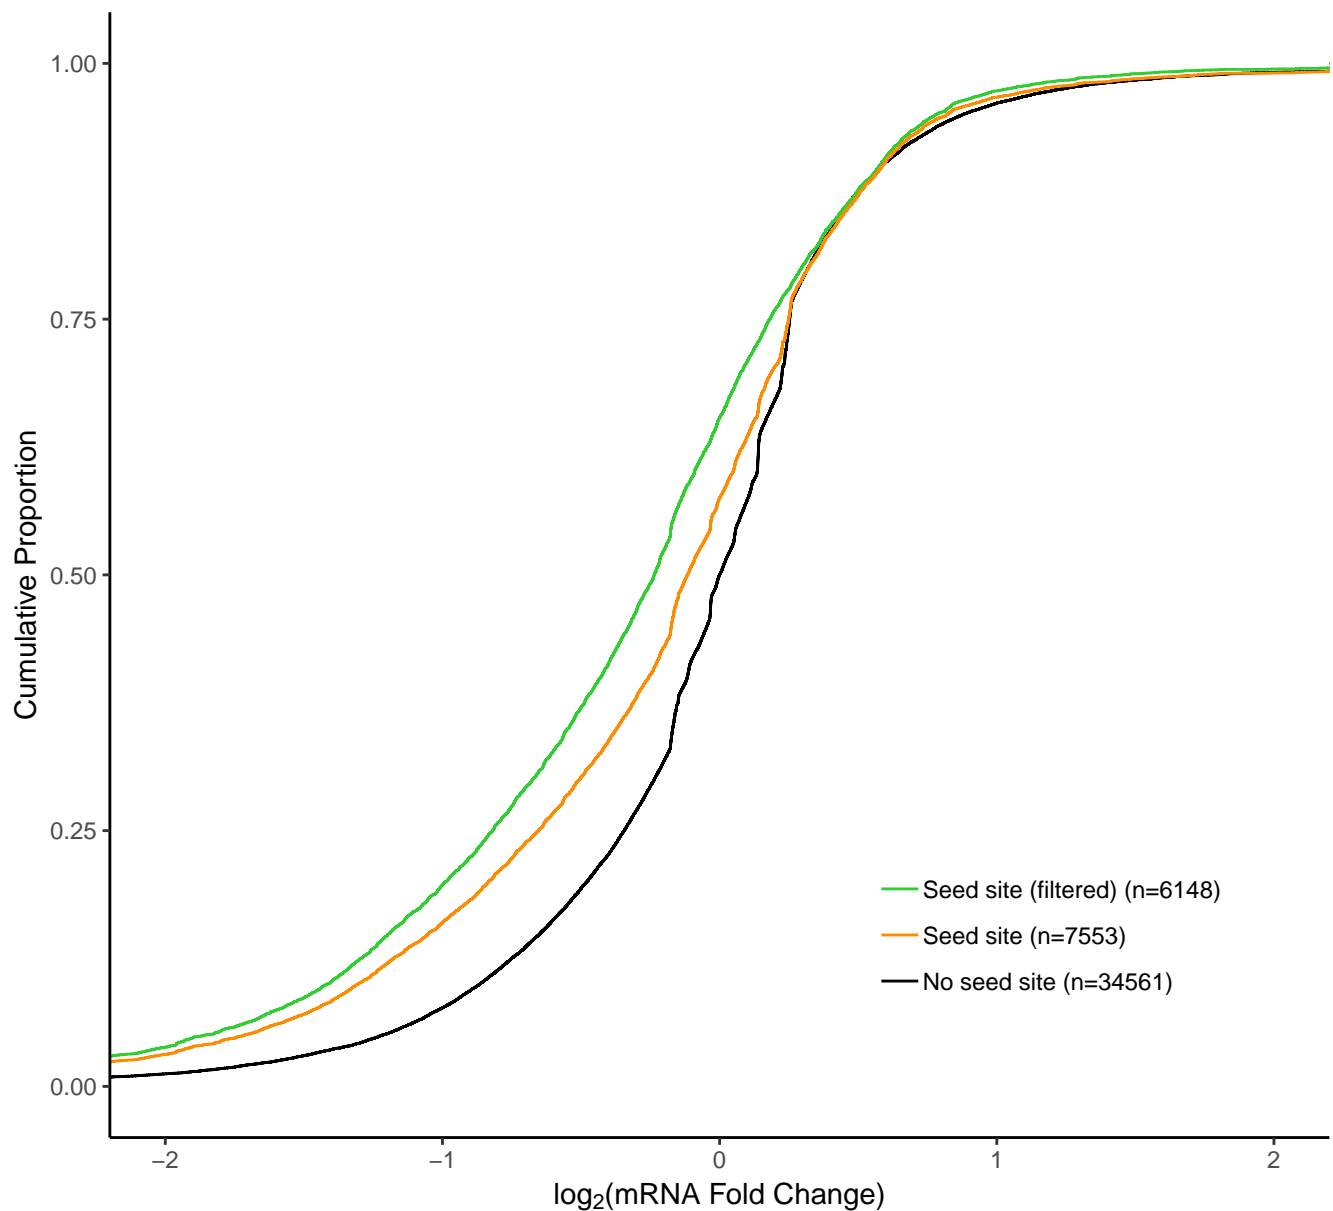

# miR-137-3p transfection (U343)

$p \approx 3.45e-34$

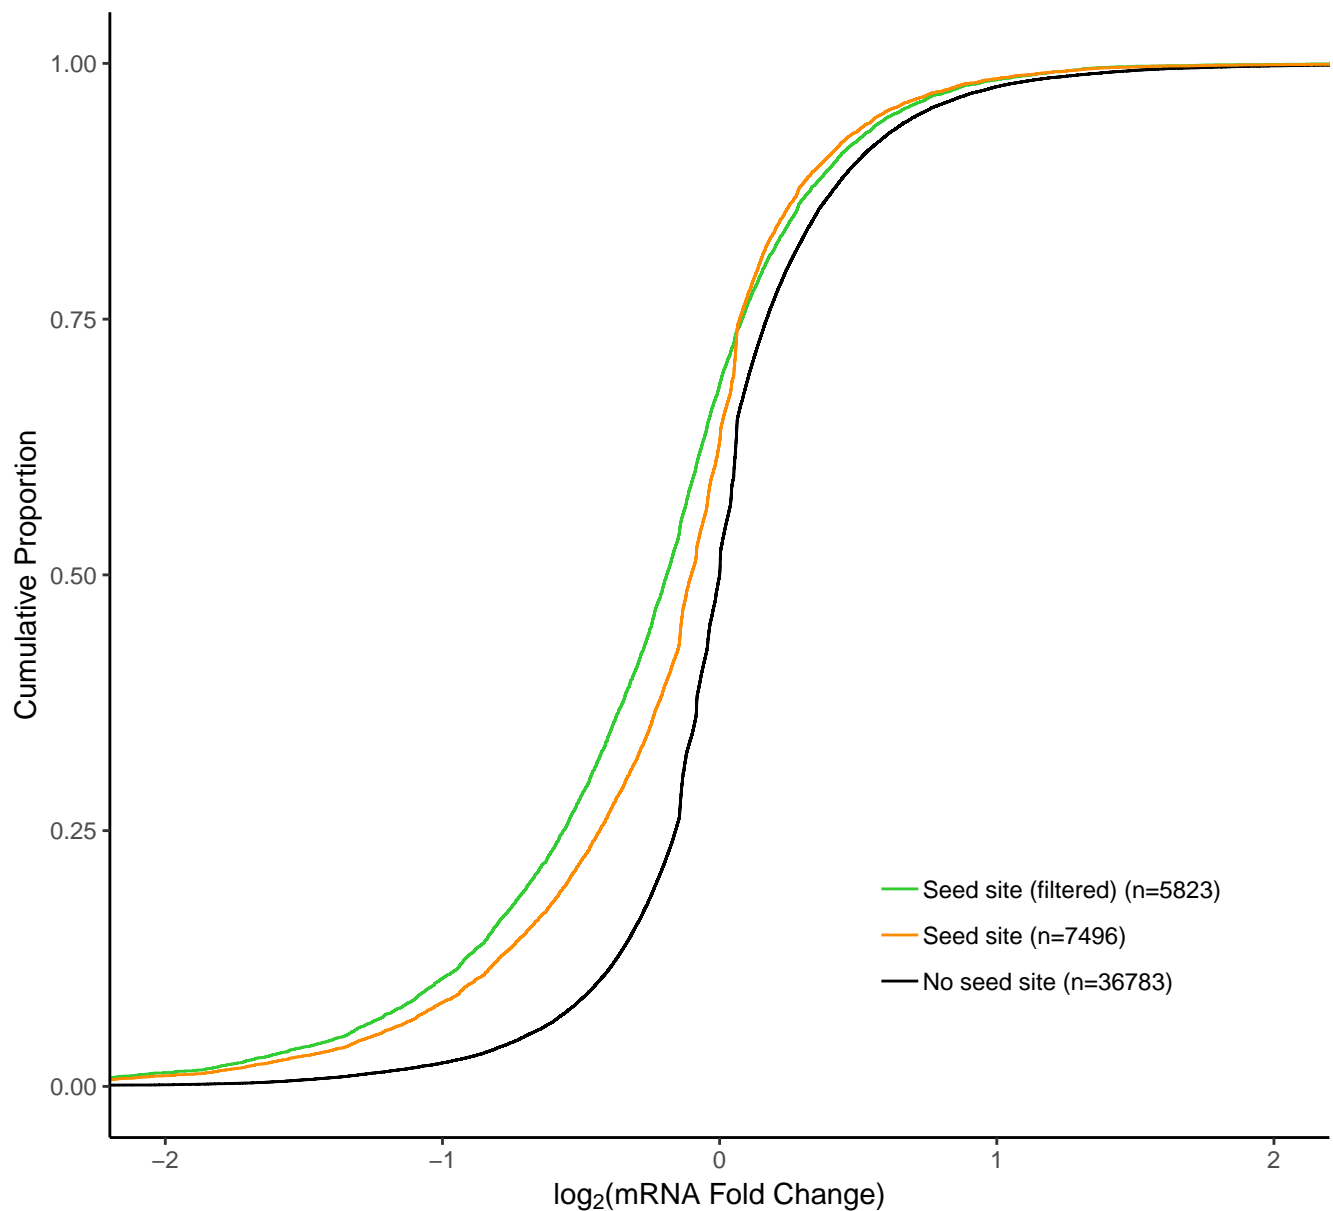

# miR-141-3p transfection (Du145)

$p \approx 1.09e-25$

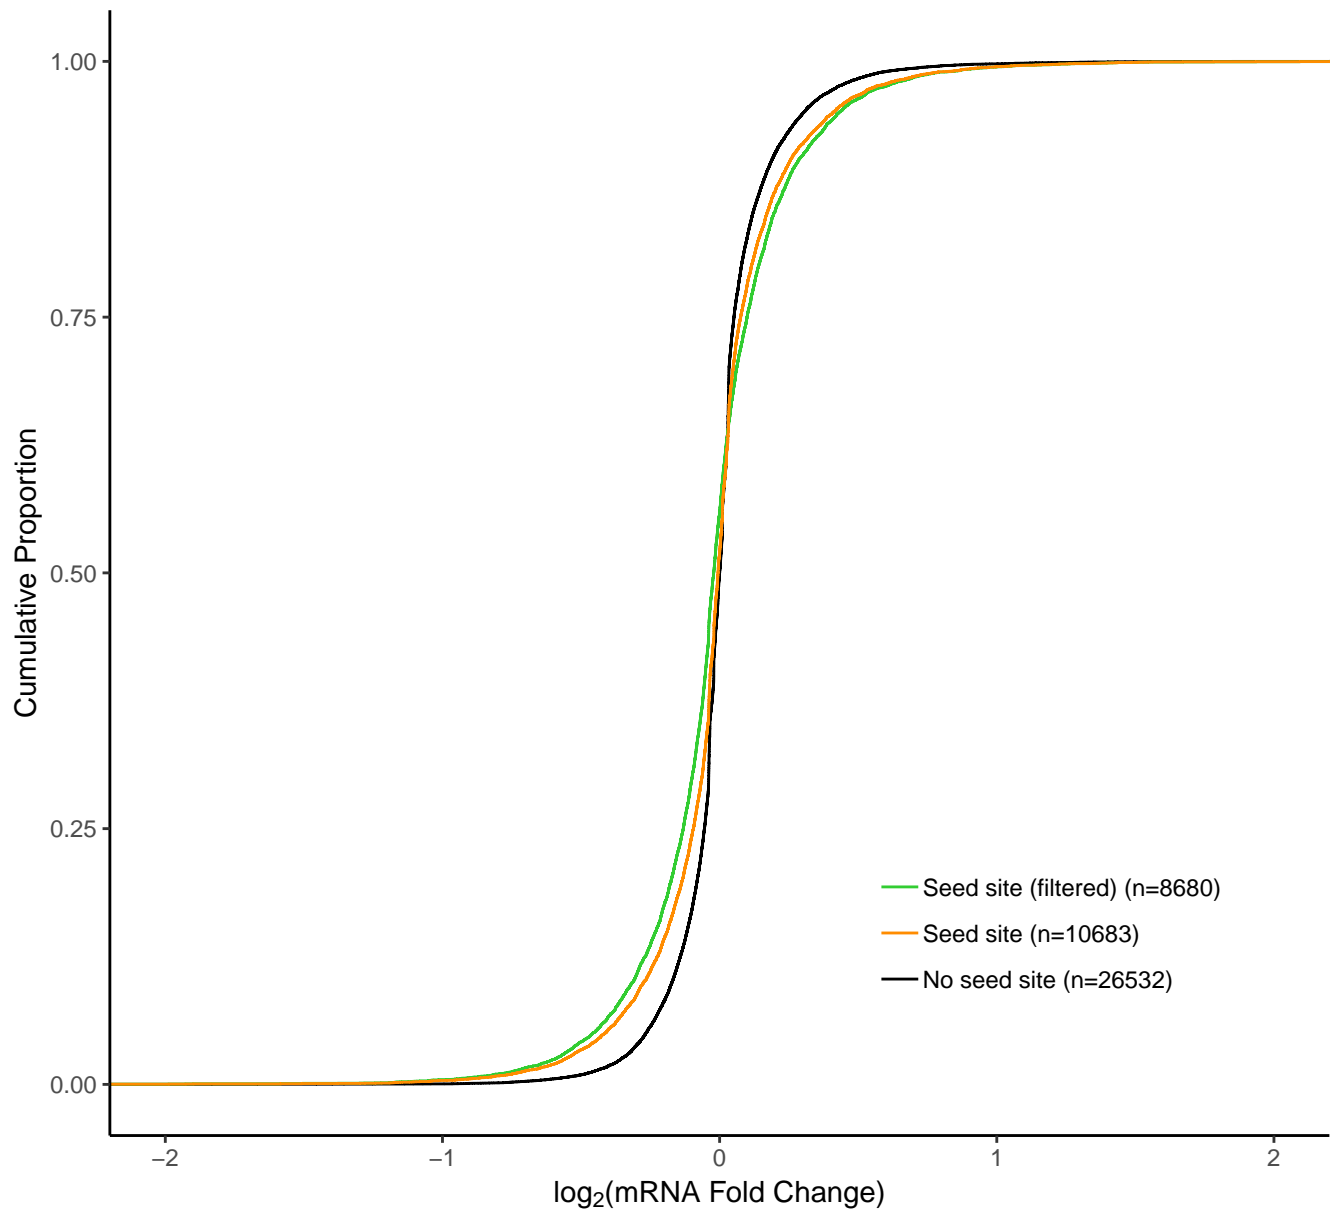

# miR-1343-3p transfection (16HBE14o)

$p \approx 5.29e-23$

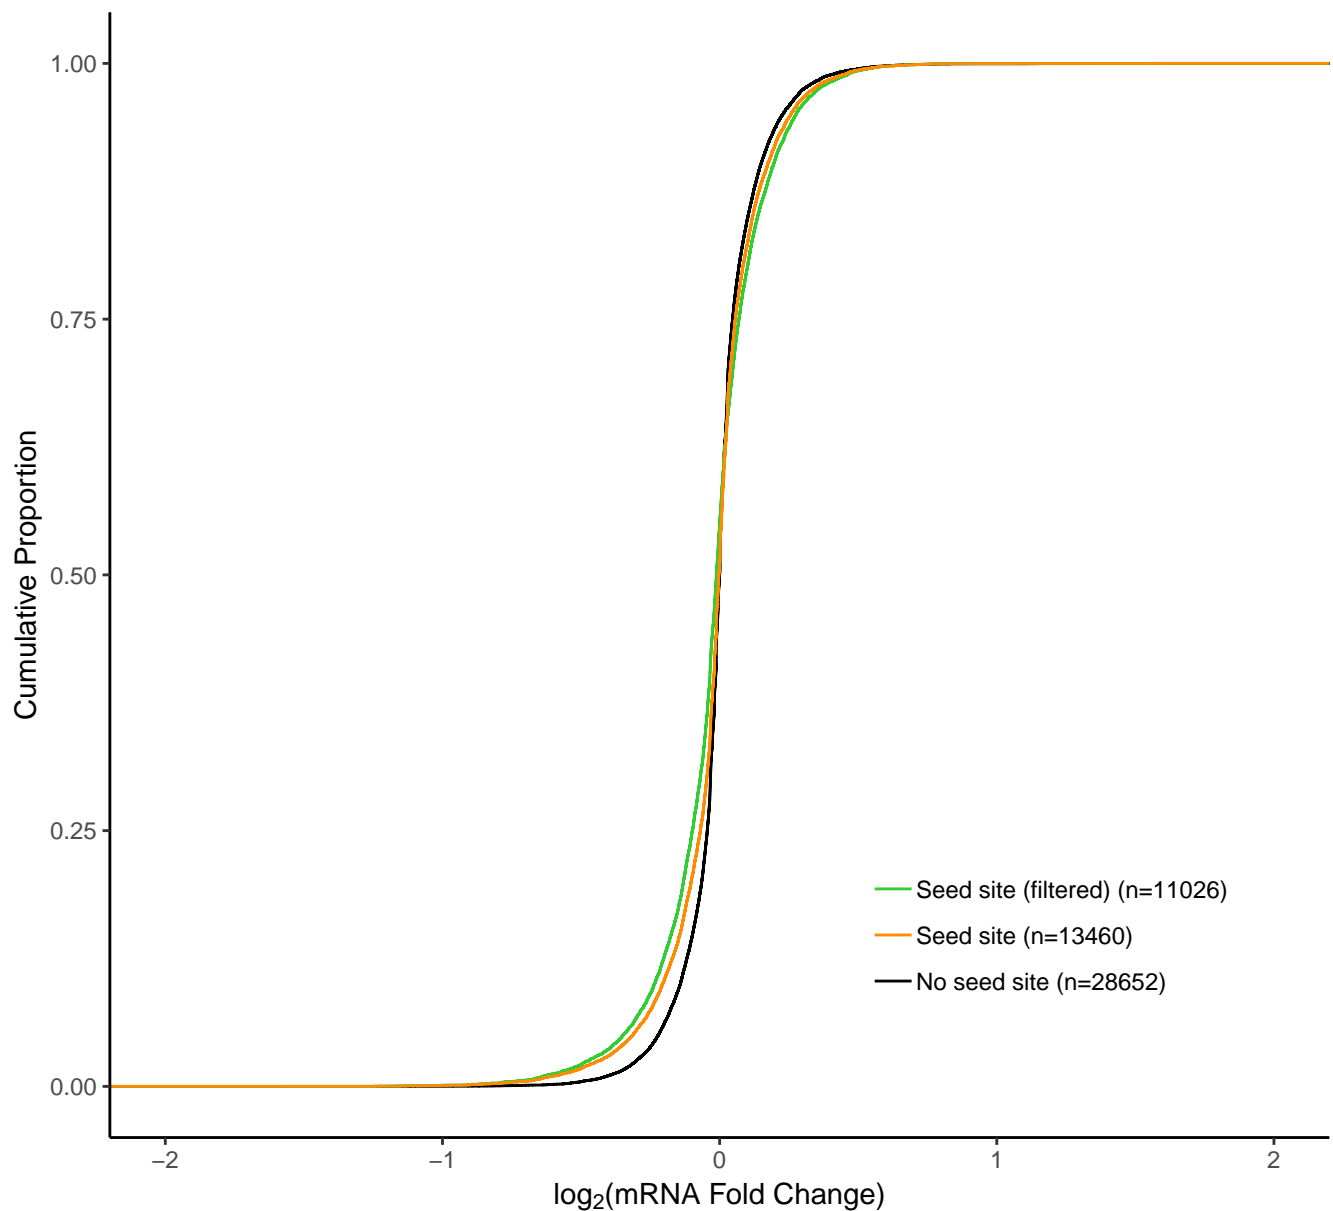

# miR-155-5p transfection (U2OS)

$p \approx 4.88e-16$

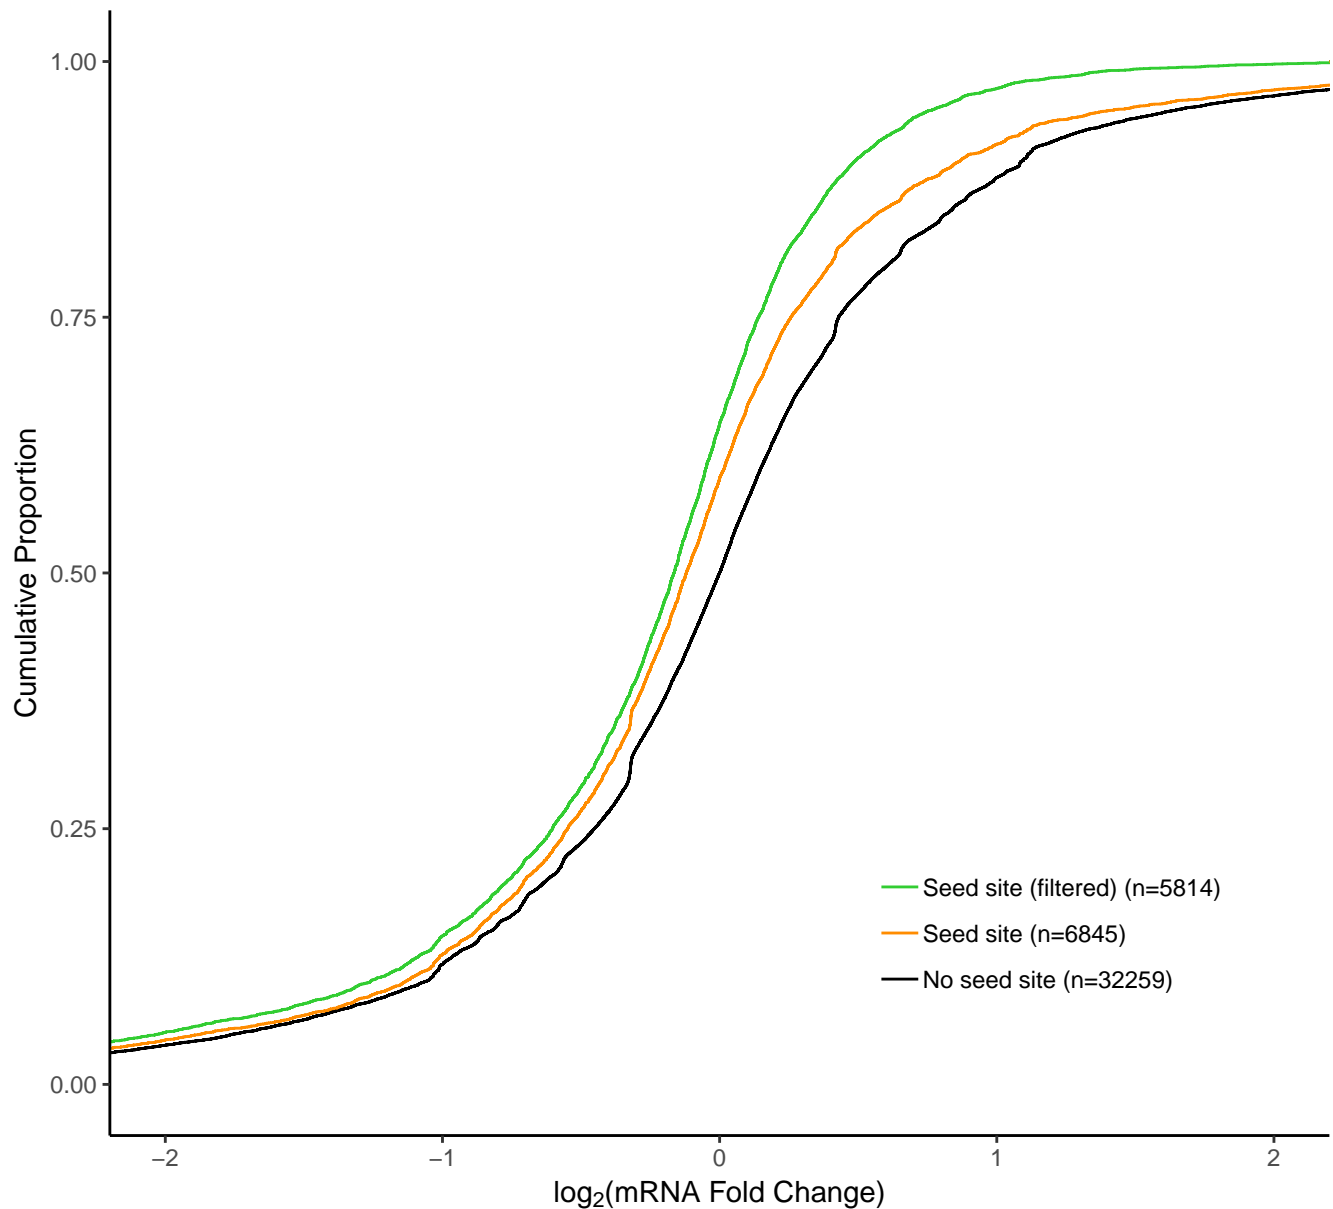

# miR-1-3p transfection (U2OS)

$p \approx 1.96e-22$

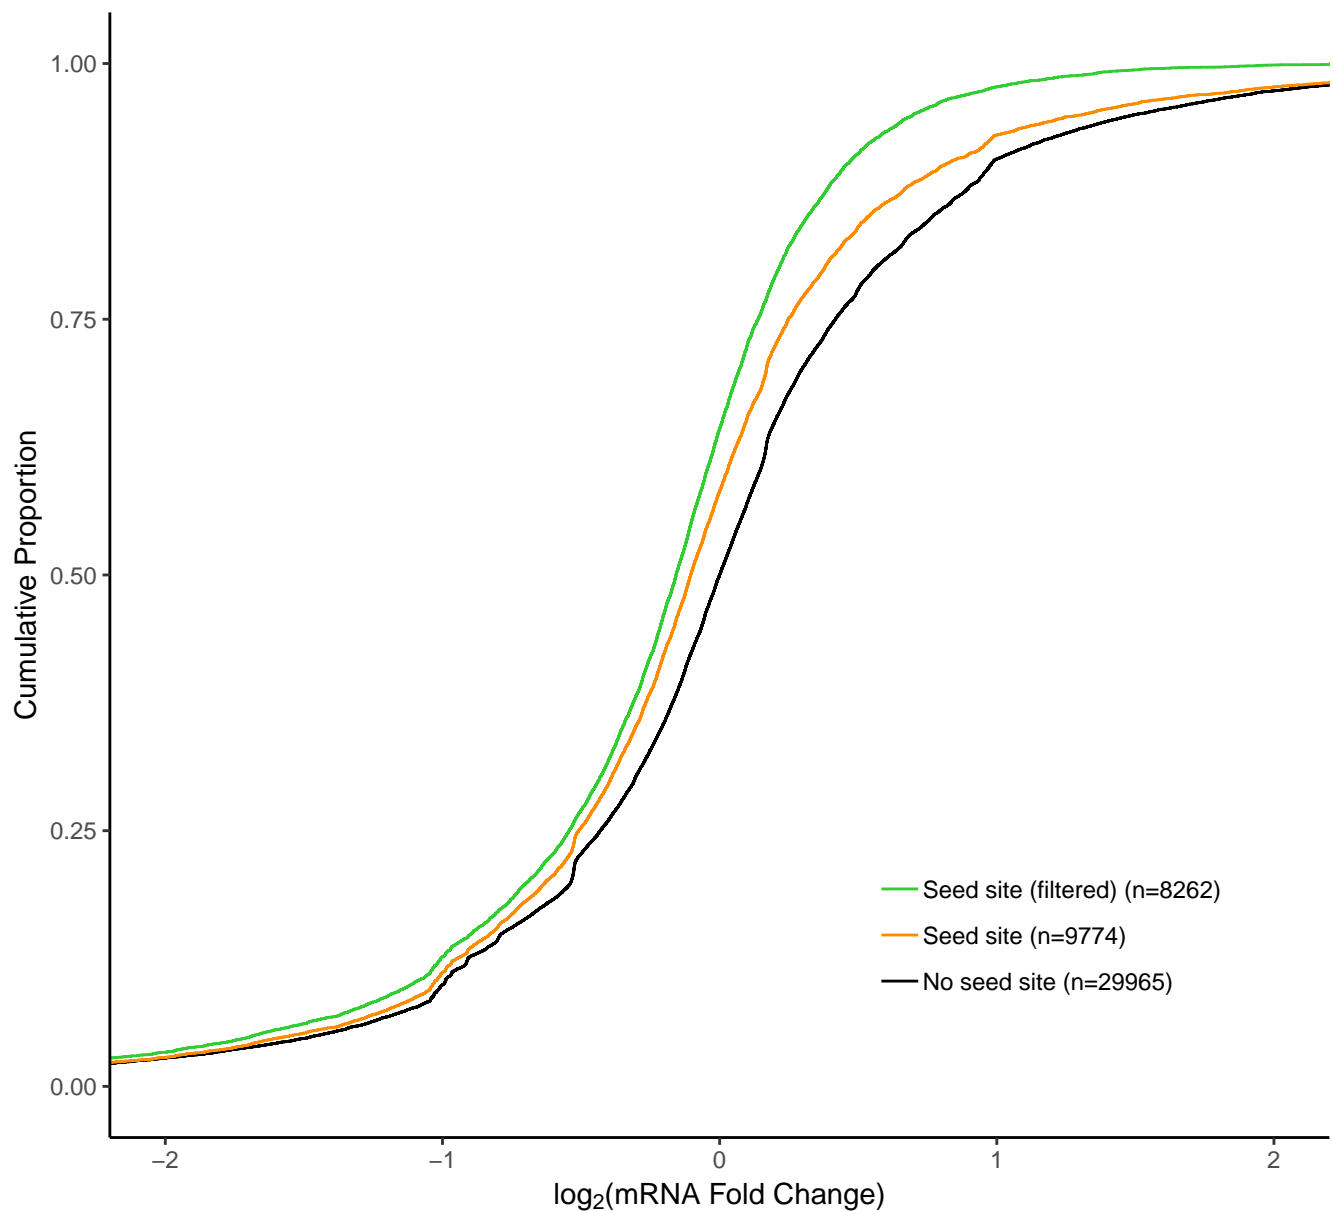

# miR-200b-3p transfection (NMuMG)

$p \approx 3.15e-38$

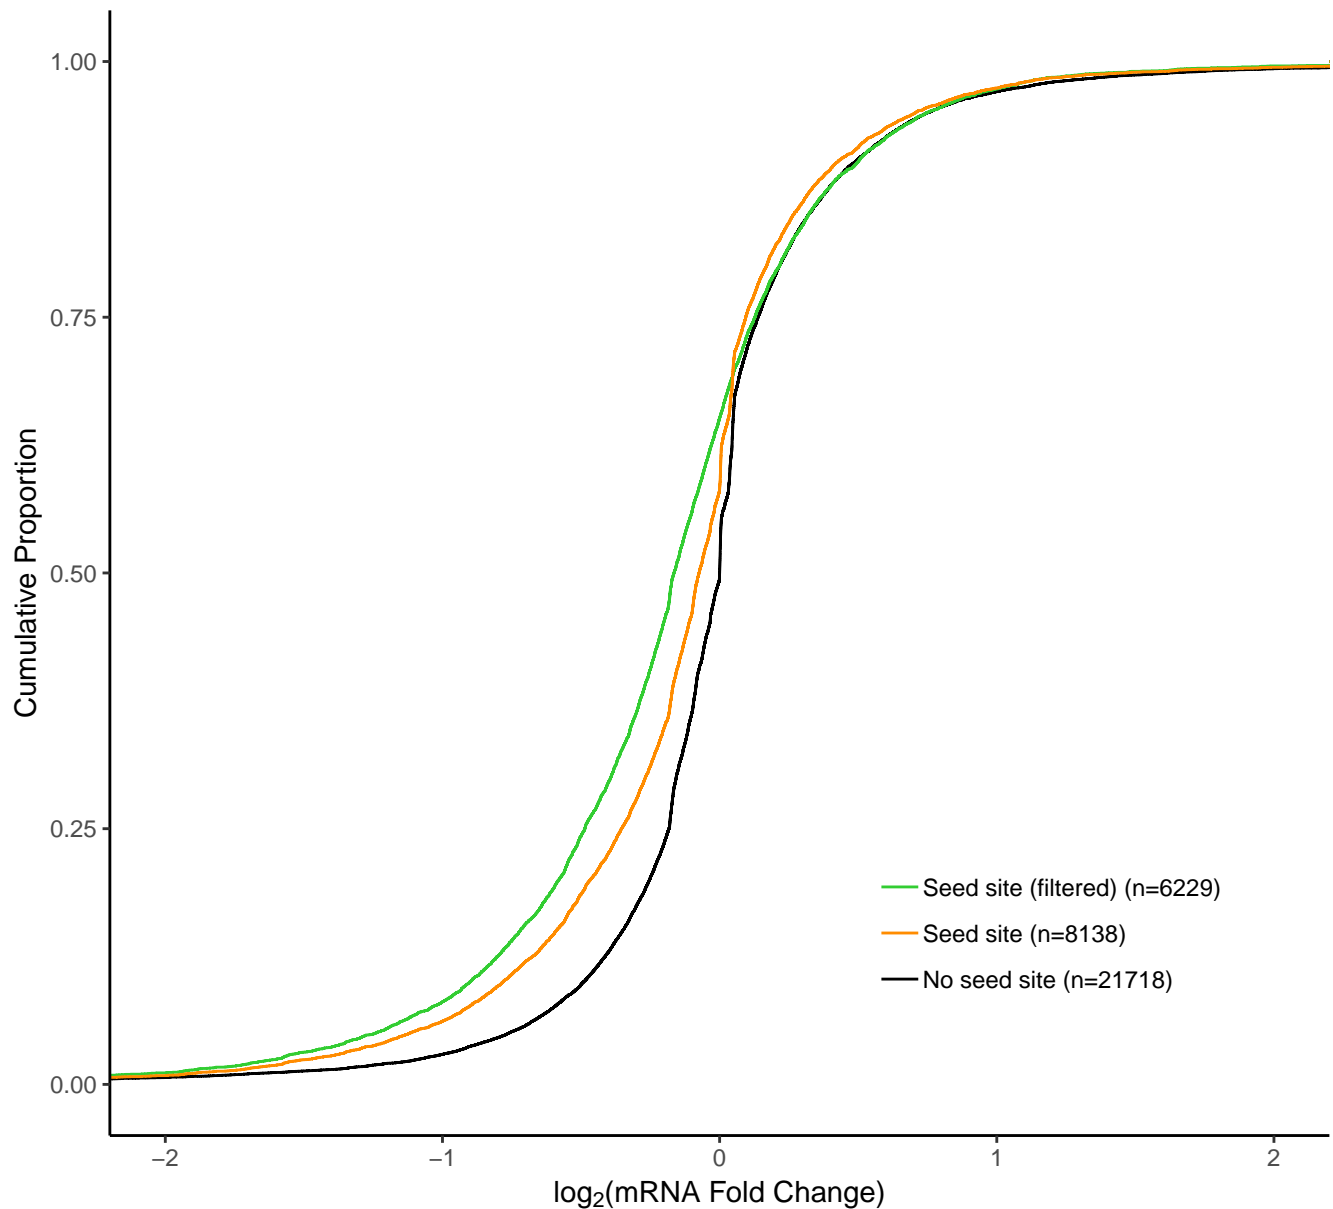

# miR-429-3p transfection (NMuMG)

$p \approx 9.57e-33$

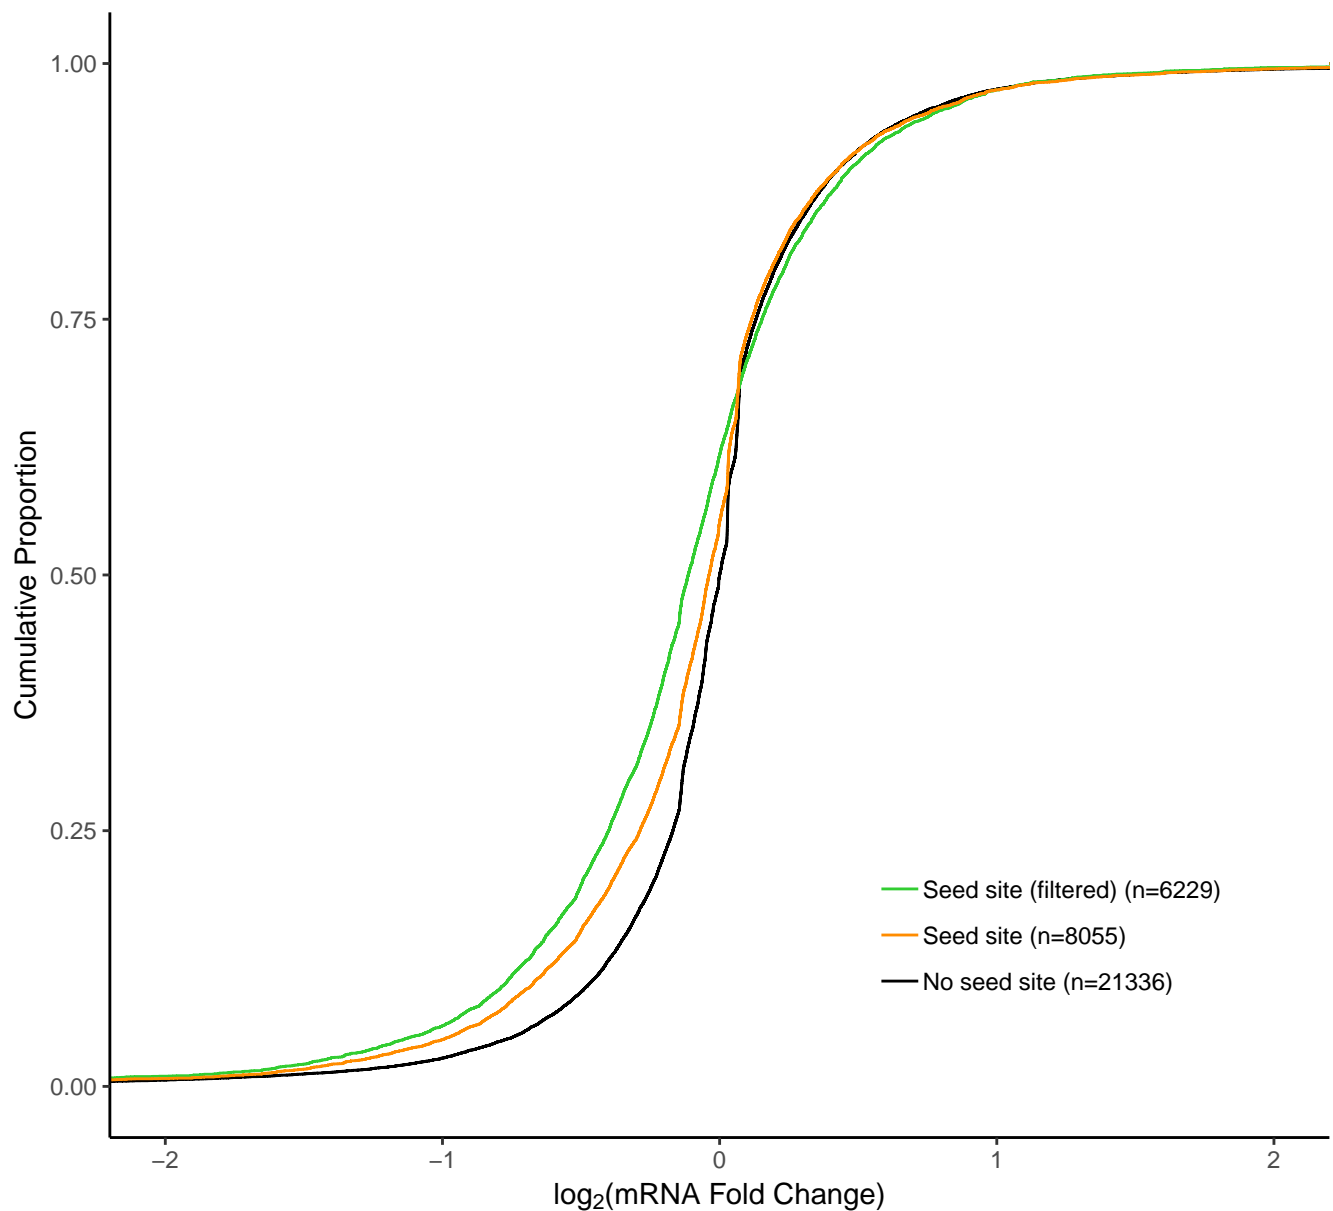



# miR-429-3p transfection (NMuMG)

$p \approx 9.57e-33$



# miR-24-3p transfection (CD4)

$p \approx 6.83e-05$

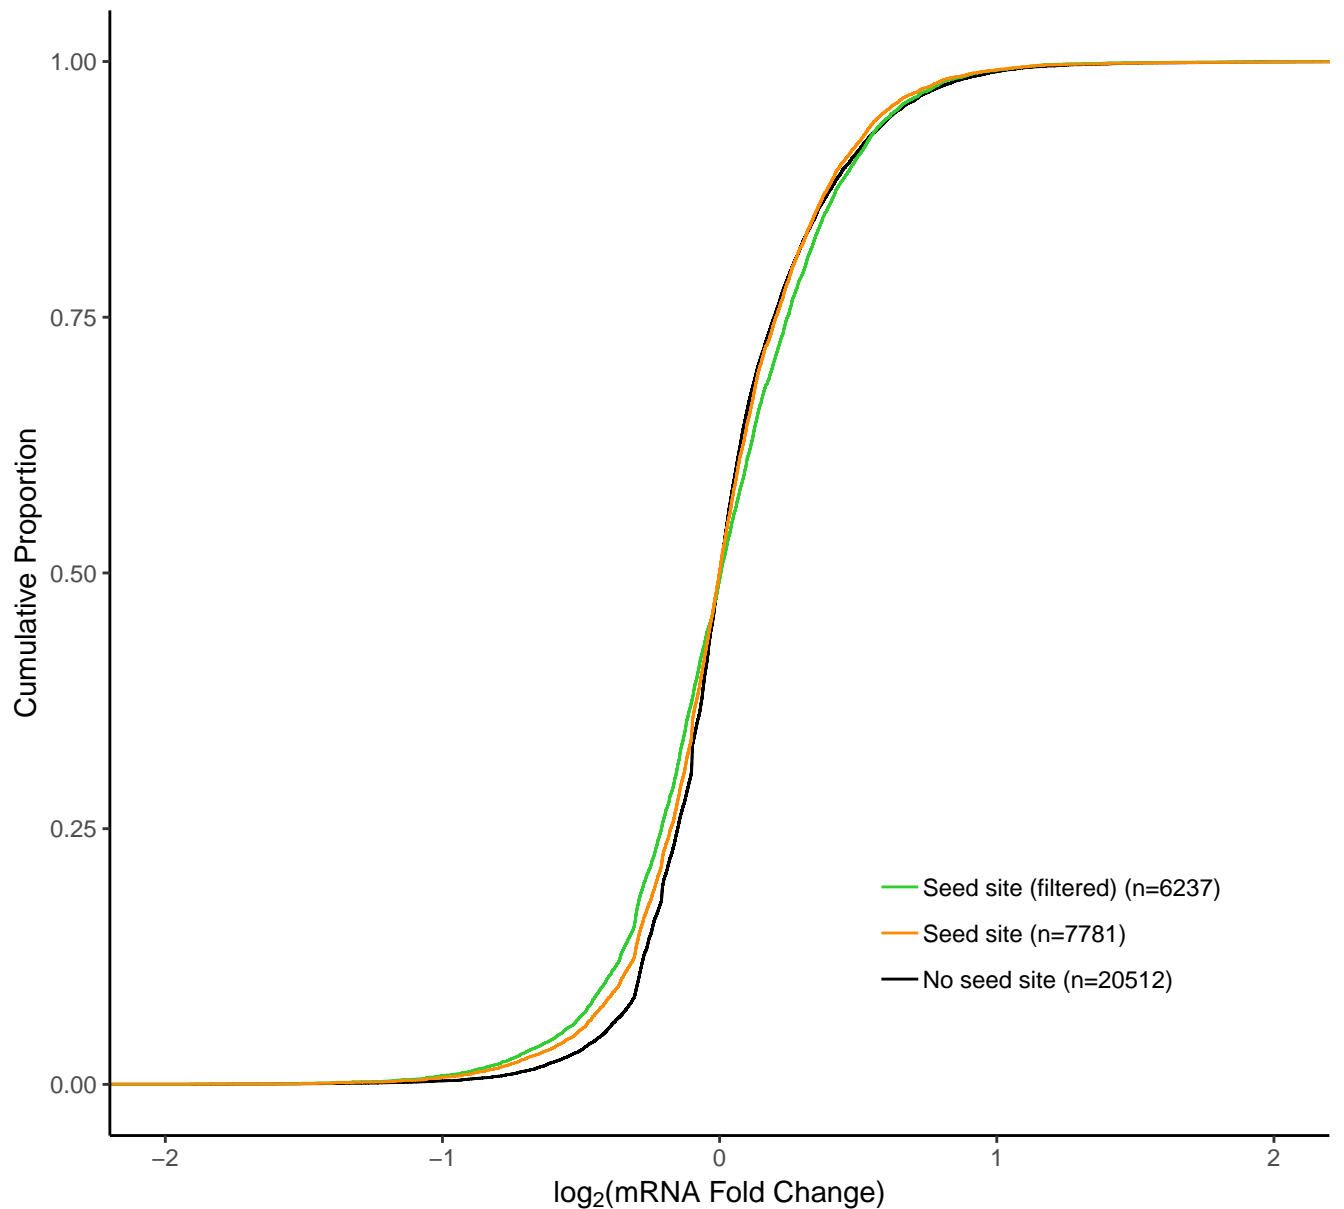

# miR-27a-3p transfection (CD4)

$p \approx 9.87e-08$

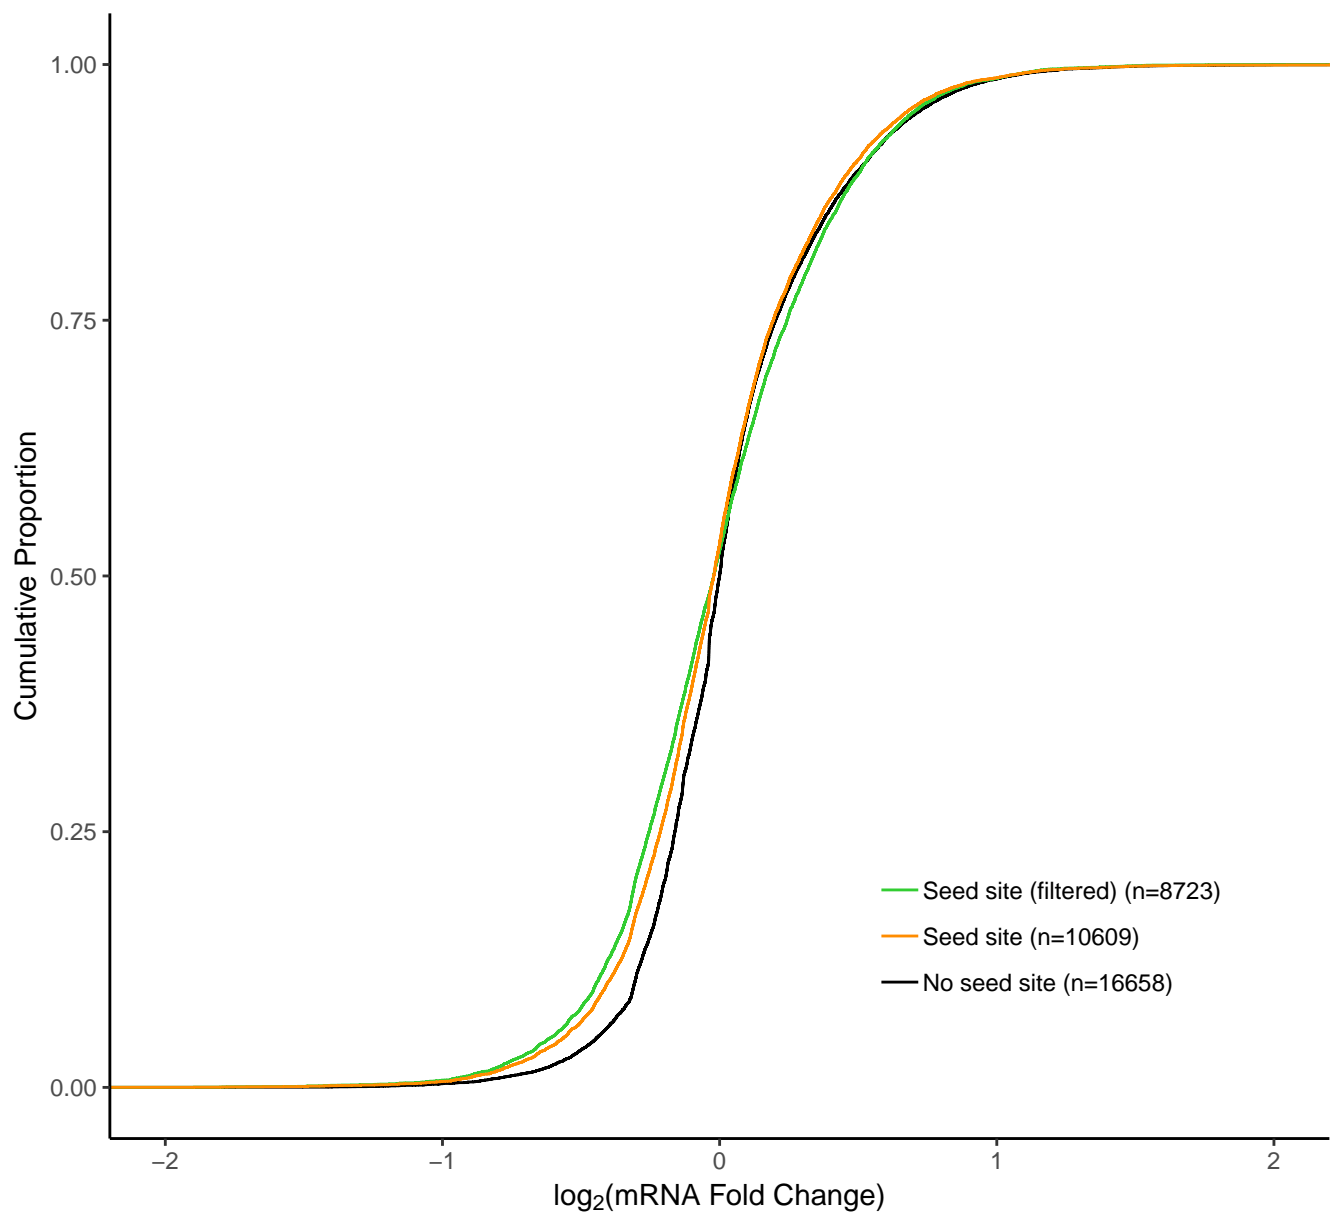

# miR-23a-3p transfection (CD4)

$p \approx 1.03e-05$

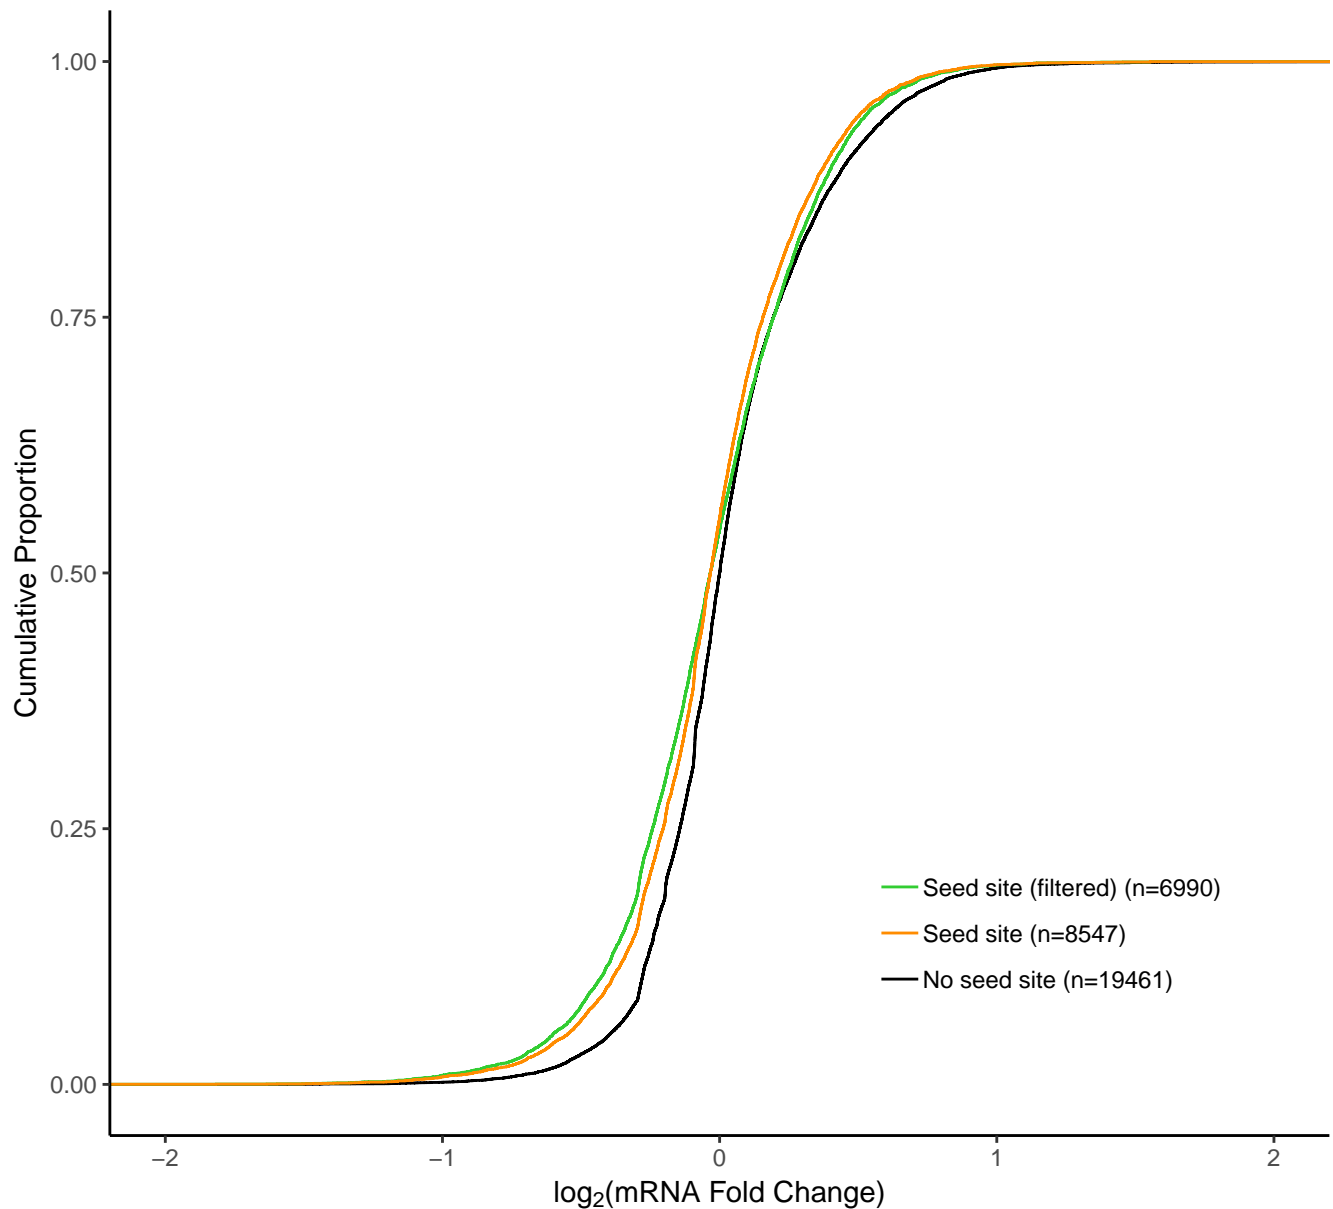

# let-7c-5p transfection (HeLa)

$p \approx 3.93e-11$

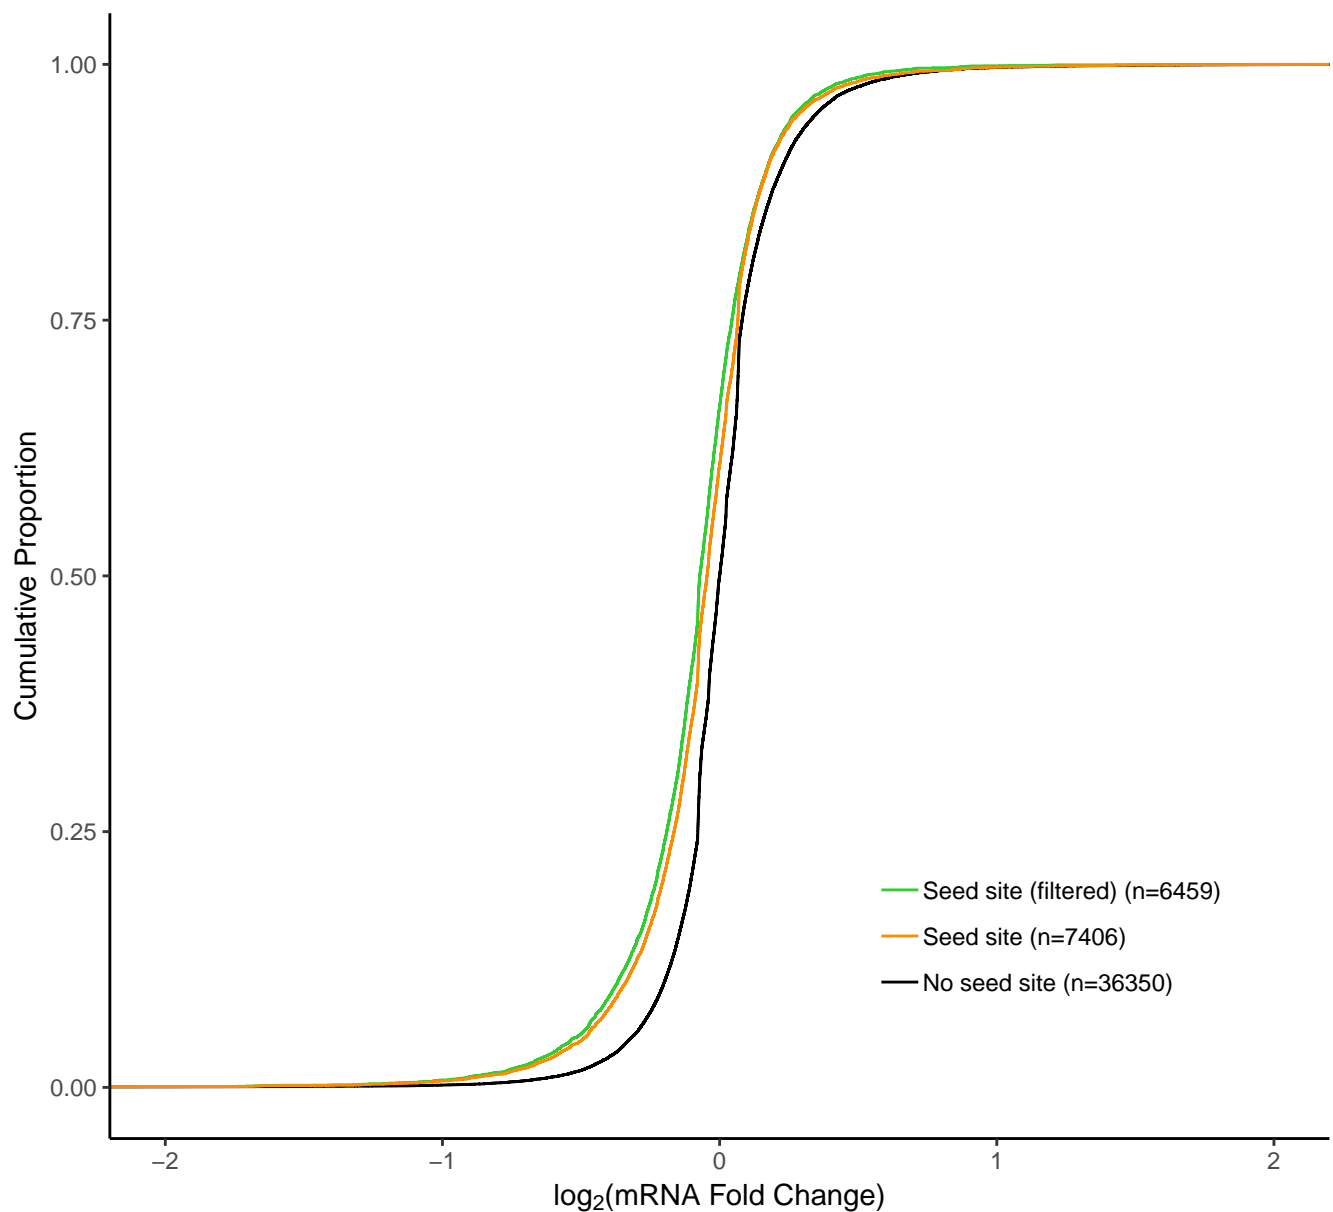

# miR-107 transfection (HeLa)

$p \approx 5.56e-16$

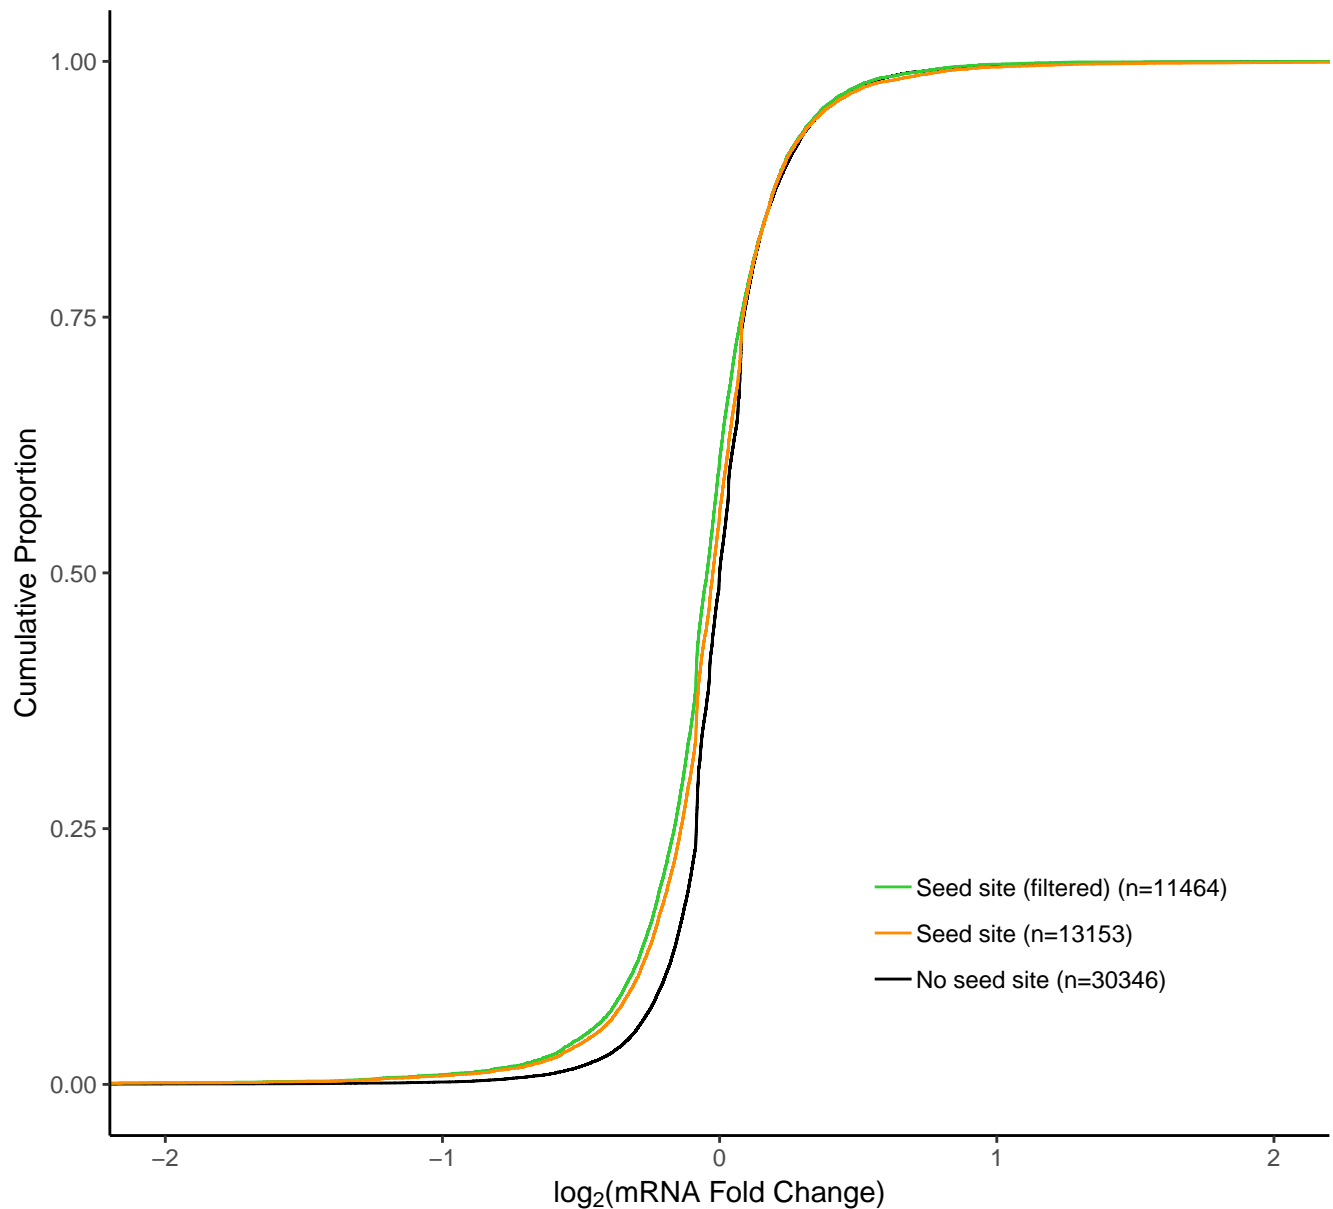

# miR-10a-5p transfection (HeLa)

$p \approx 4.08e-11$

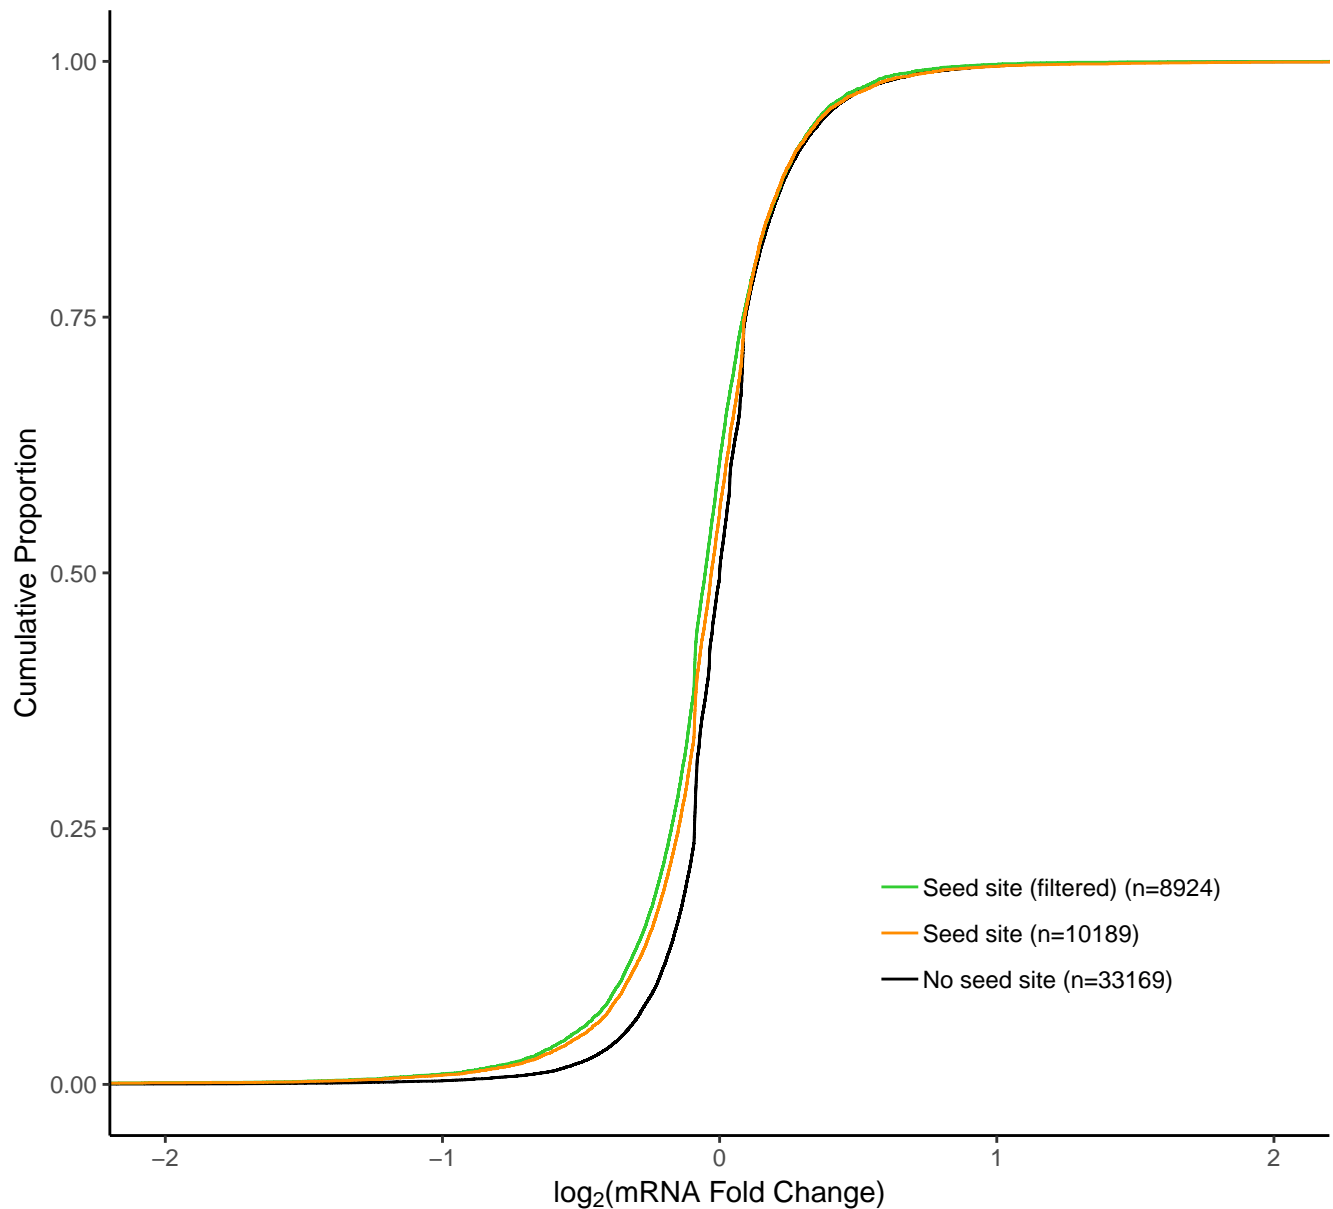

# miR-124-3p transfection (HeLa)

$p \approx 1.56e-17$

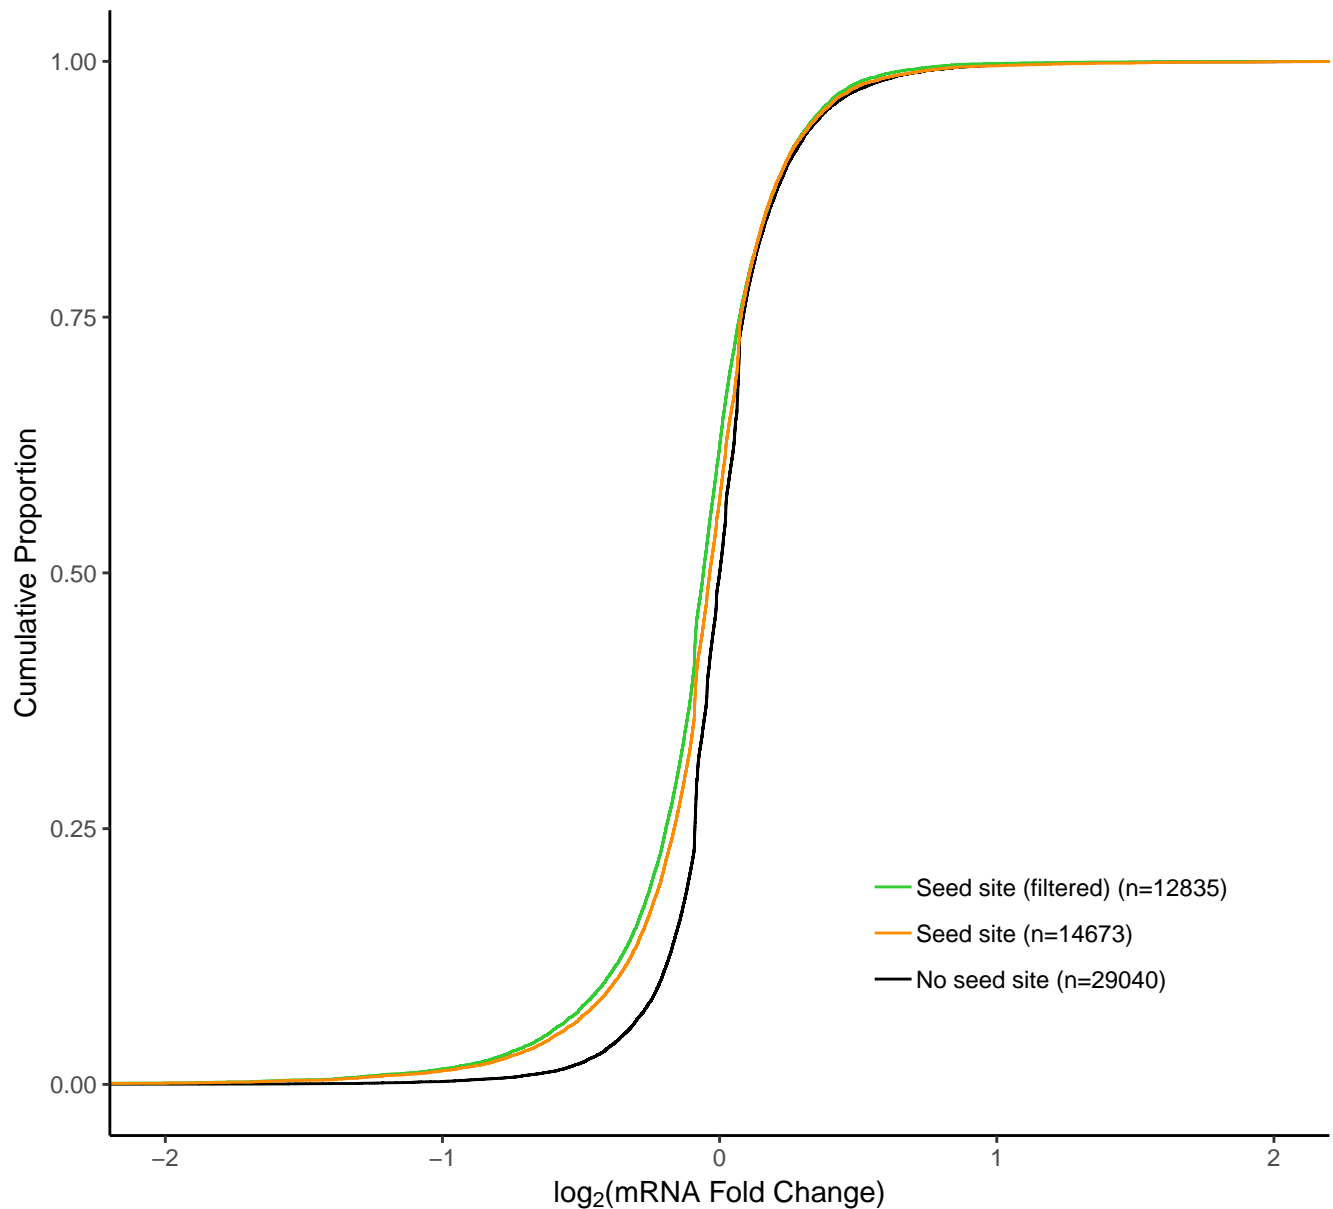



# miR-126-3p transfection (HeLa)

$p \approx 0.0234$

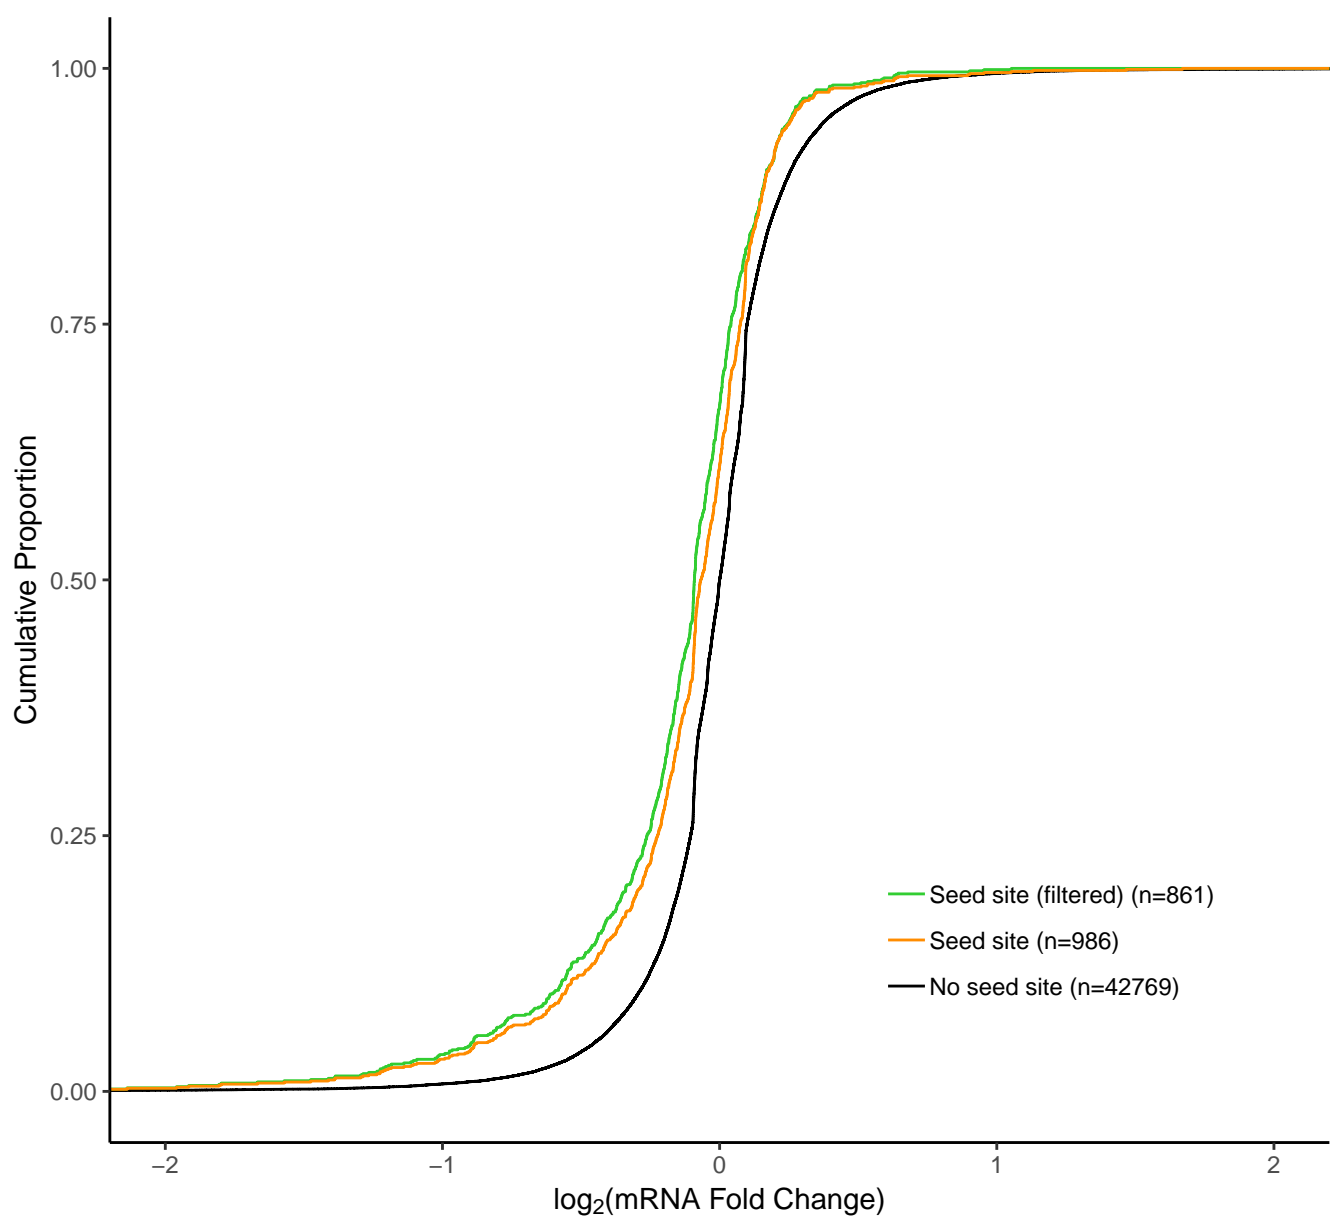

# miR-126-5p transfection (HeLa)

$p \approx 4.56e-17$

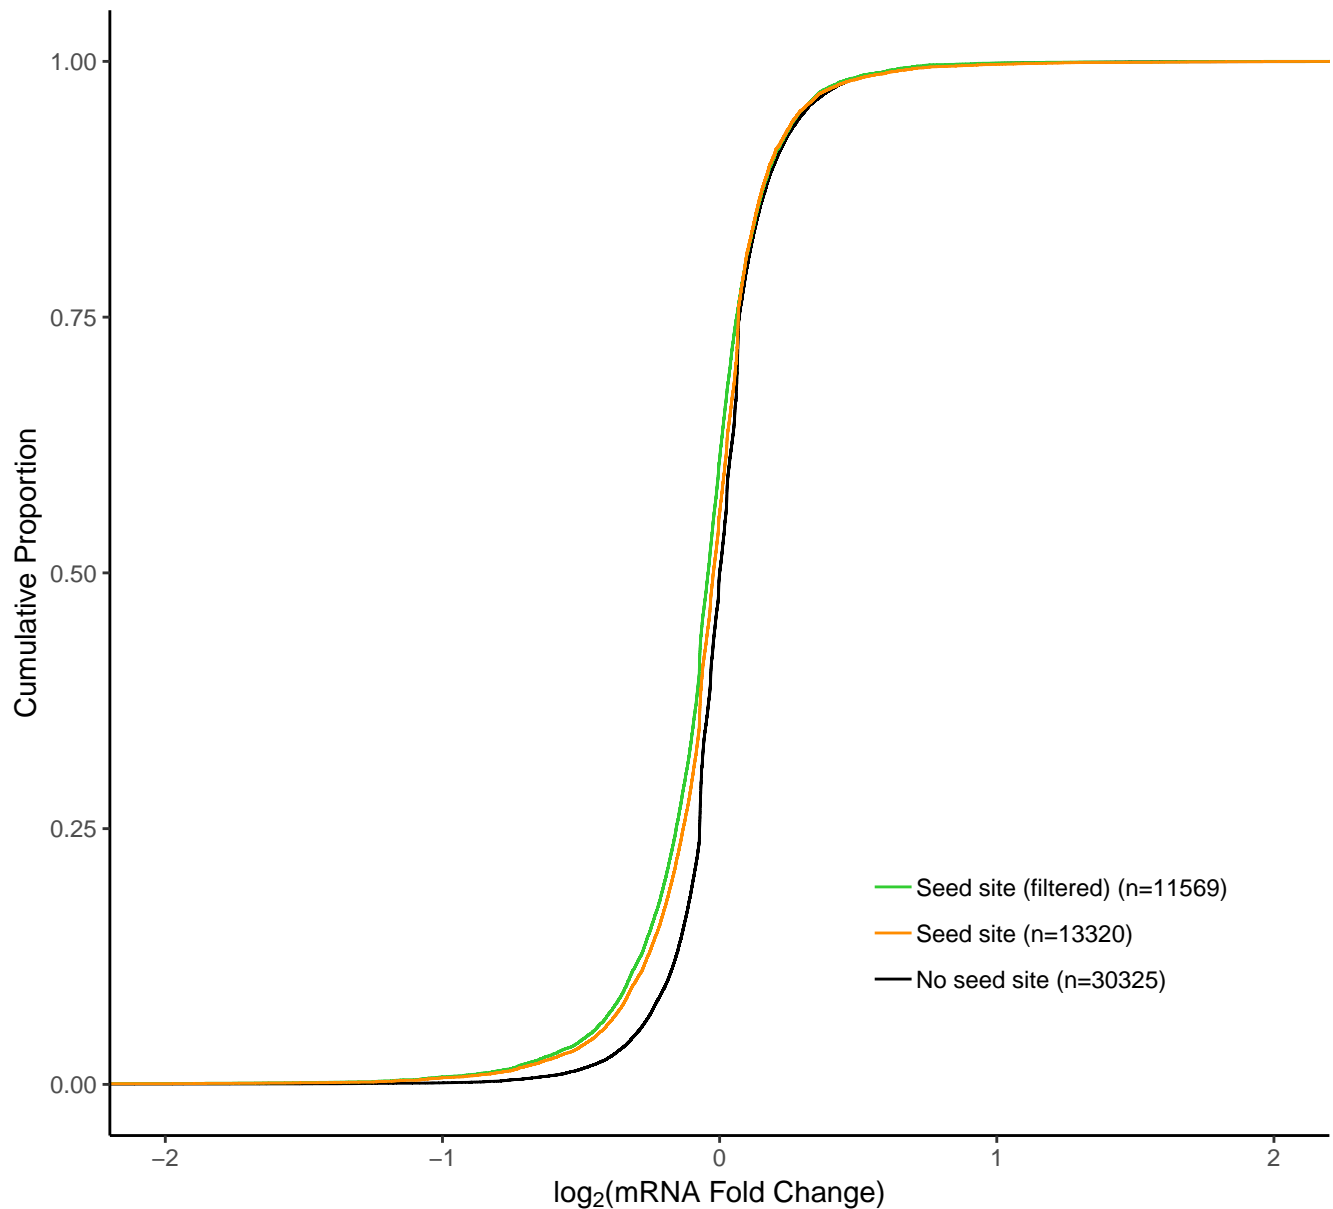

# miR-133b transfection (HeLa)

$p \approx 2.07e-09$

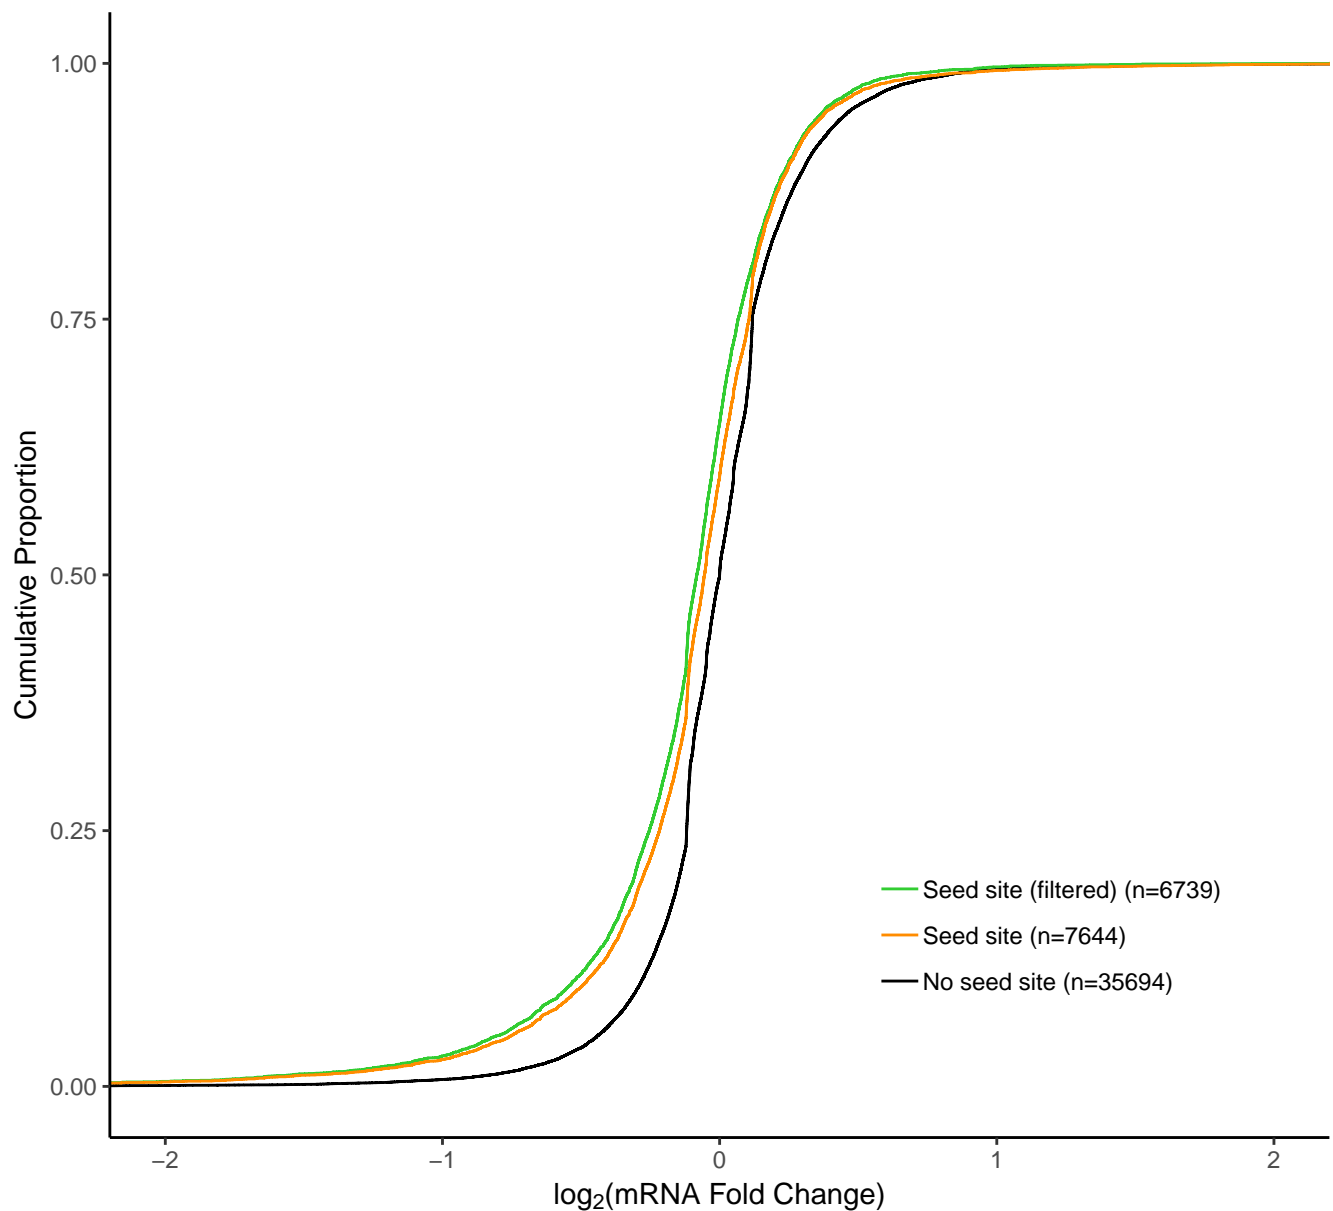

# miR-142-3p transfection (HeLa)

$p \approx 4.14e-07$

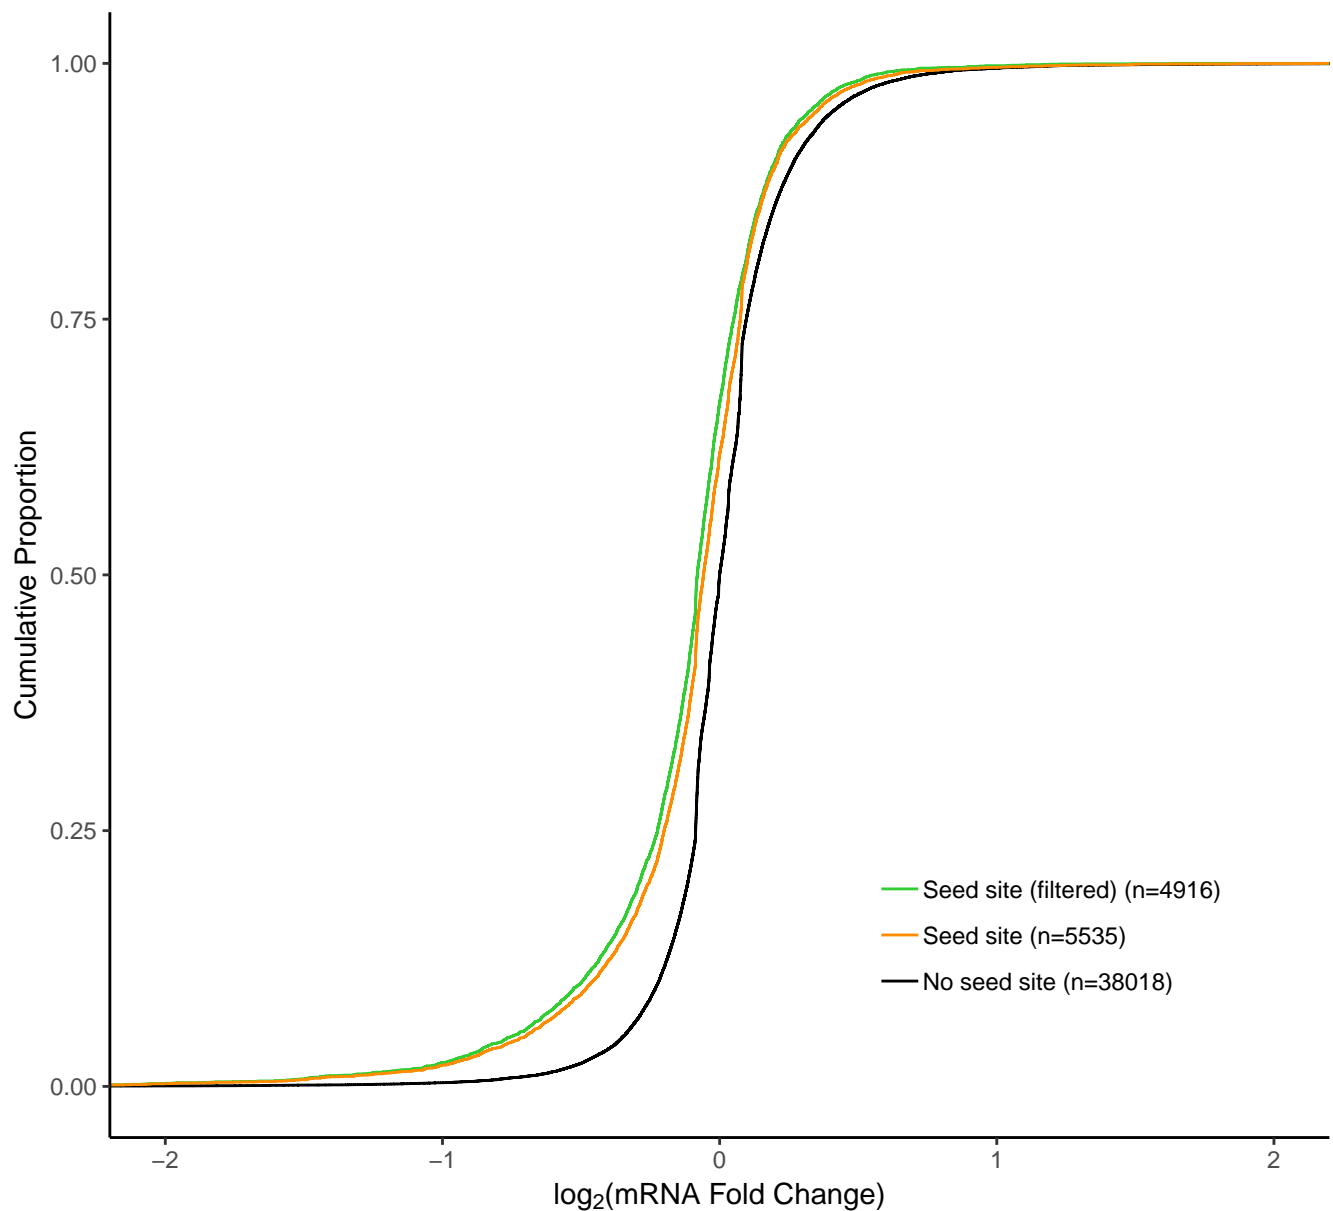

# miR-145-5p transfection (HeLa)

$p \approx 1.26e-13$

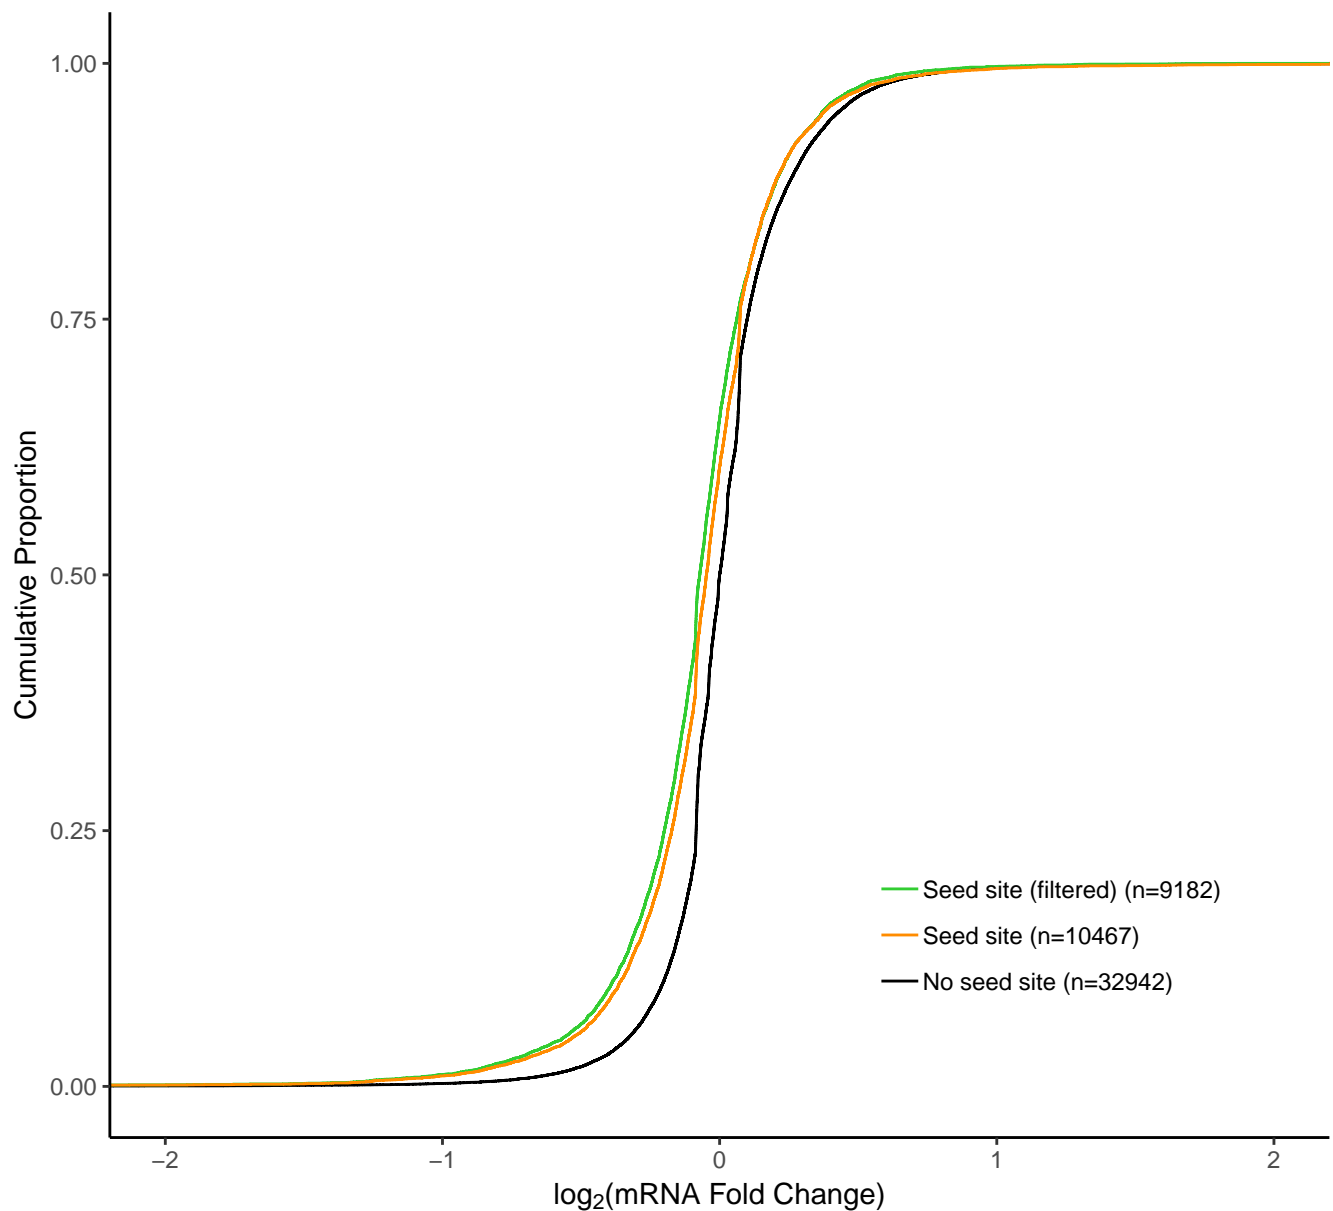

# miR-146a-5p transfection (HeLa)

$p \approx 4.25e-12$

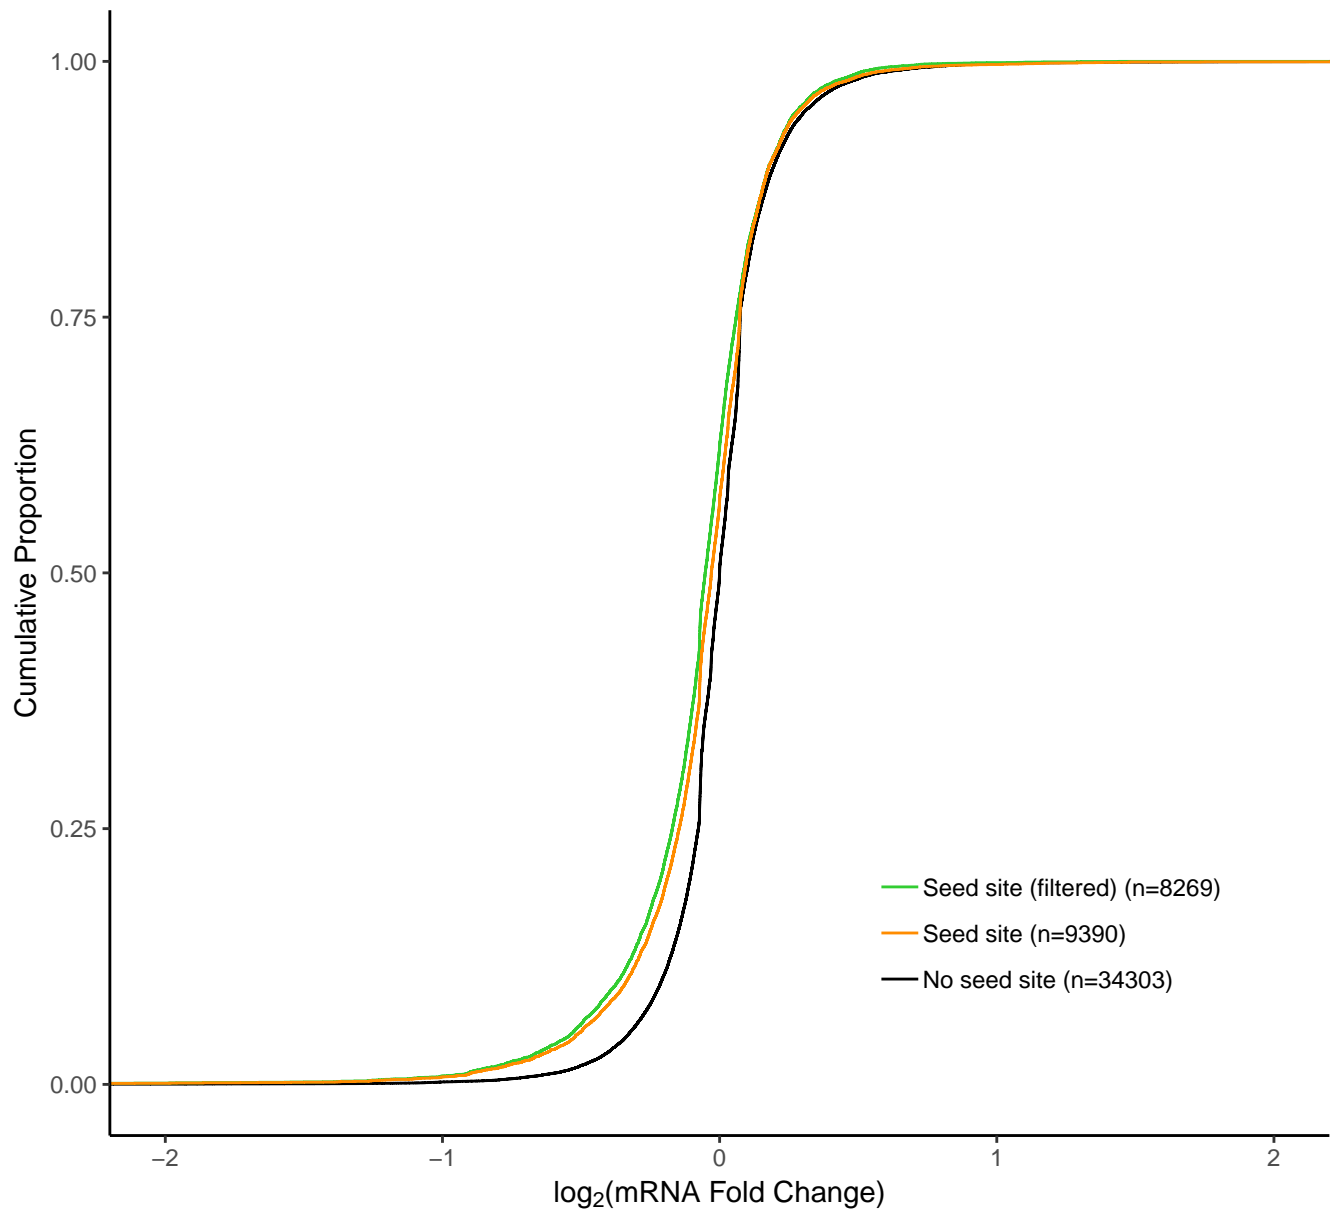

# miR-155-5p transfection (HeLa)

$p \approx 2.67e-11$

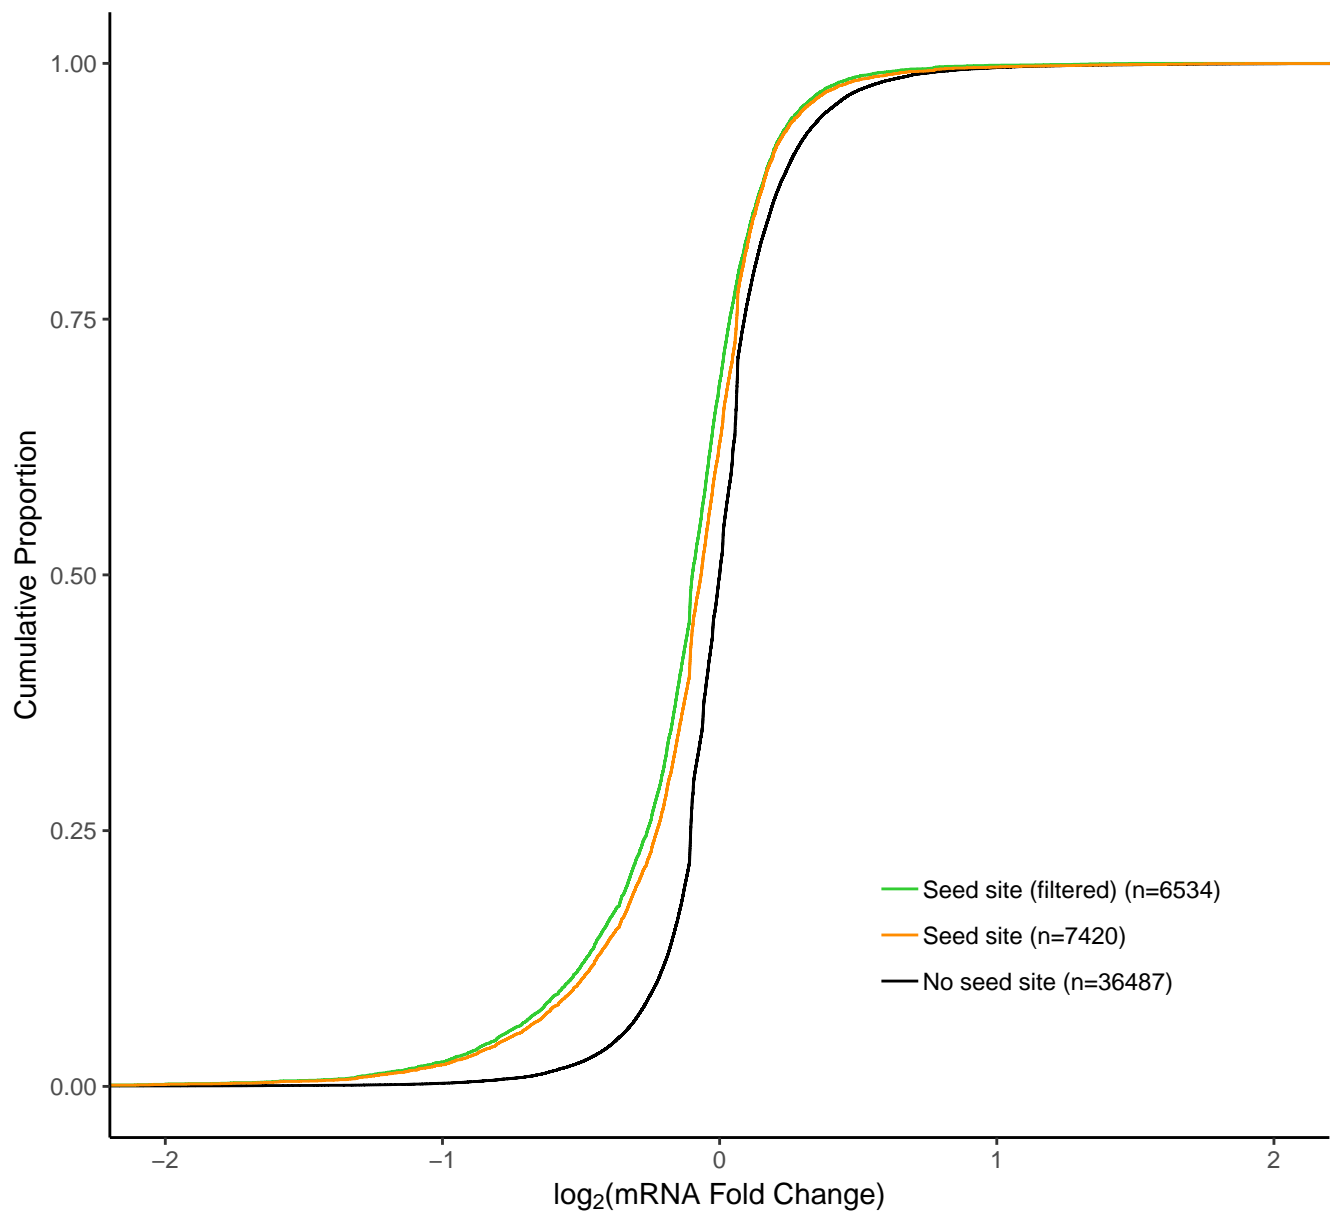

# miR-15a-5p transfection (HeLa)

$p \approx 1.18e-22$

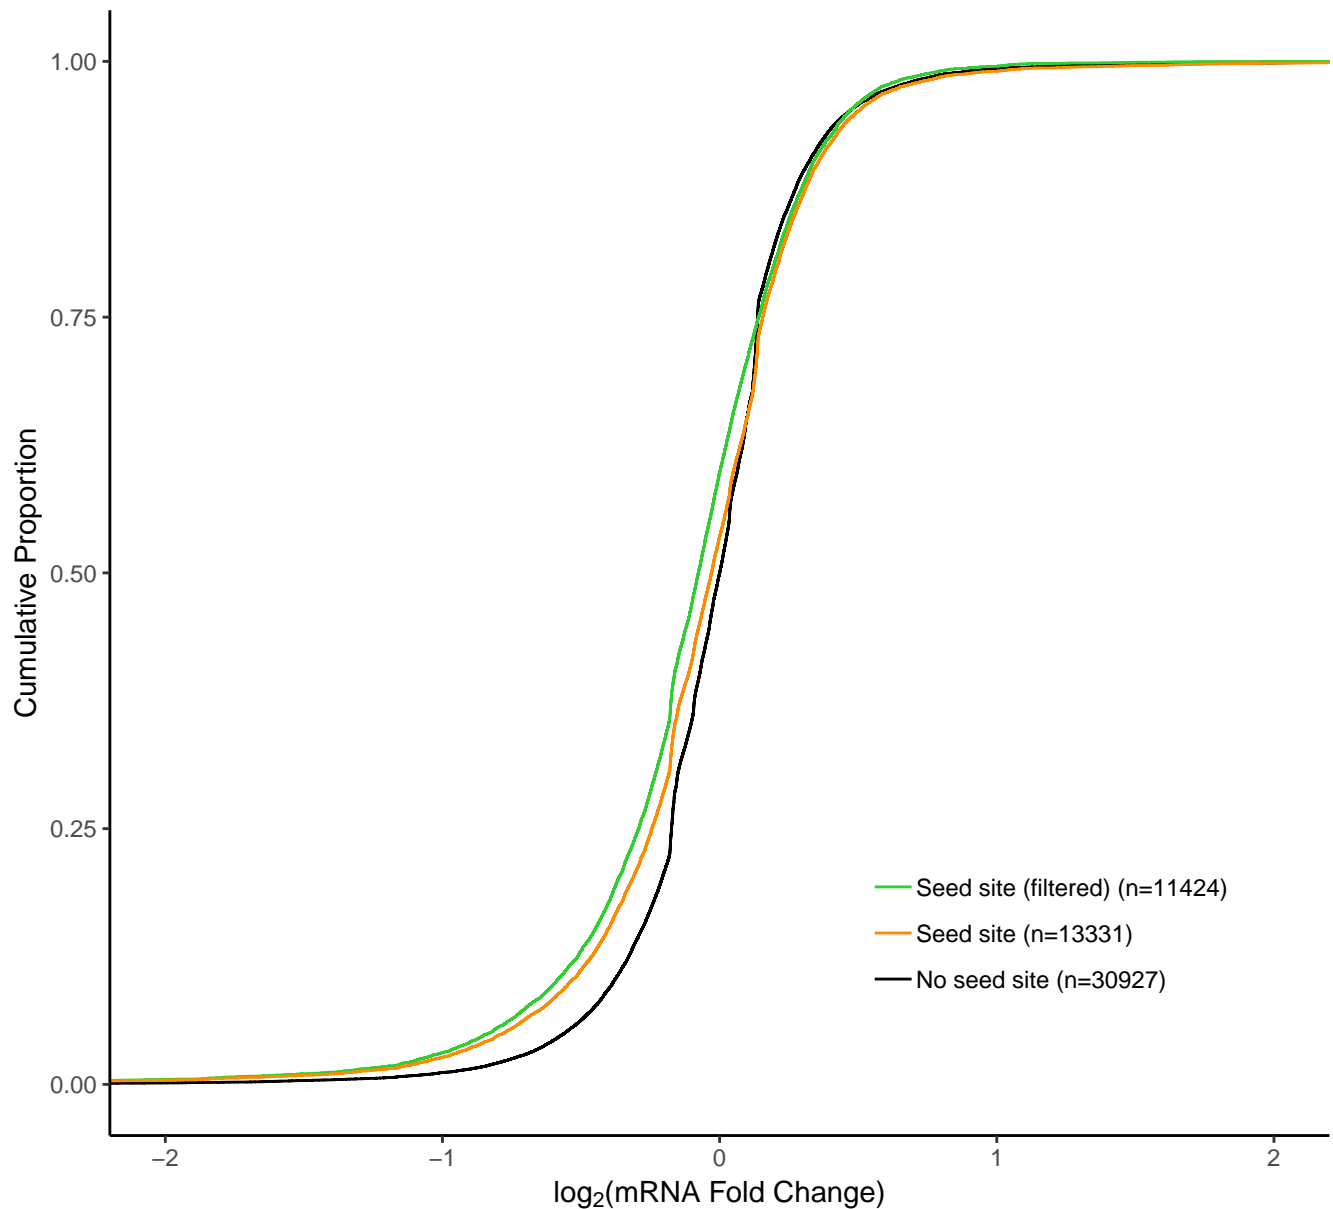



# miR-17-5p transfection (HeLa)

$p \approx 2.12e-18$

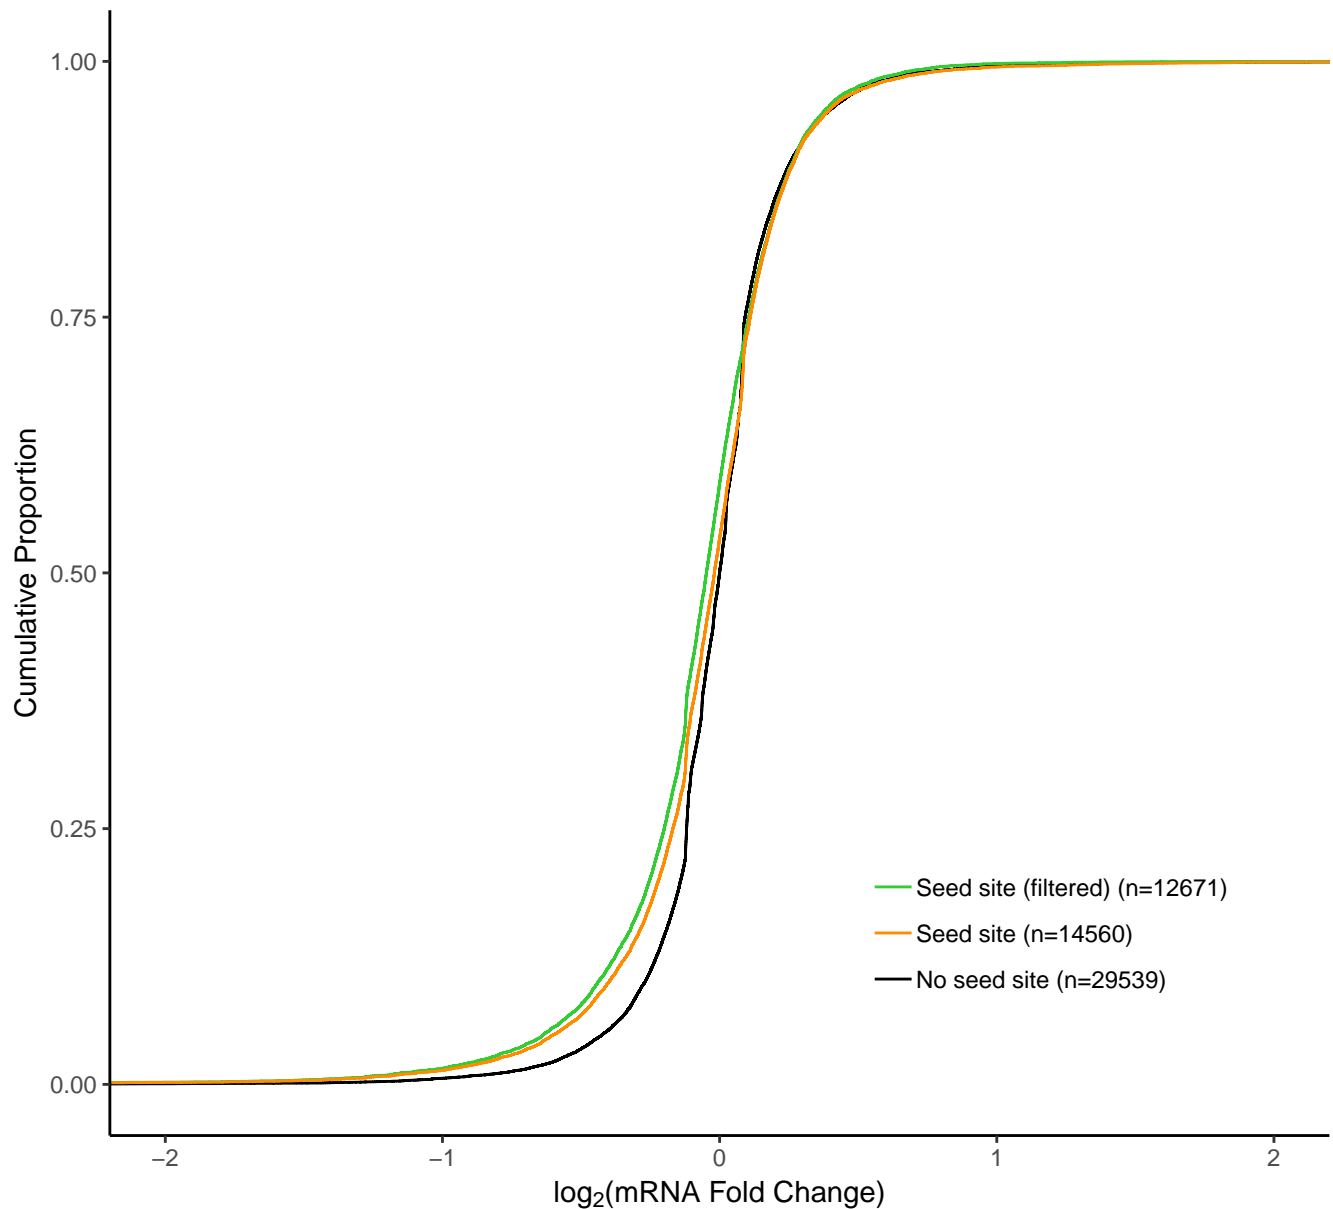

# miR-193b-3p transfection (HeLa)

$p \approx 9.1e-18$

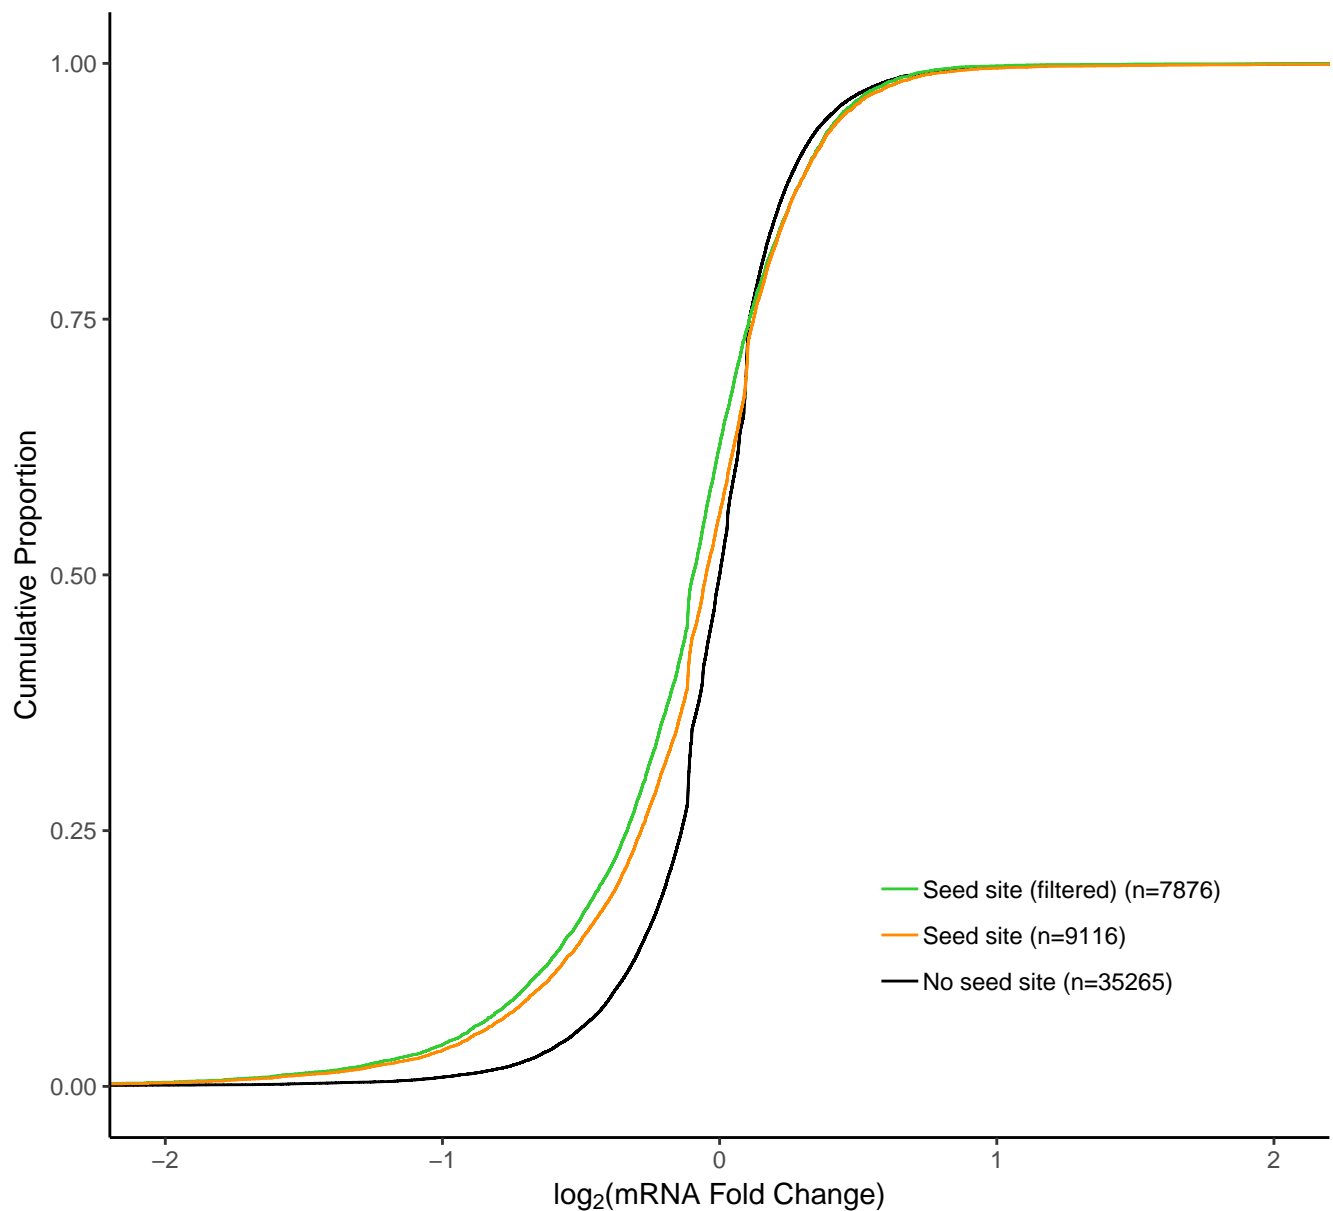

# miR-200a-3p transfection (HeLa)

$p \approx 5.77e-15$

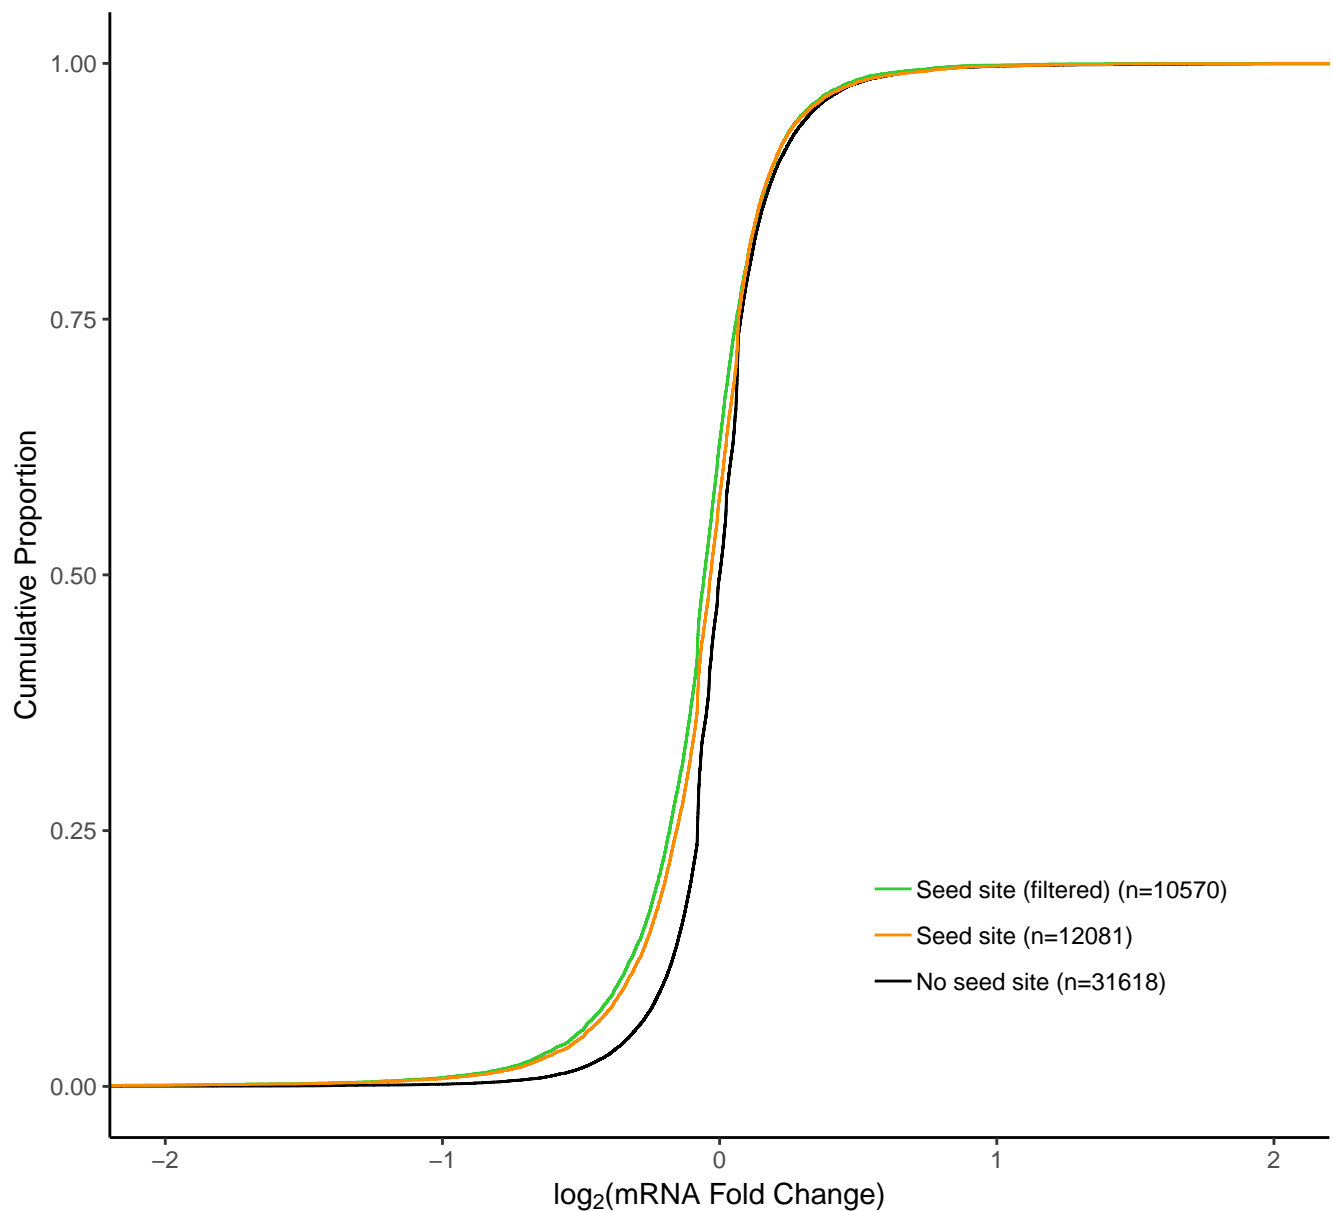

# miR-200b-3p transfection (HeLa)

$p \approx 5.03e-13$

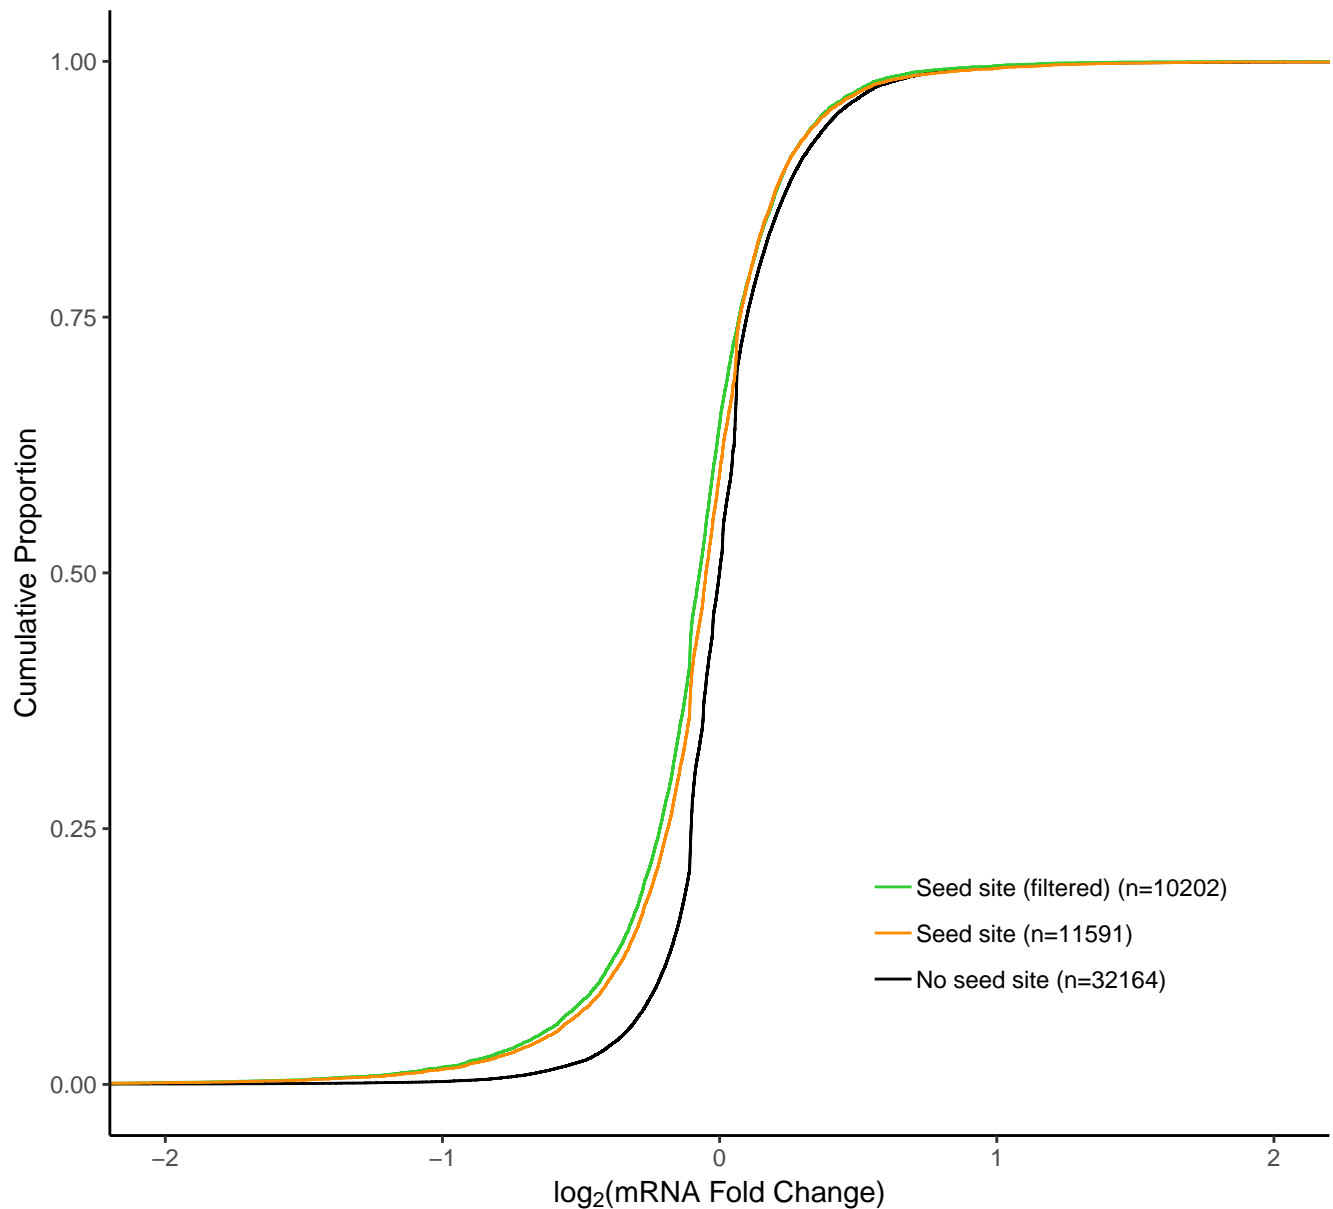

# miR-200c-3p transfection (HeLa)

$p \approx 8.4e-14$

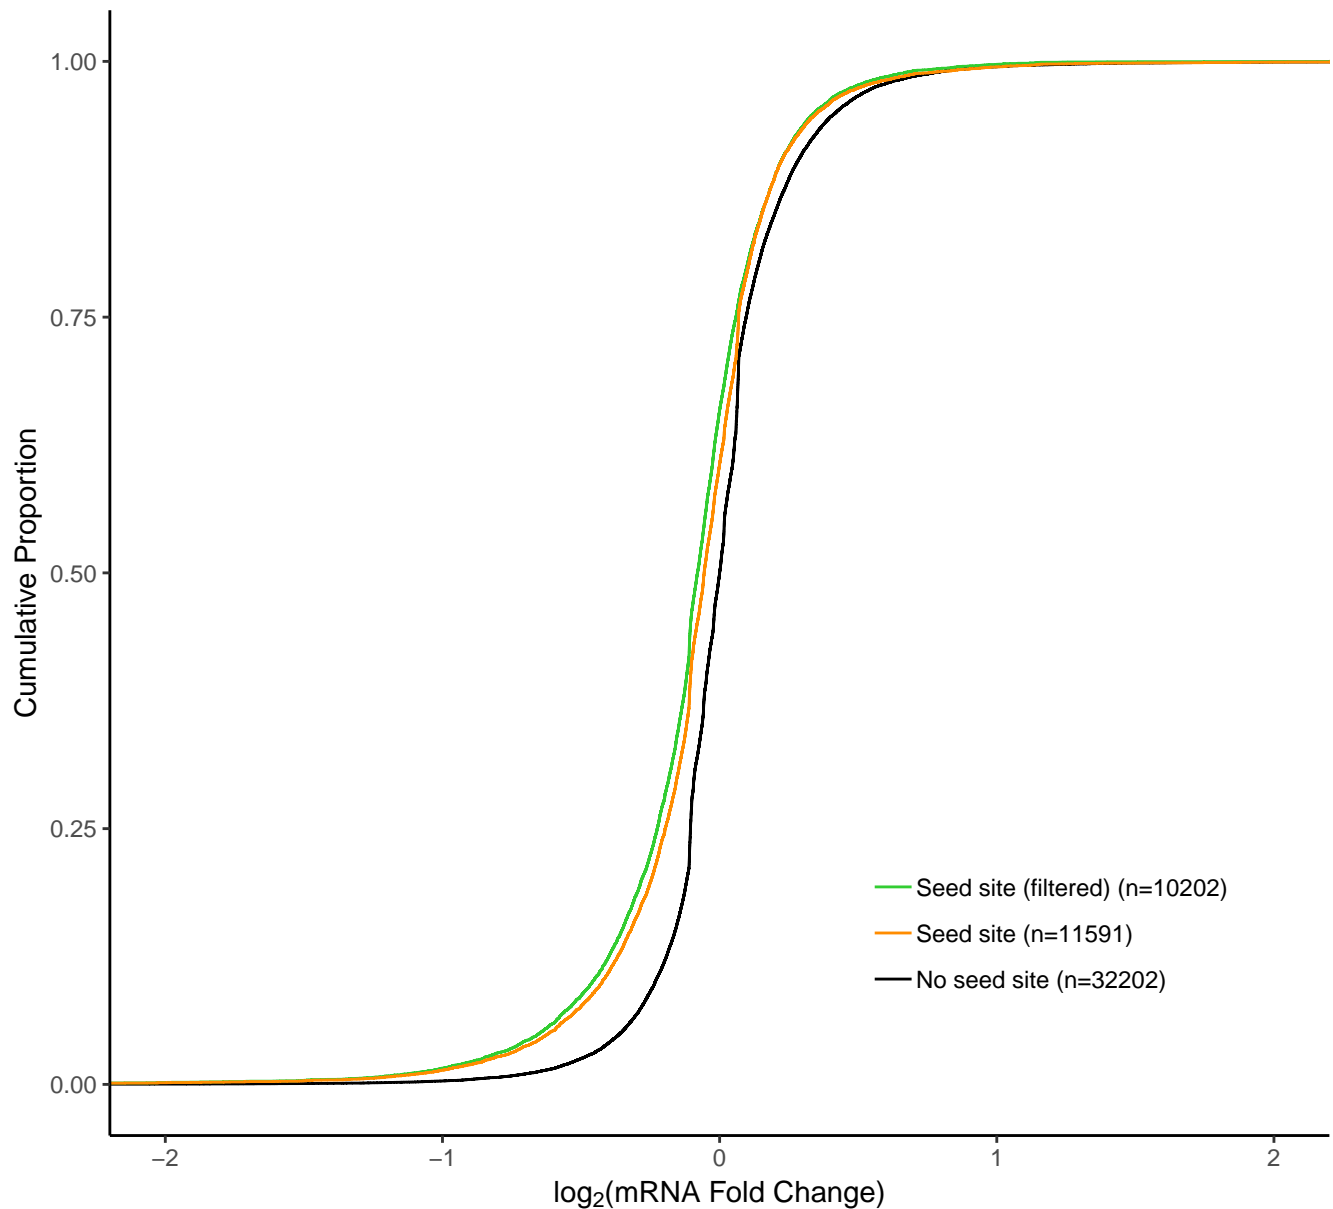

# miR-206 transfection (HeLa)

$p \approx 9.79e-14$

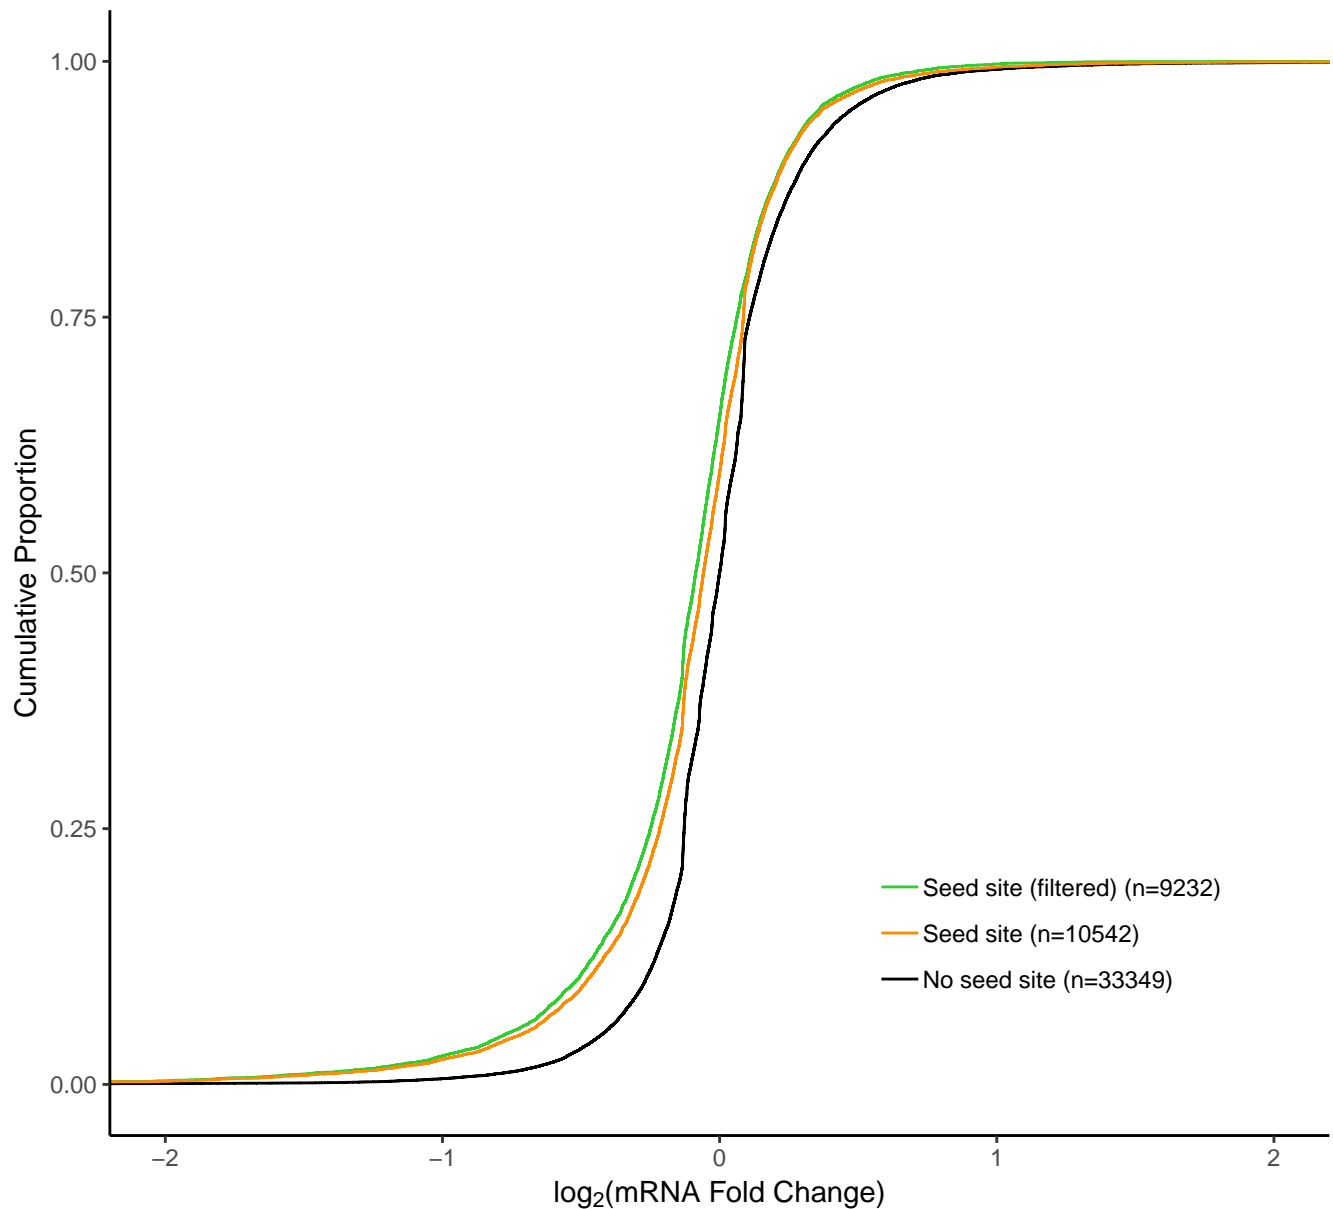

# miR-210-3p transfection (HeLa)

$p \approx 9.52e-06$

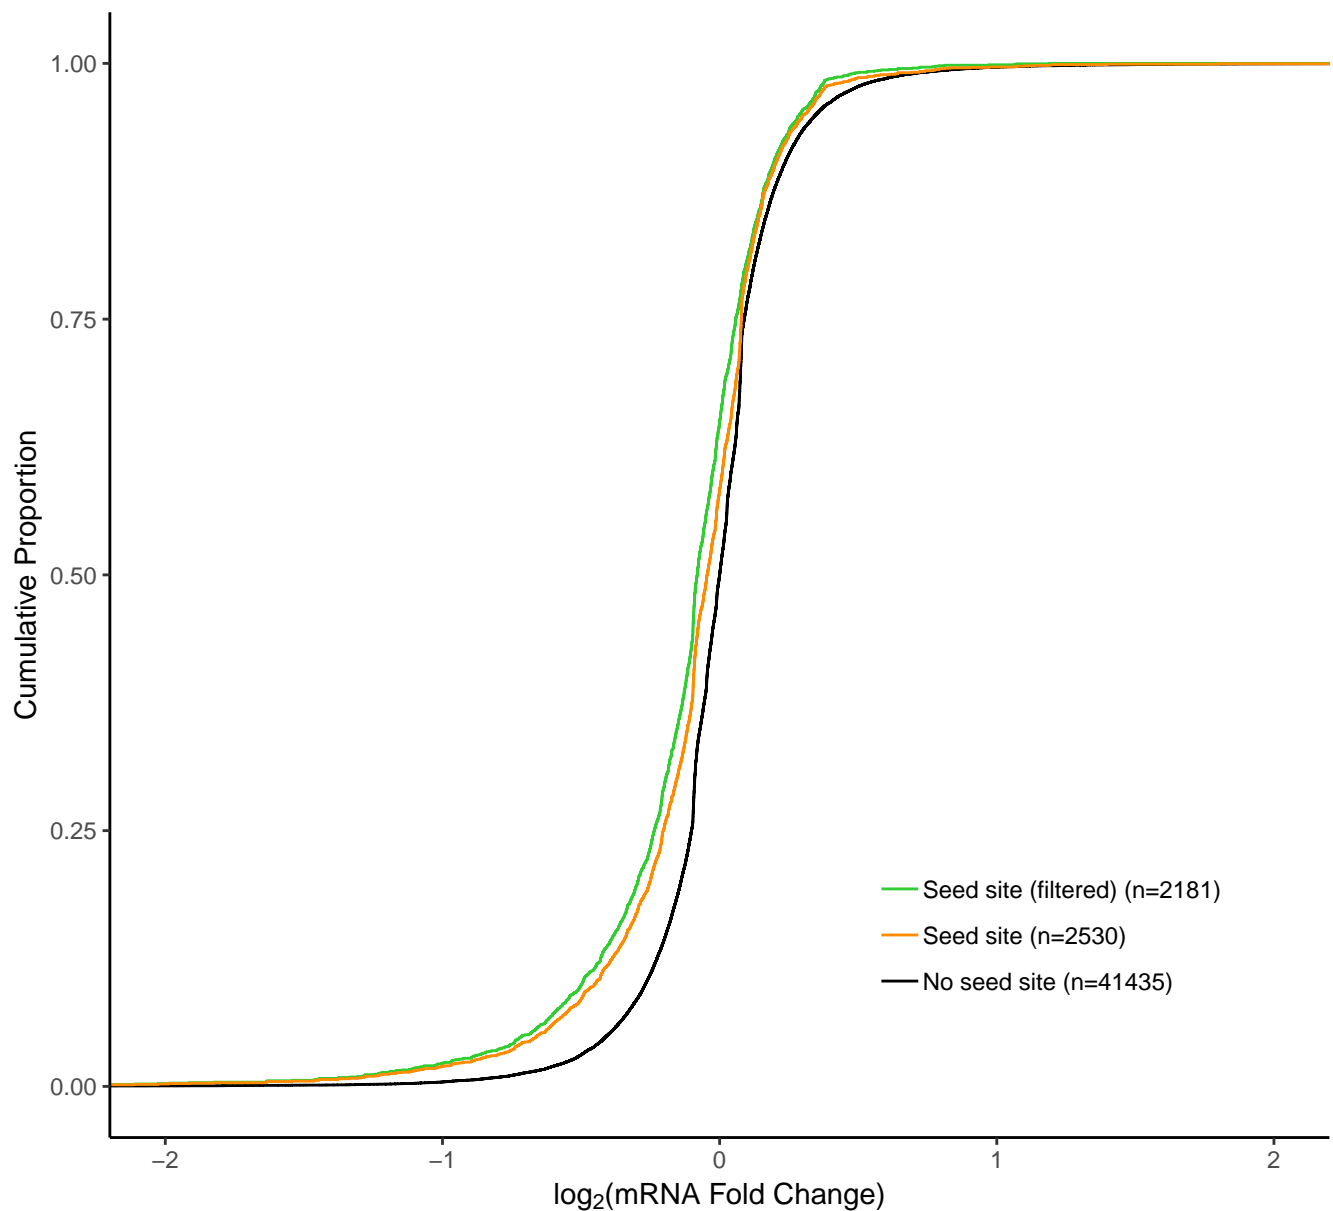

# miR-21-5p transfection (HeLa)

$p \approx 2.57e-09$

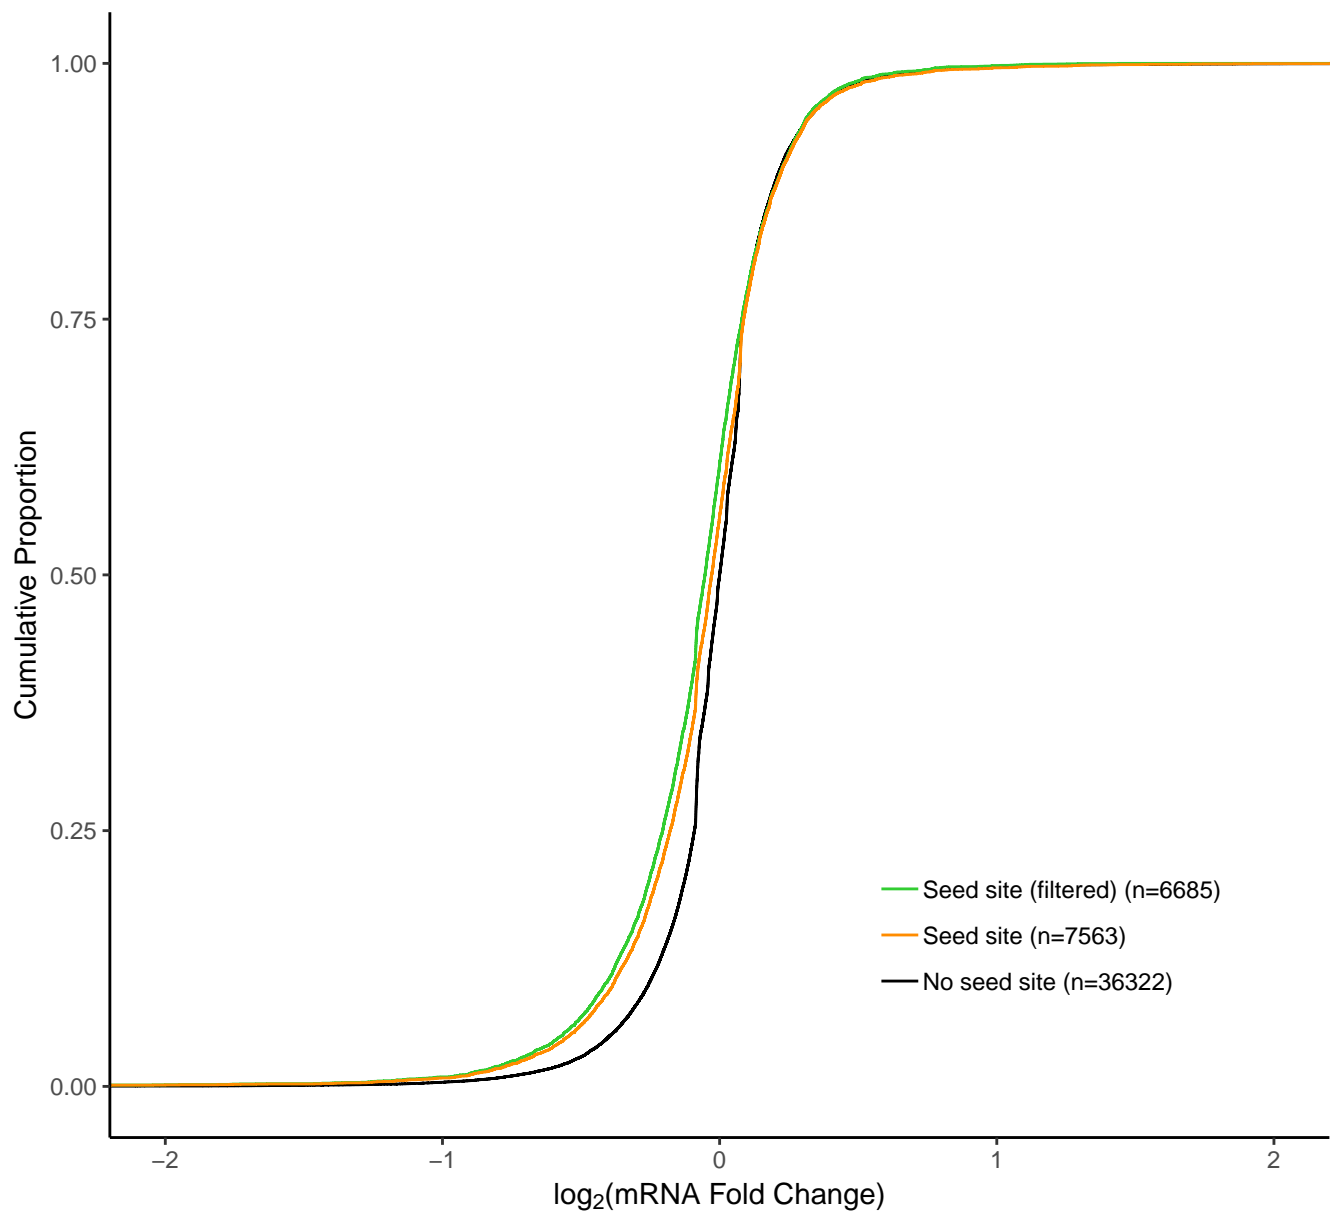



# miR-31-5p transfection (HeLa)

$p \approx 5.79e-14$

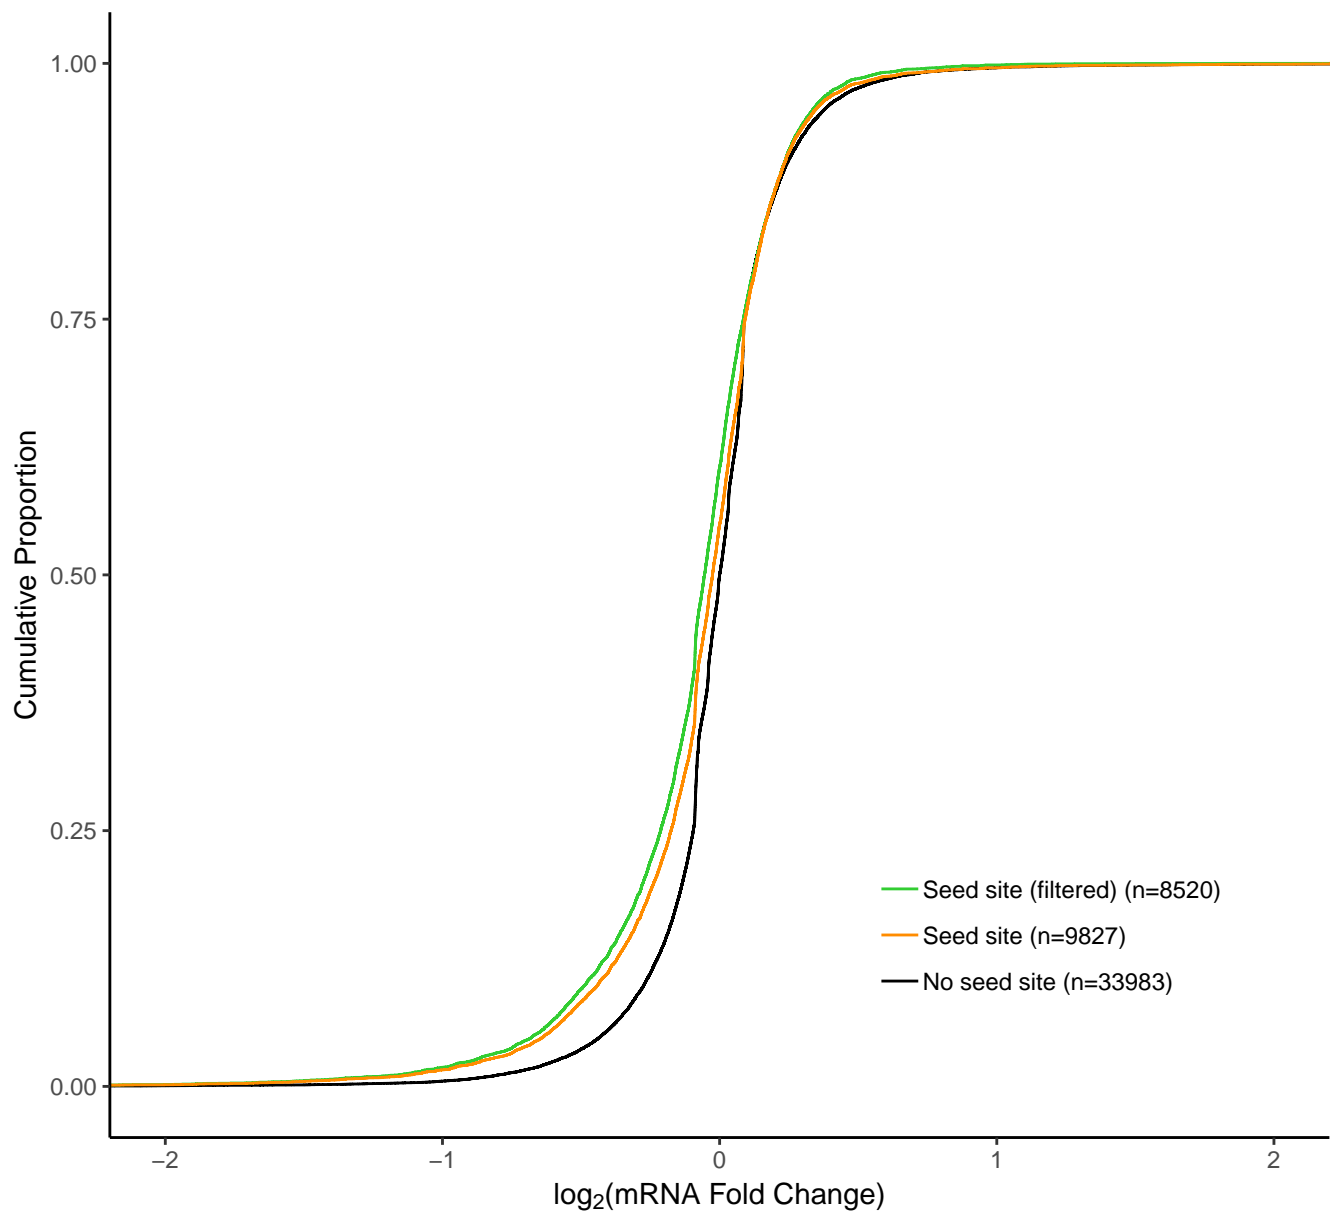

# miR-34a-5p transfection (HeLa)

$p \approx 4.59e-16$

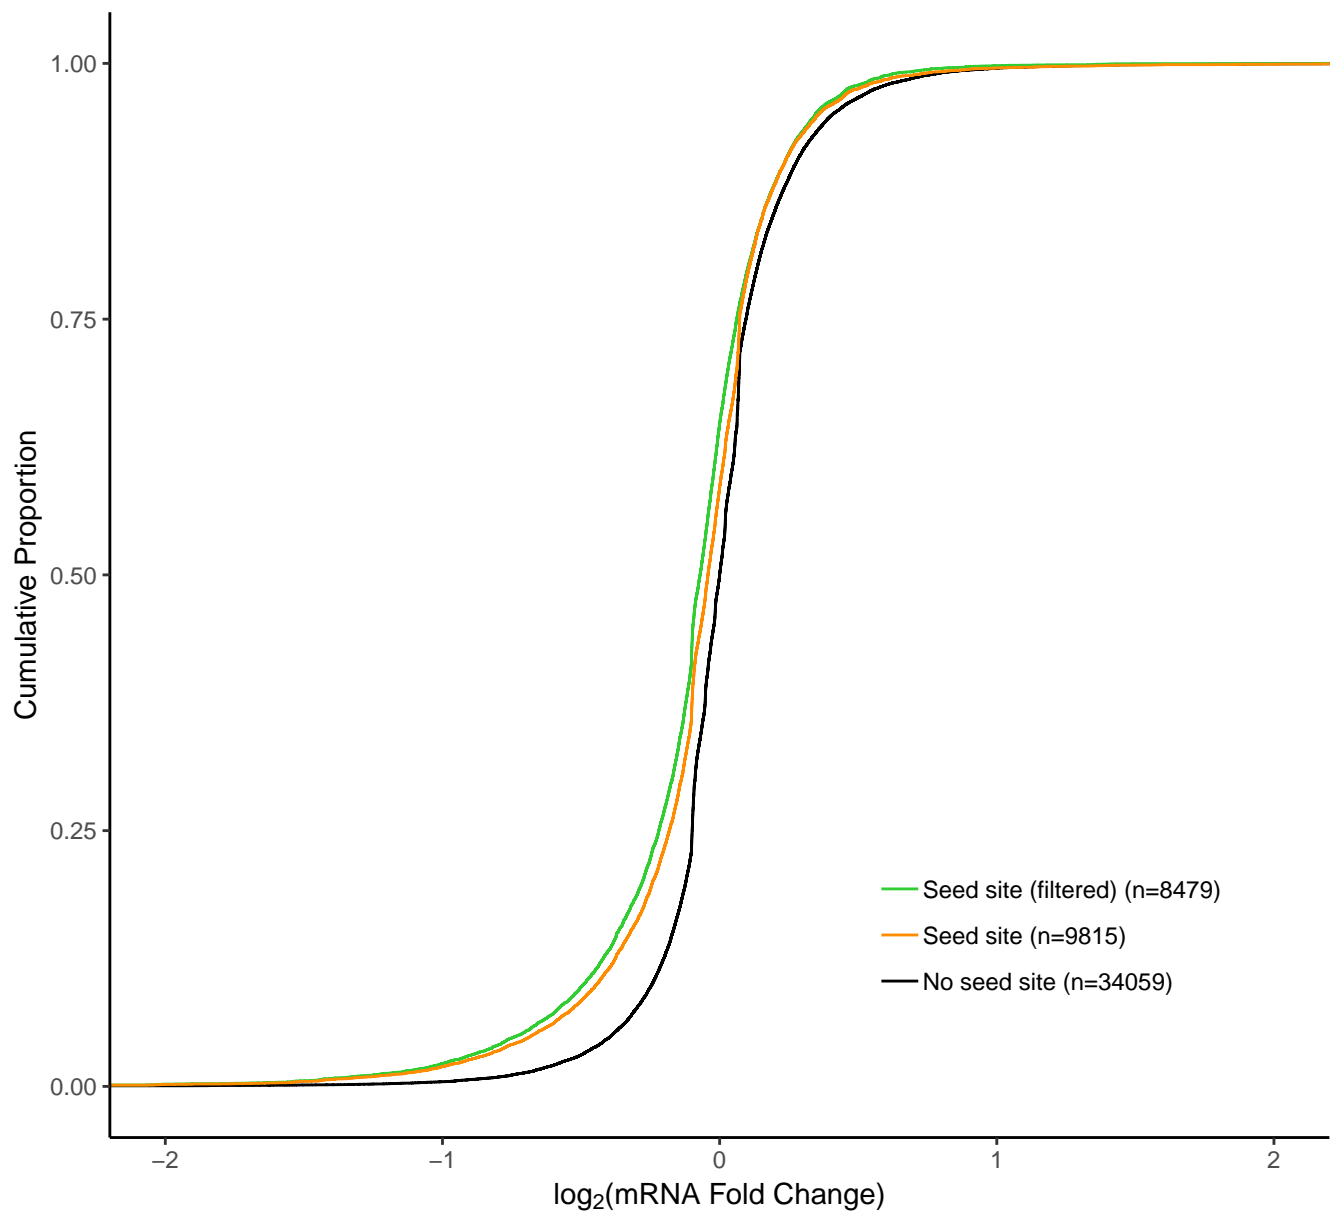

# miR-9-3p transfection (HeLa)

$\rho \approx 3.32e-12$

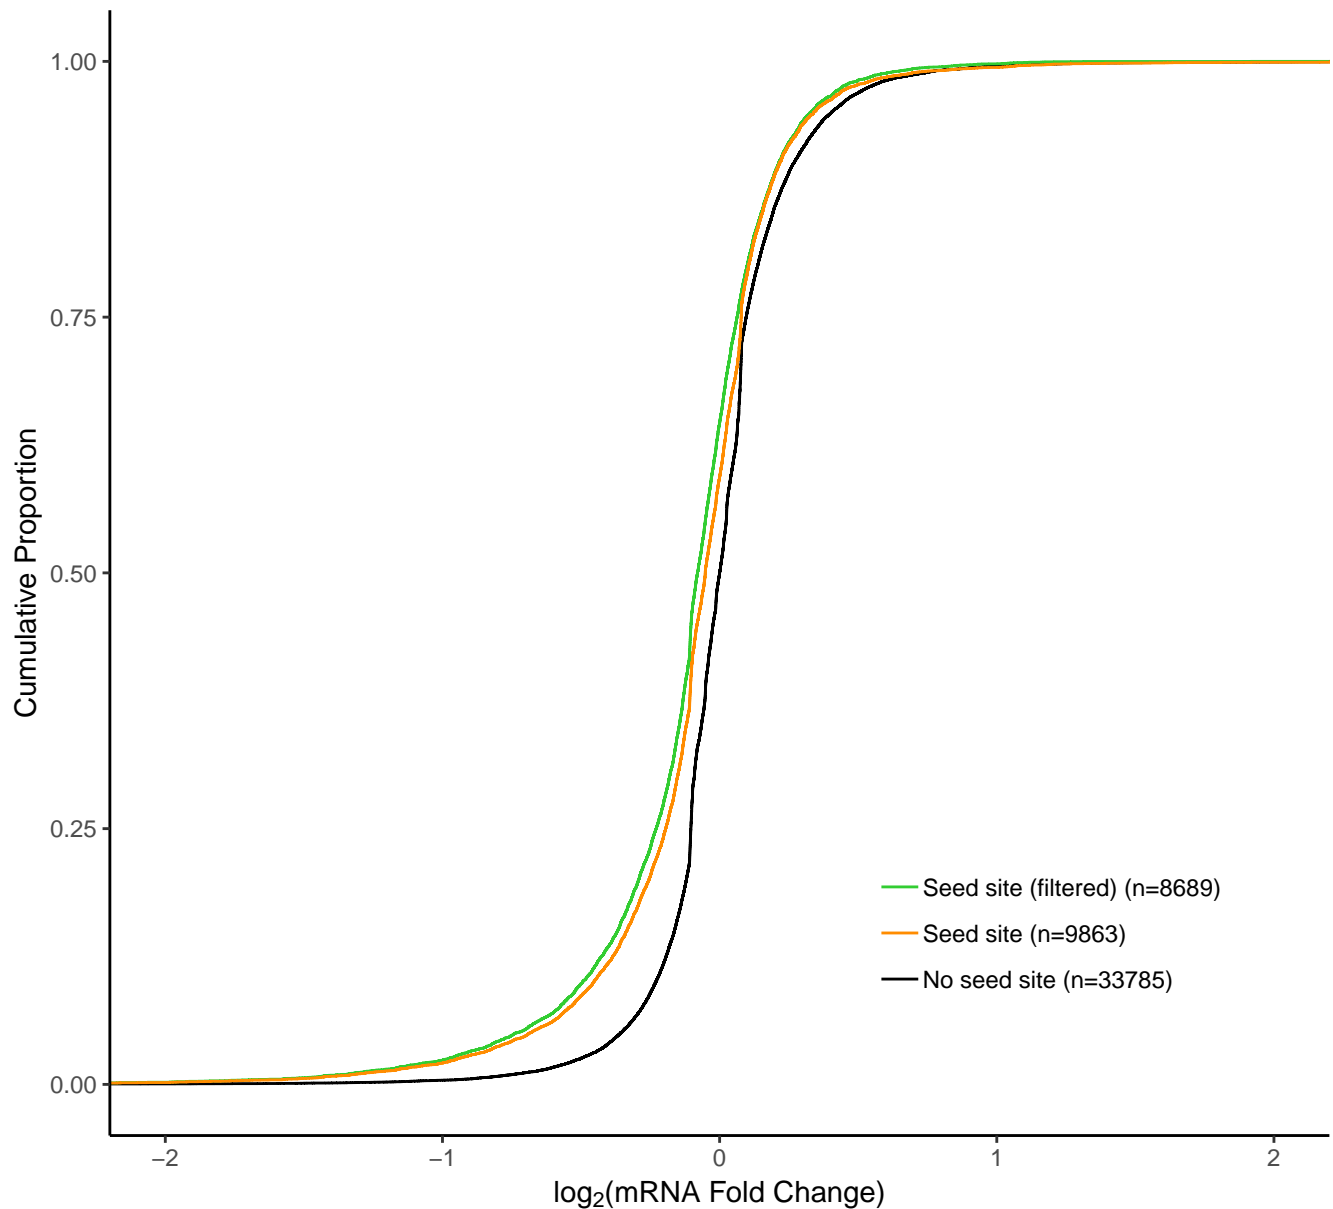

# miR-9-5p transfection (HeLa)

$p \approx 2.41e-16$

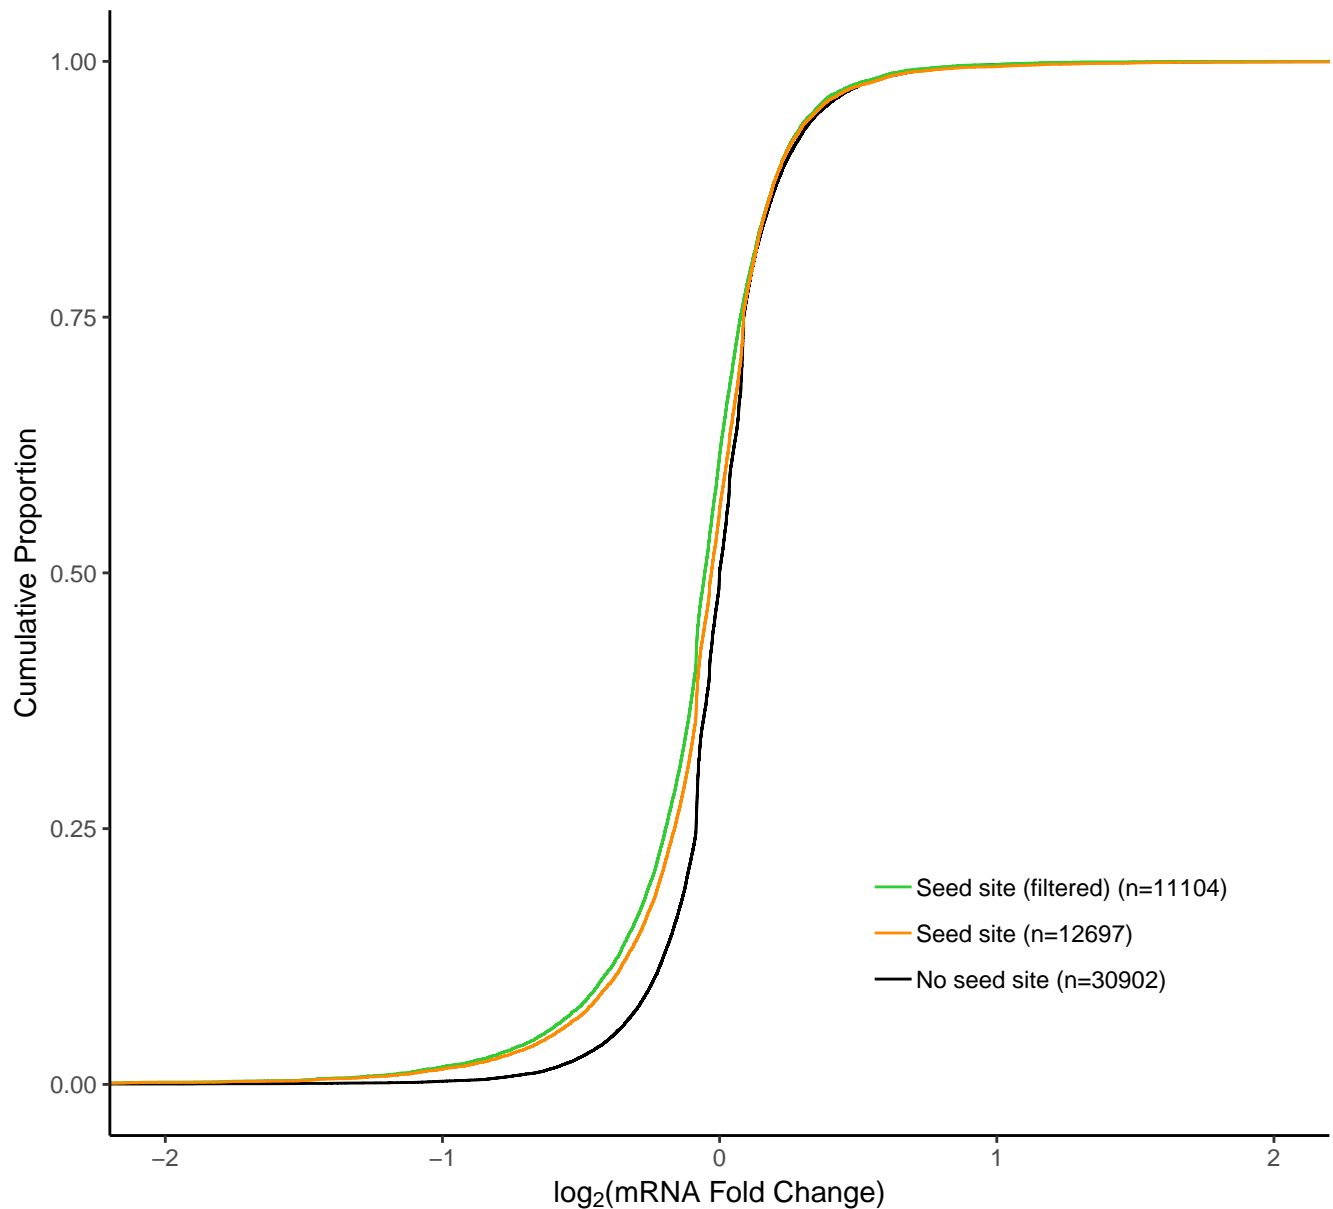

Supplement: Supplementary file [file media-4.pdf]
