# Supplementary material for: FilTar: Using RNA-Seq data to improve microRNA target prediction accuracy in animals
Source: bioRxiv or medRxiv preprint supplement (doi:10.1101/595322), 2019-04-01

# miR-137-3p transfection (U251)

$p \approx 4.72e-05$

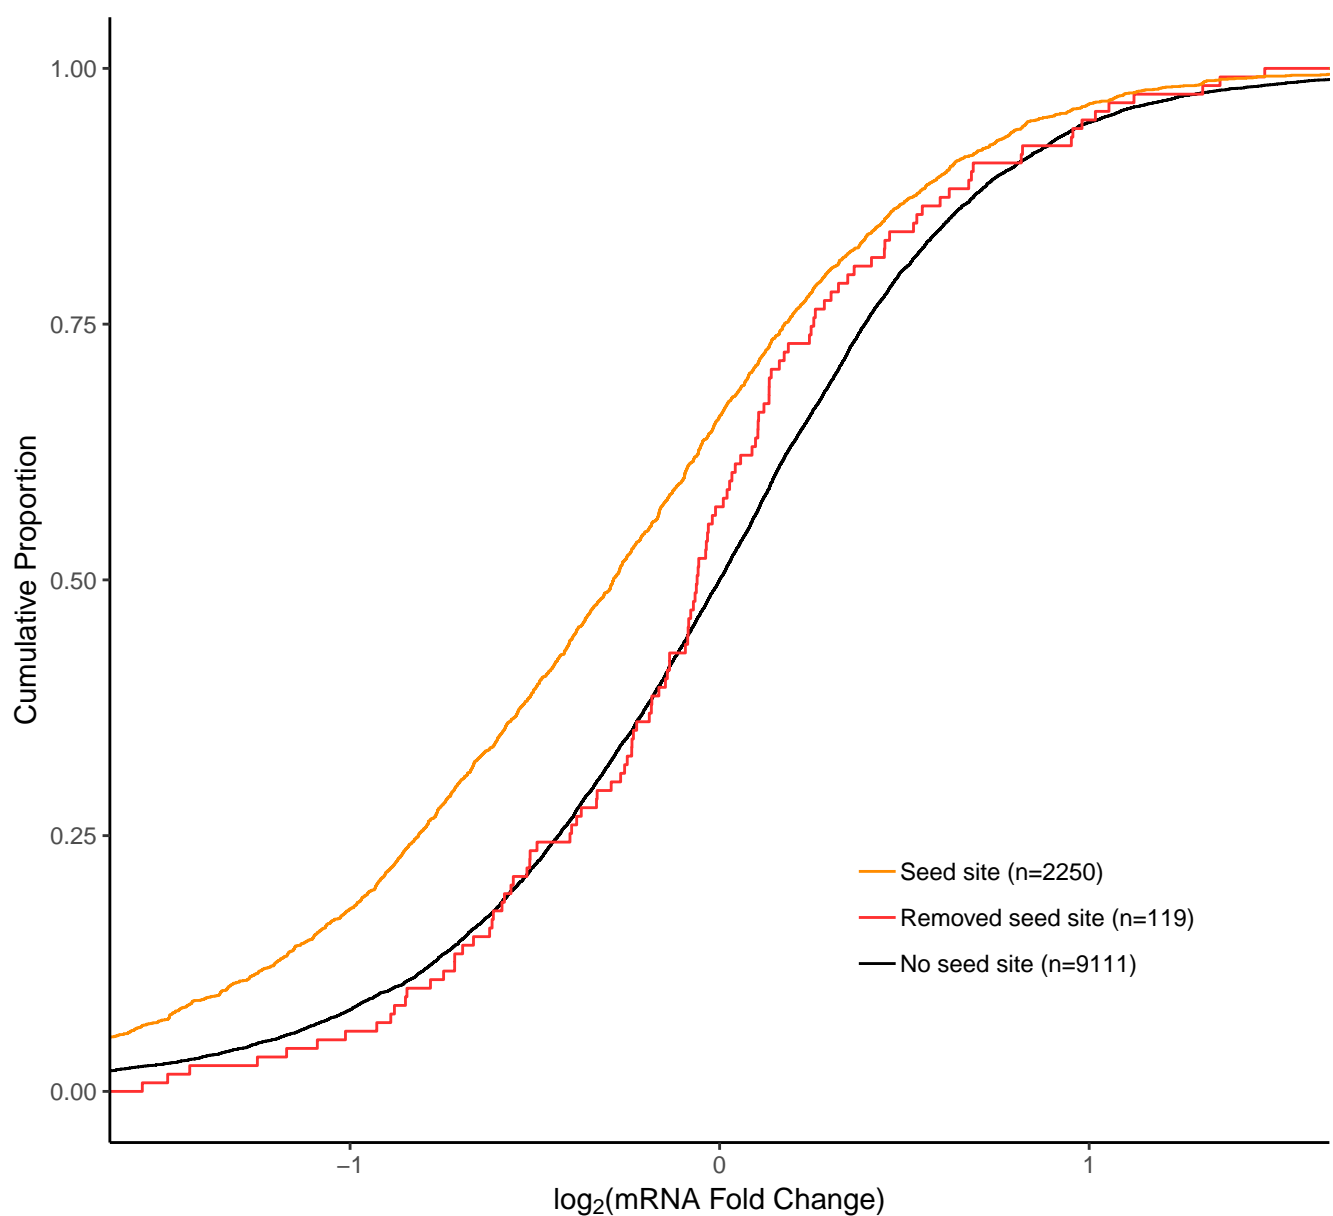

# miR-137-3p transfection (U343)

$p \approx 1.6e-05$

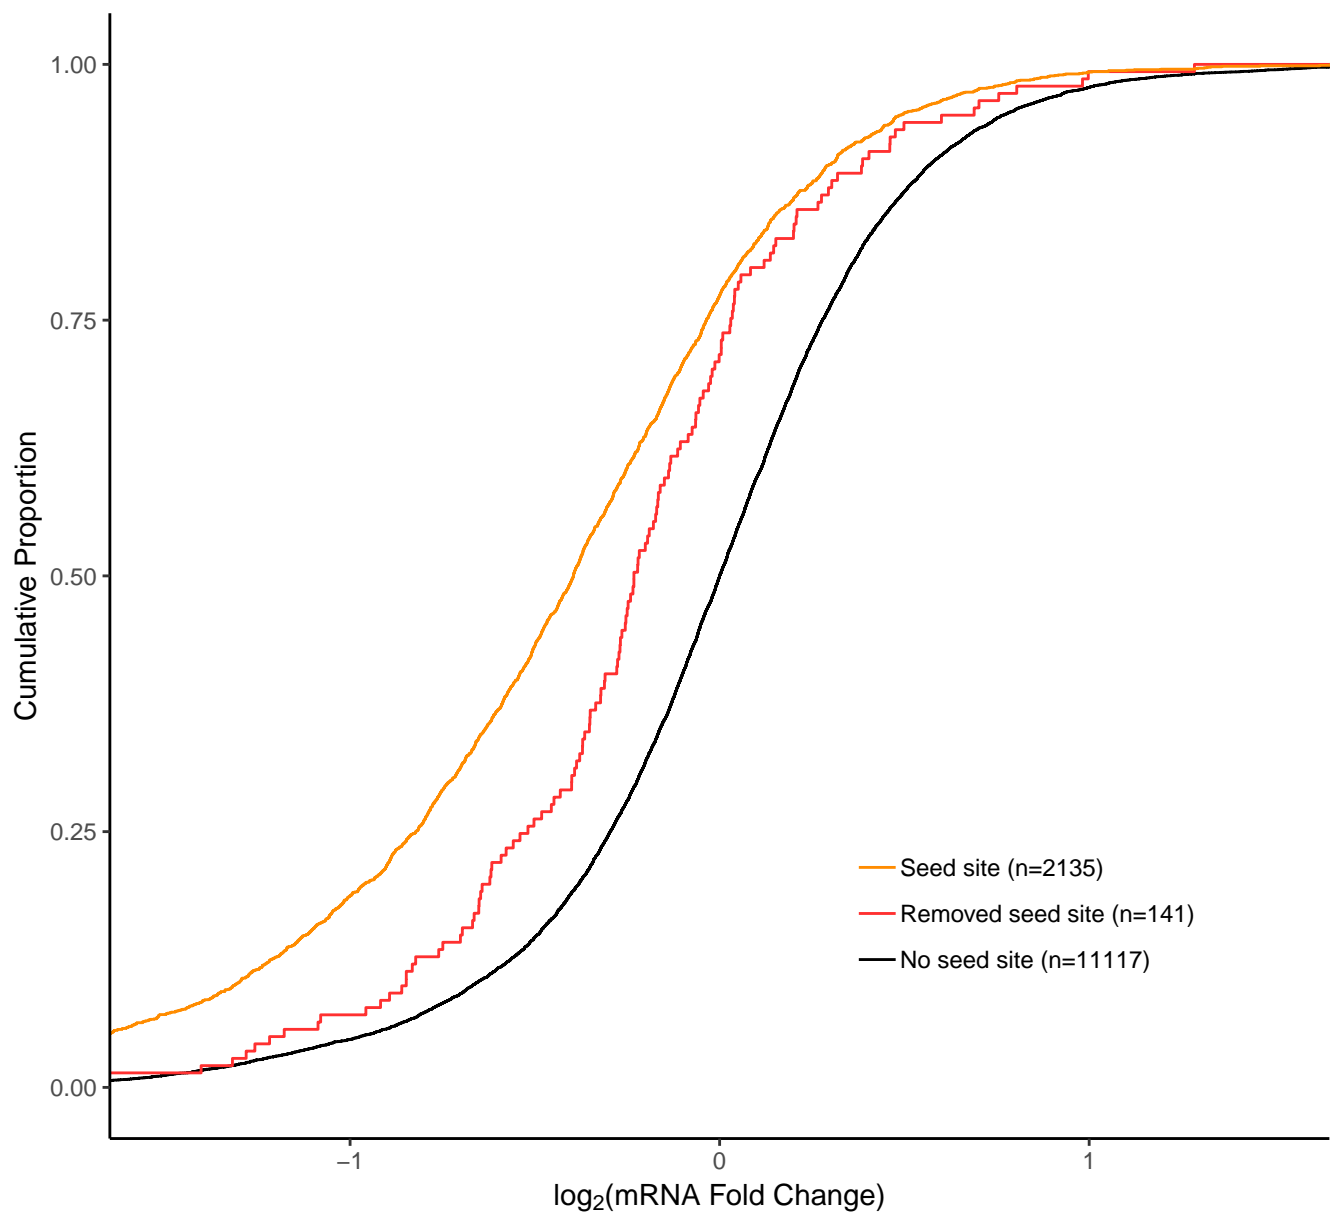

# miR-141-3p transfection (Du145)

$p \approx 3.6e-07$

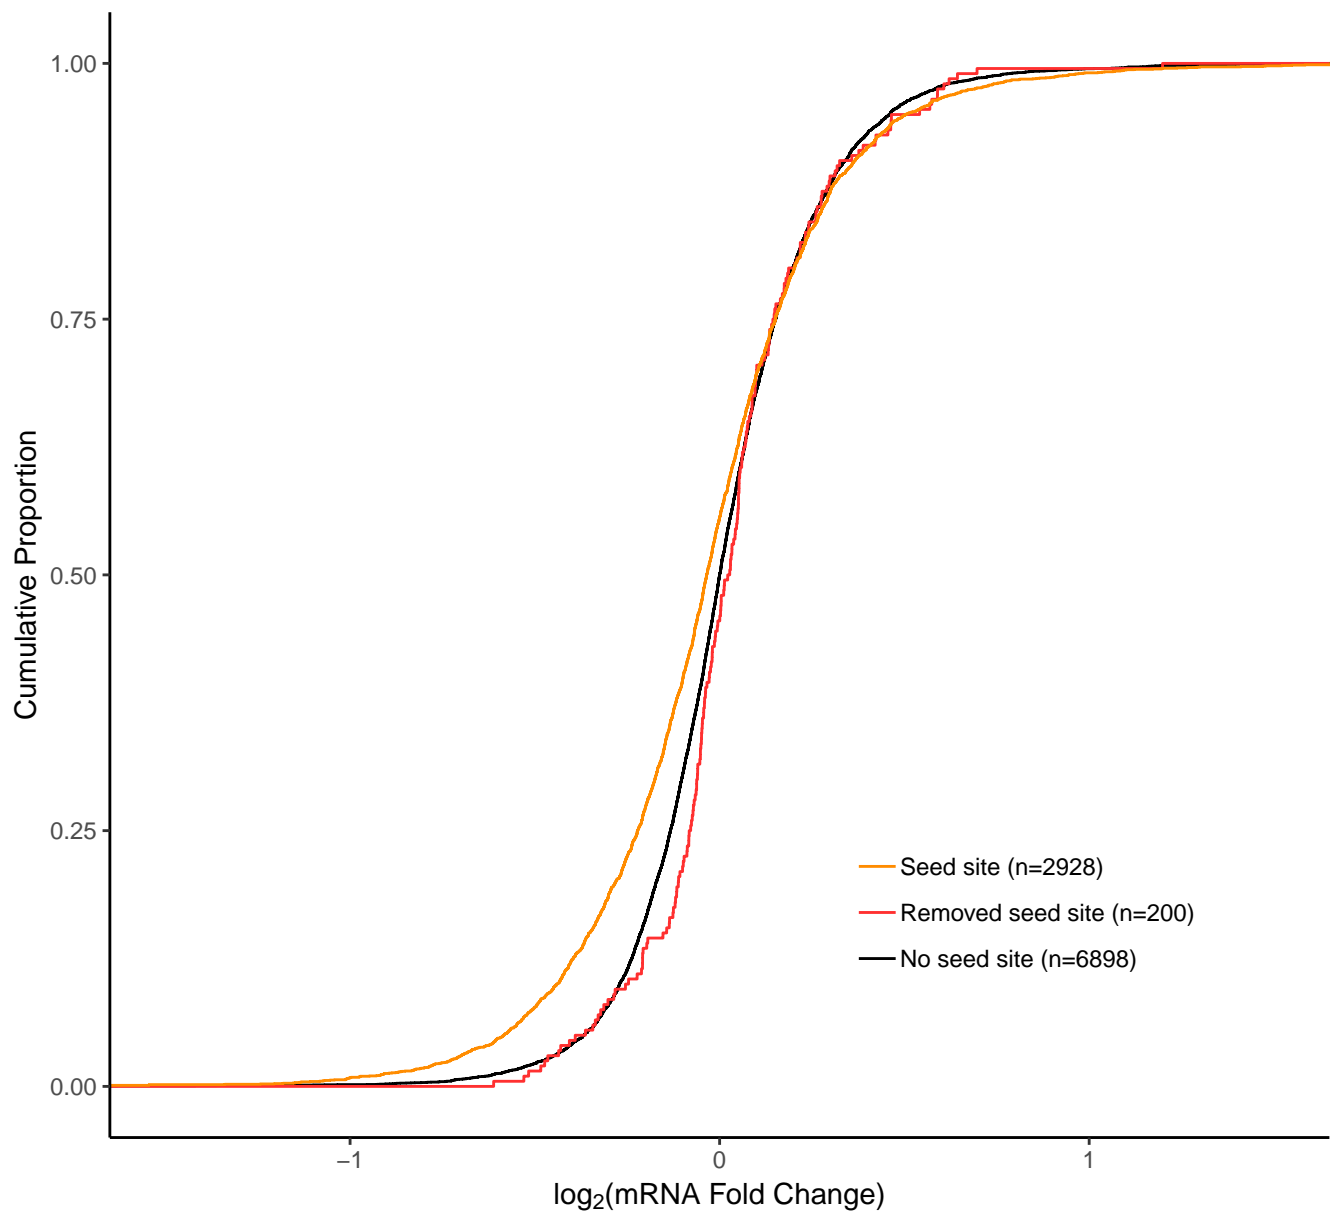

# miR-1343-3p transfection (16HBE14o)

$p \approx 0.0012$

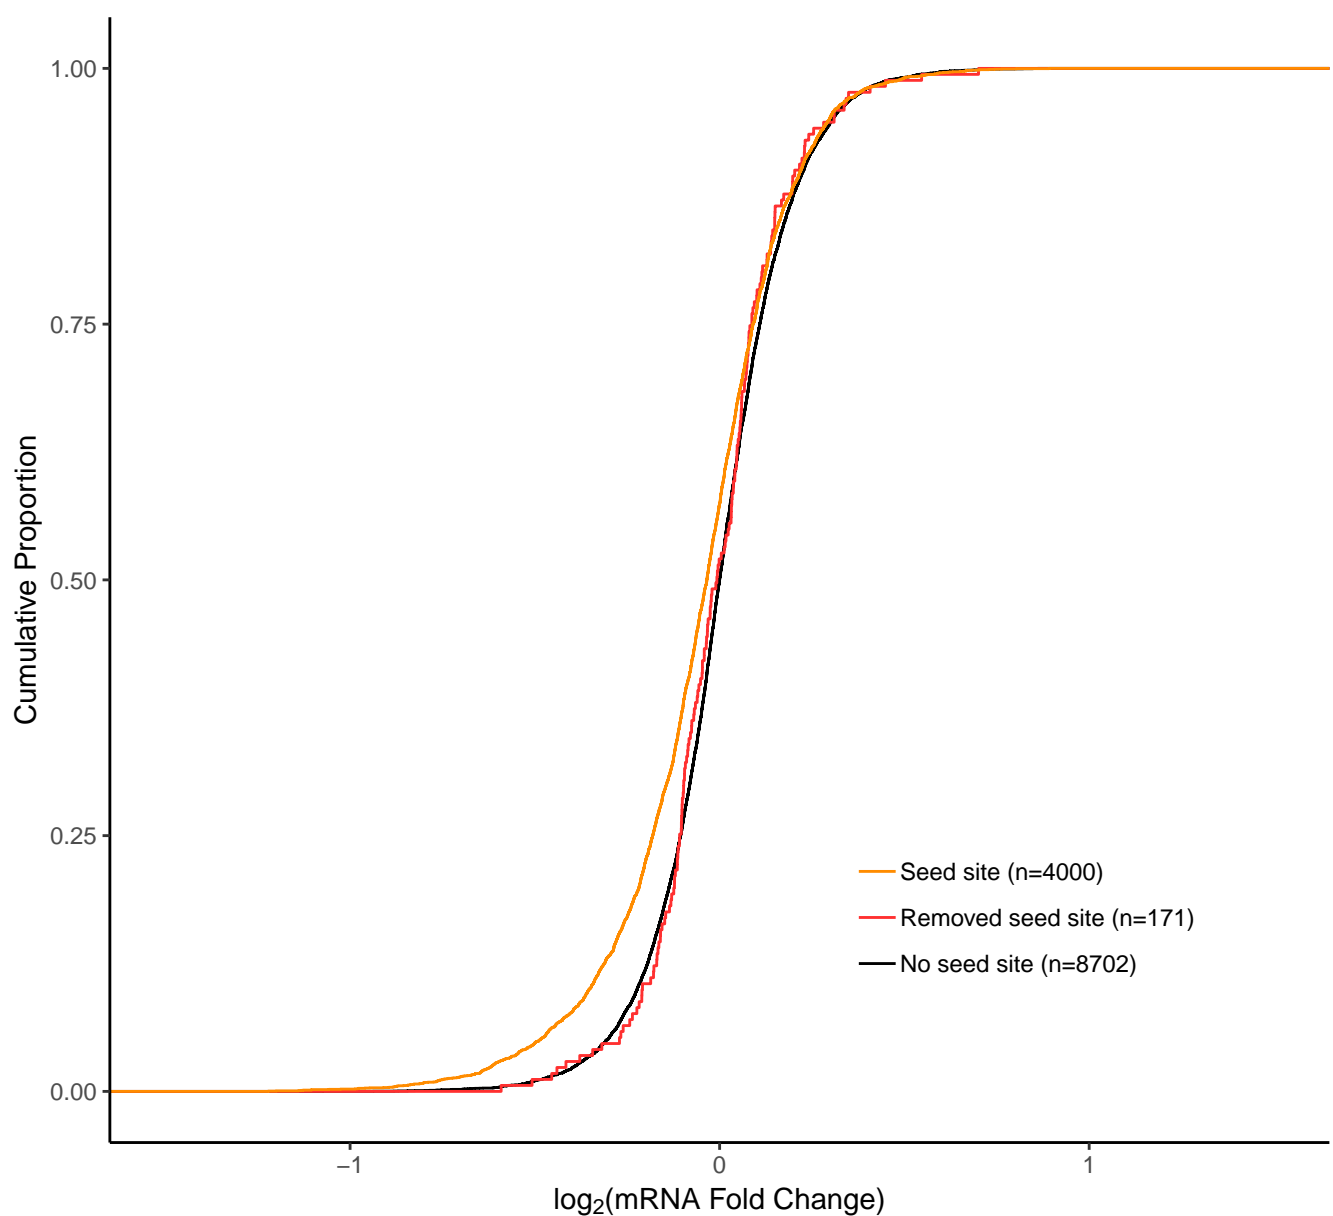

# miR-155-5p transfection (U20S)

$p \approx 4.02e-10$

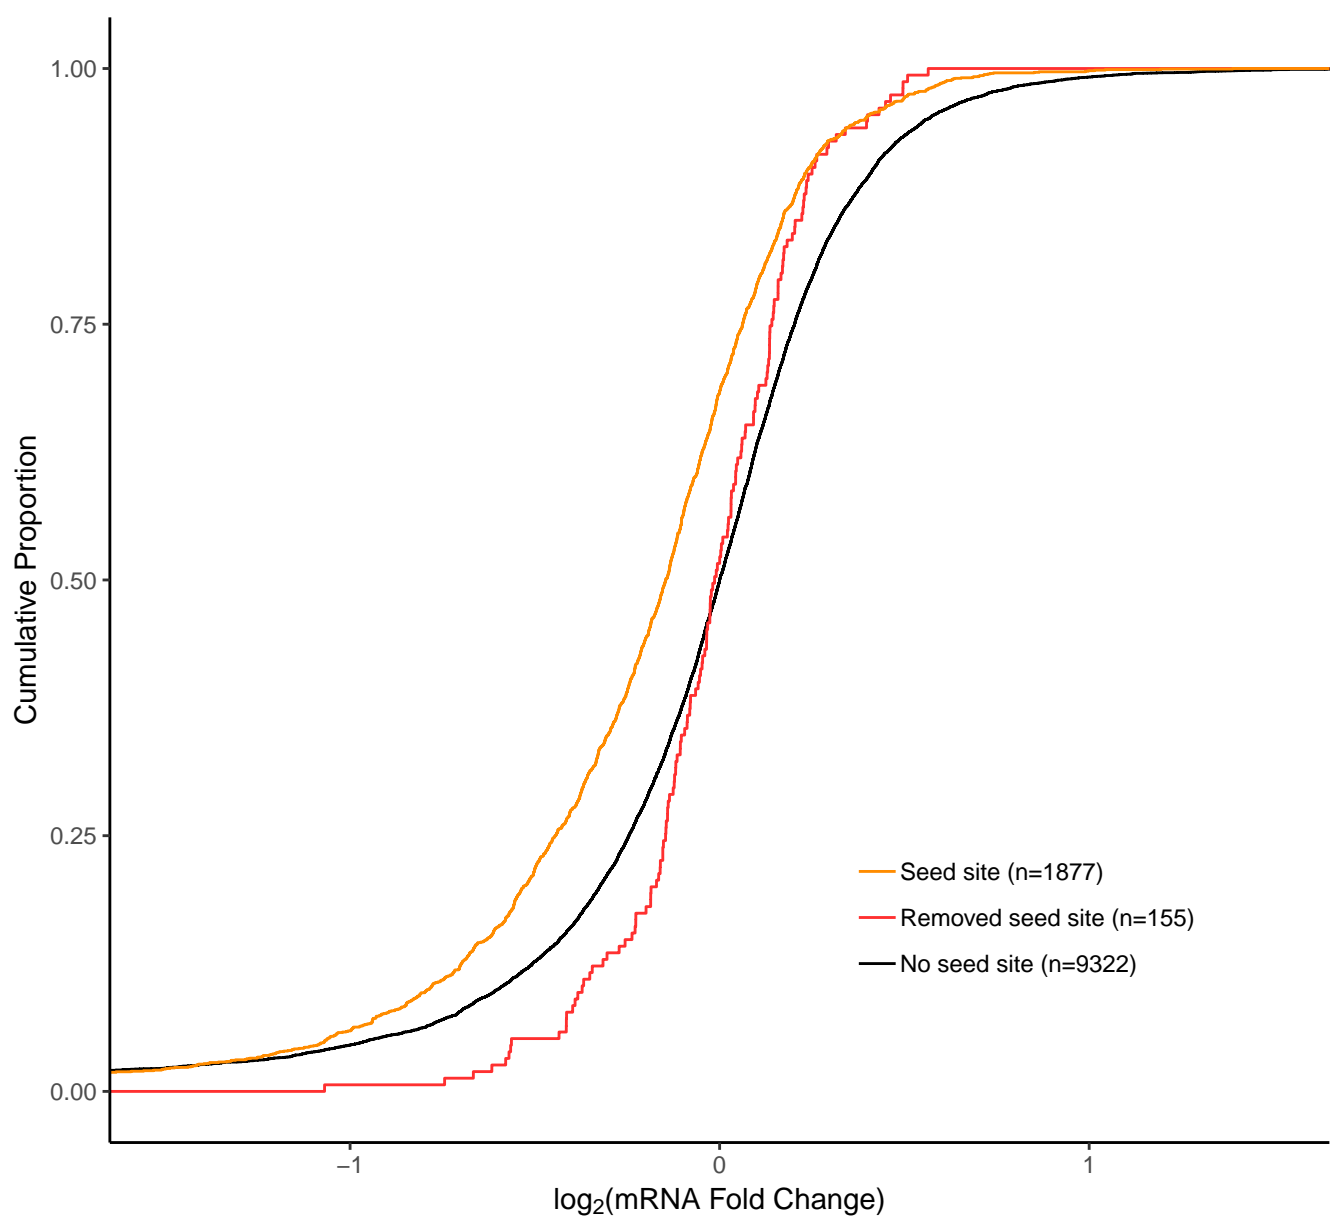

# miR-1-3p transfection (U2OS)

$p \approx 1.03e-05$

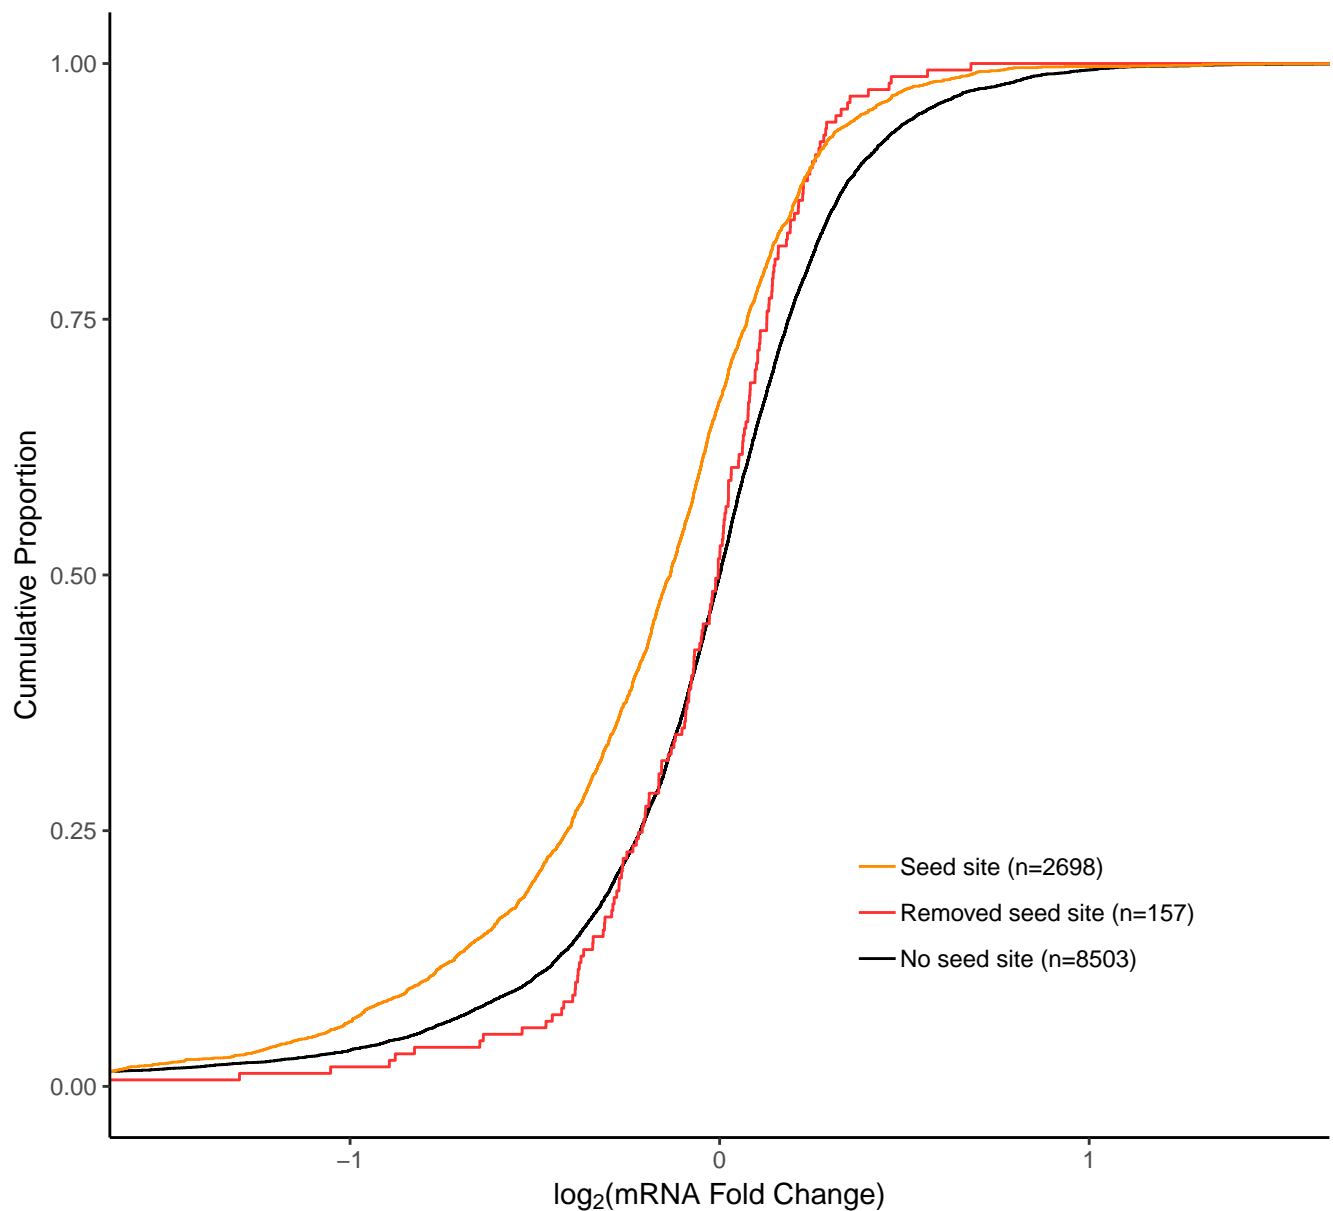

# miR-200b-3p transfection (NMuMG)

$p \approx 6.84e-05$

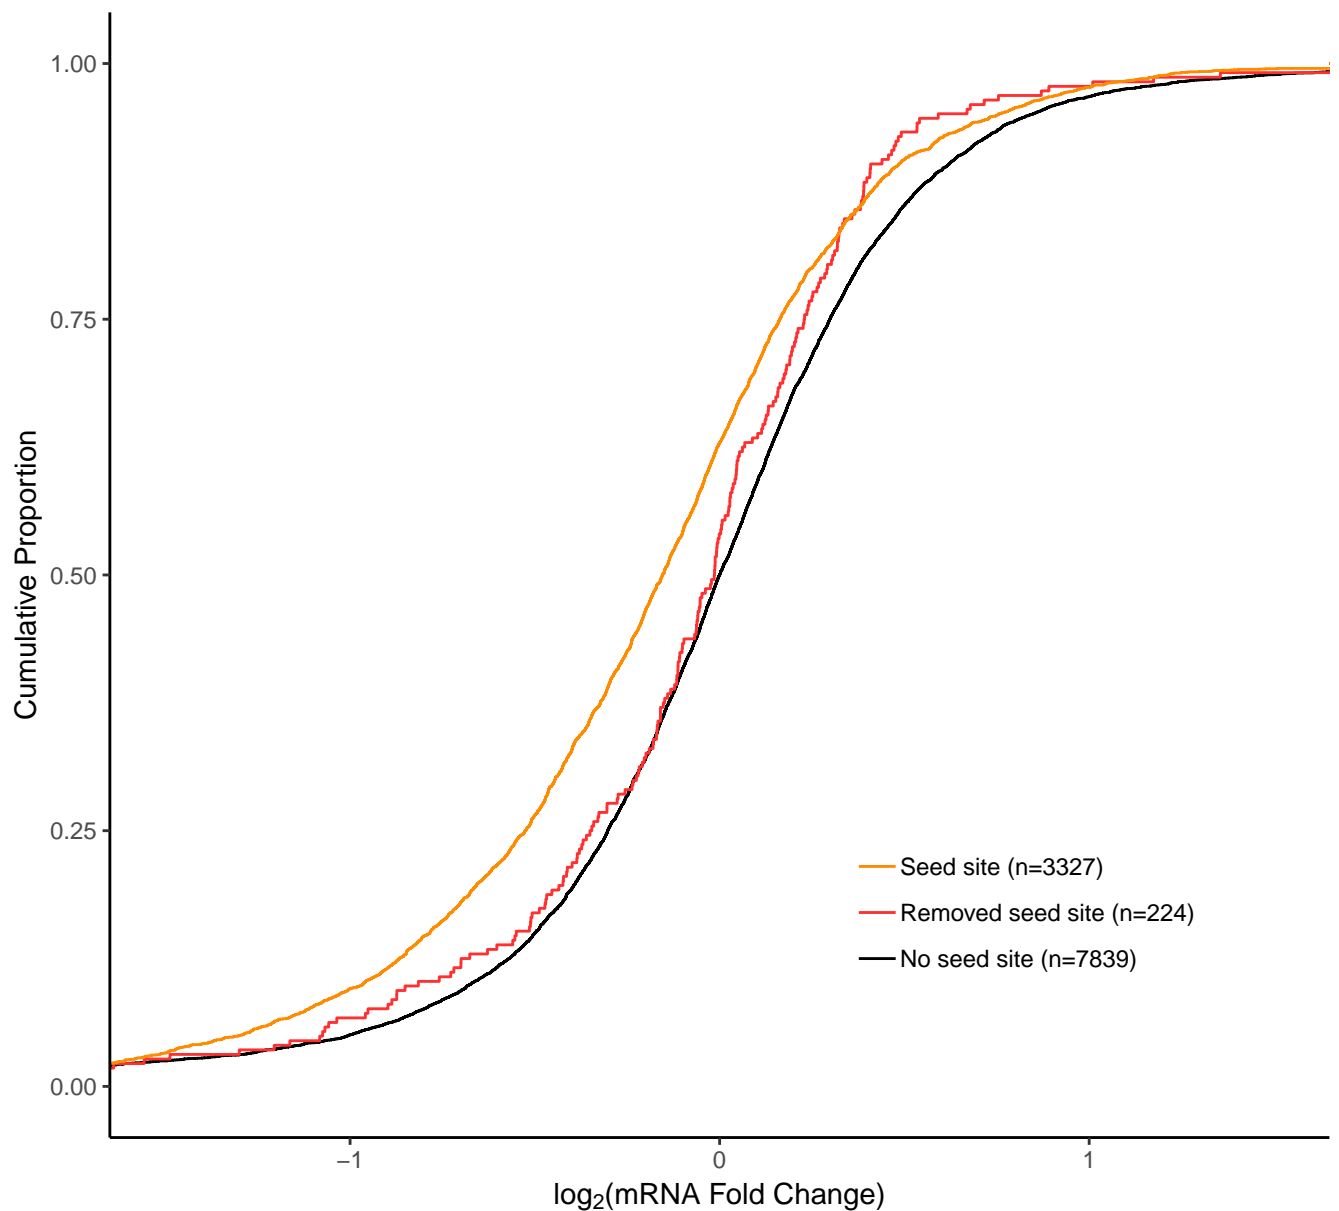

# miR-429-3p transfection (NMuMG)

$p \approx 0.0128$

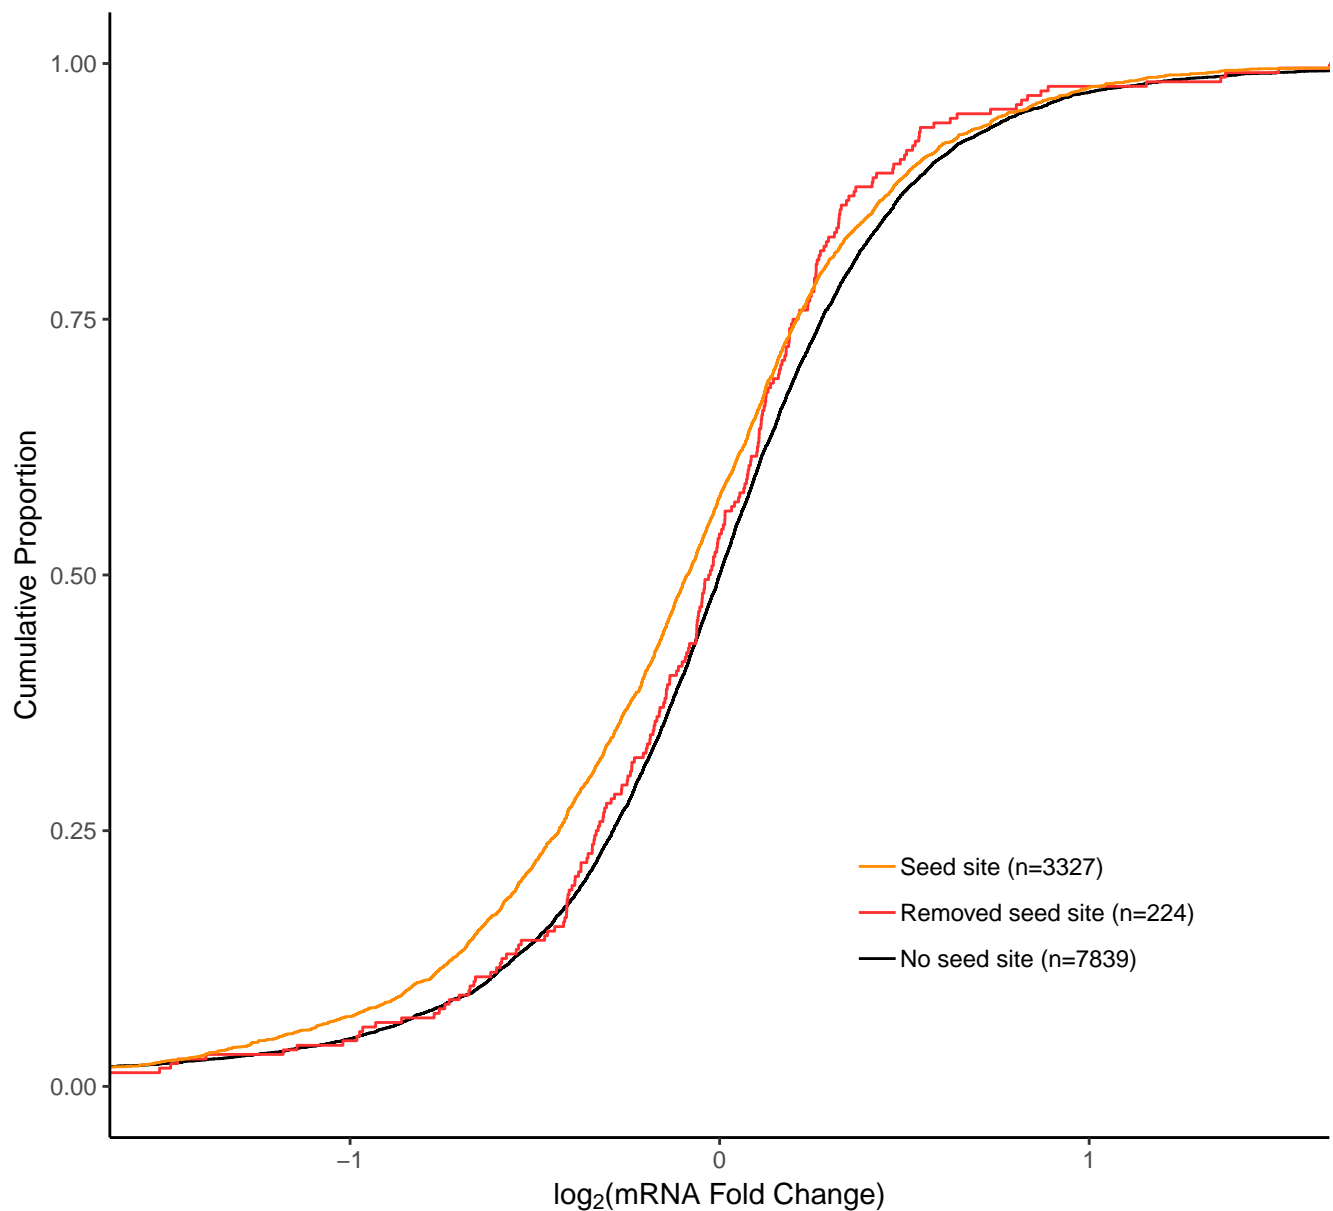



# miR-429-3p transfection (NMuMG)

$p \approx 0.0128$

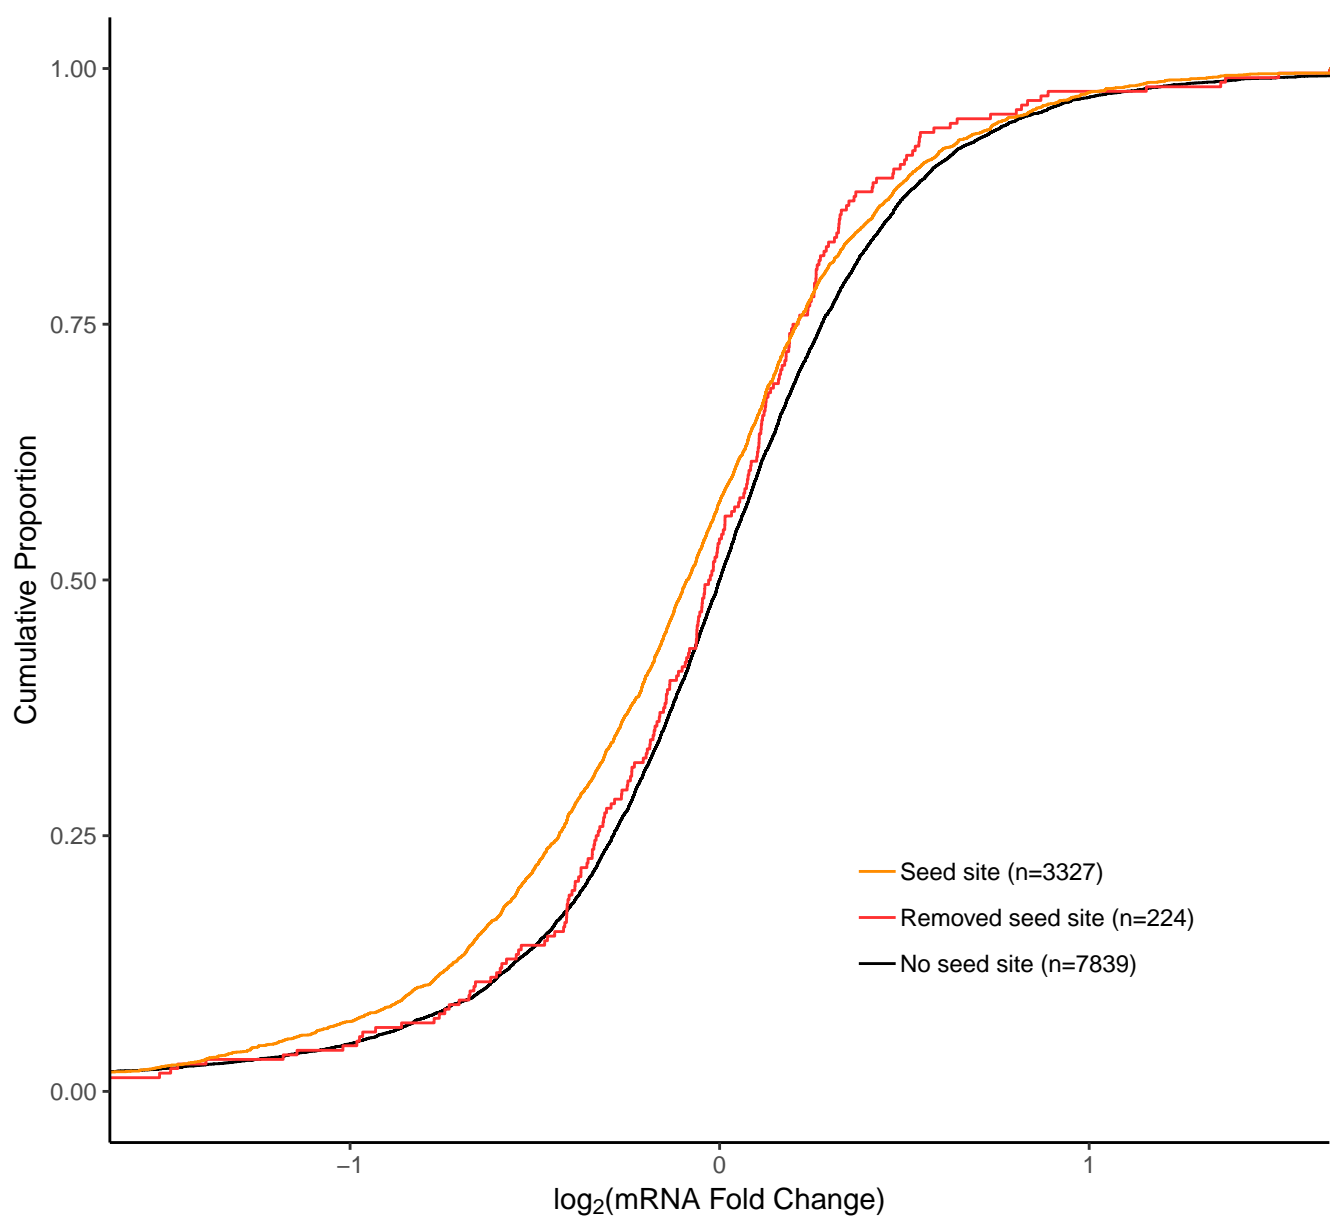

# miR-24-3p transfection (CD4)

$p \approx 5e-05$

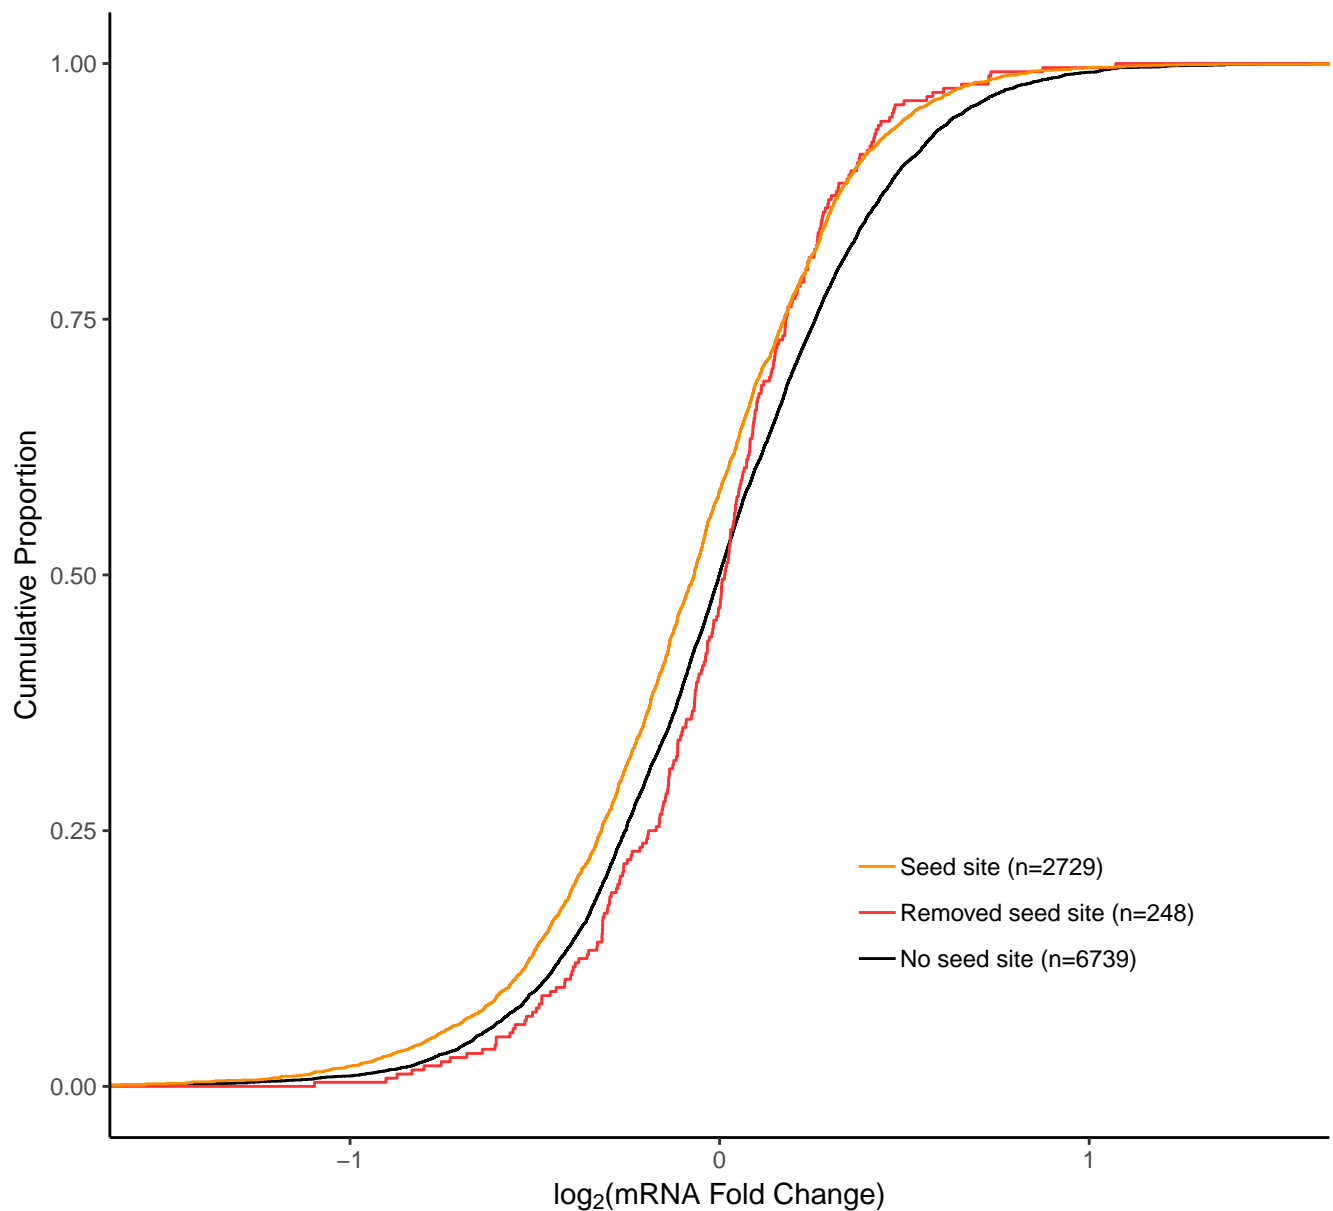

# miR-27a-3p transfection (CD4)

$p \approx 0.0458$

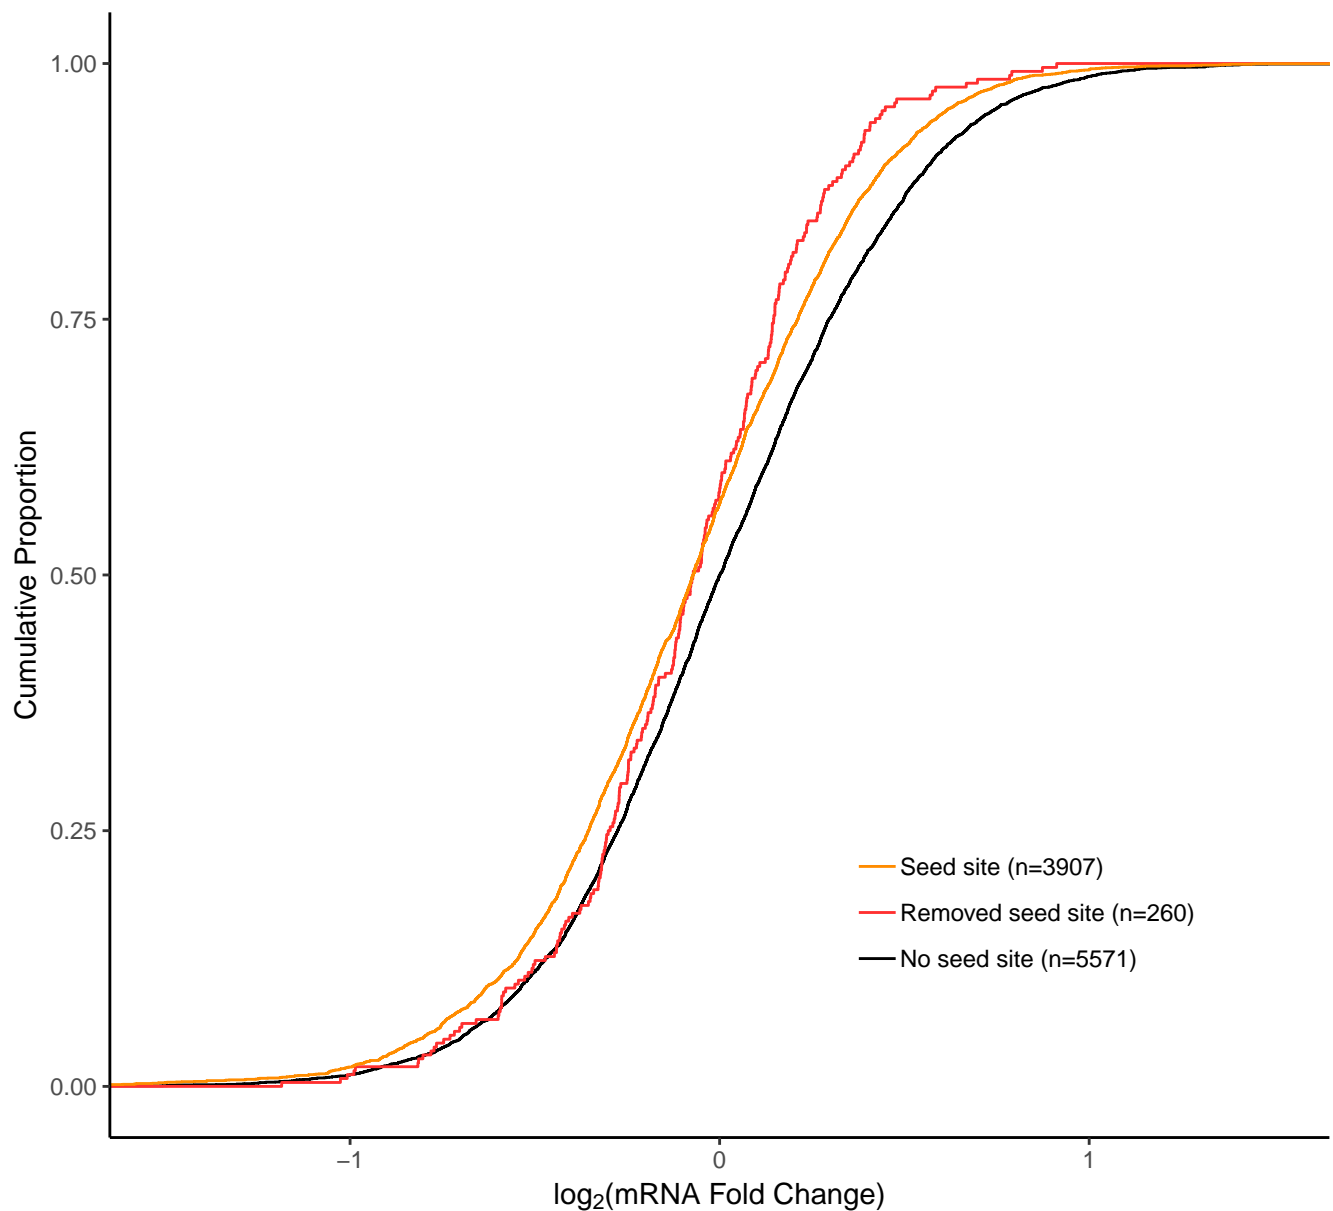

# miR-23a-3p transfection (CD4)

$p \approx 0.182$

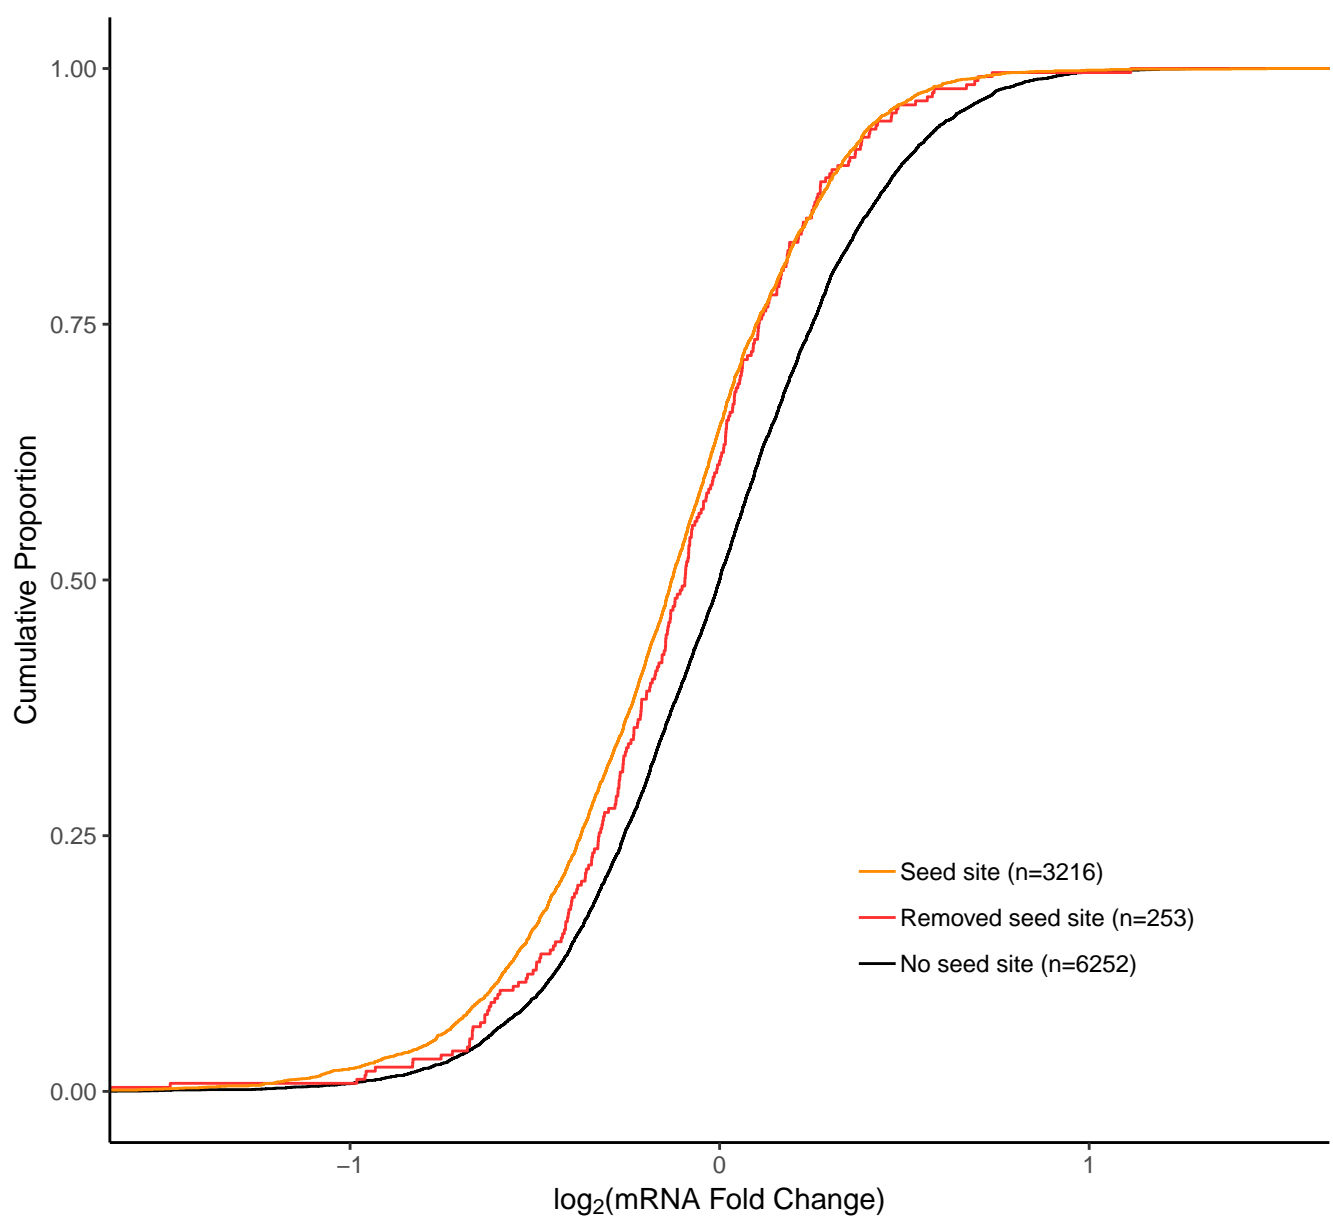

# let-7c-5p transfection (HeLa)

$p \approx 0.00583$

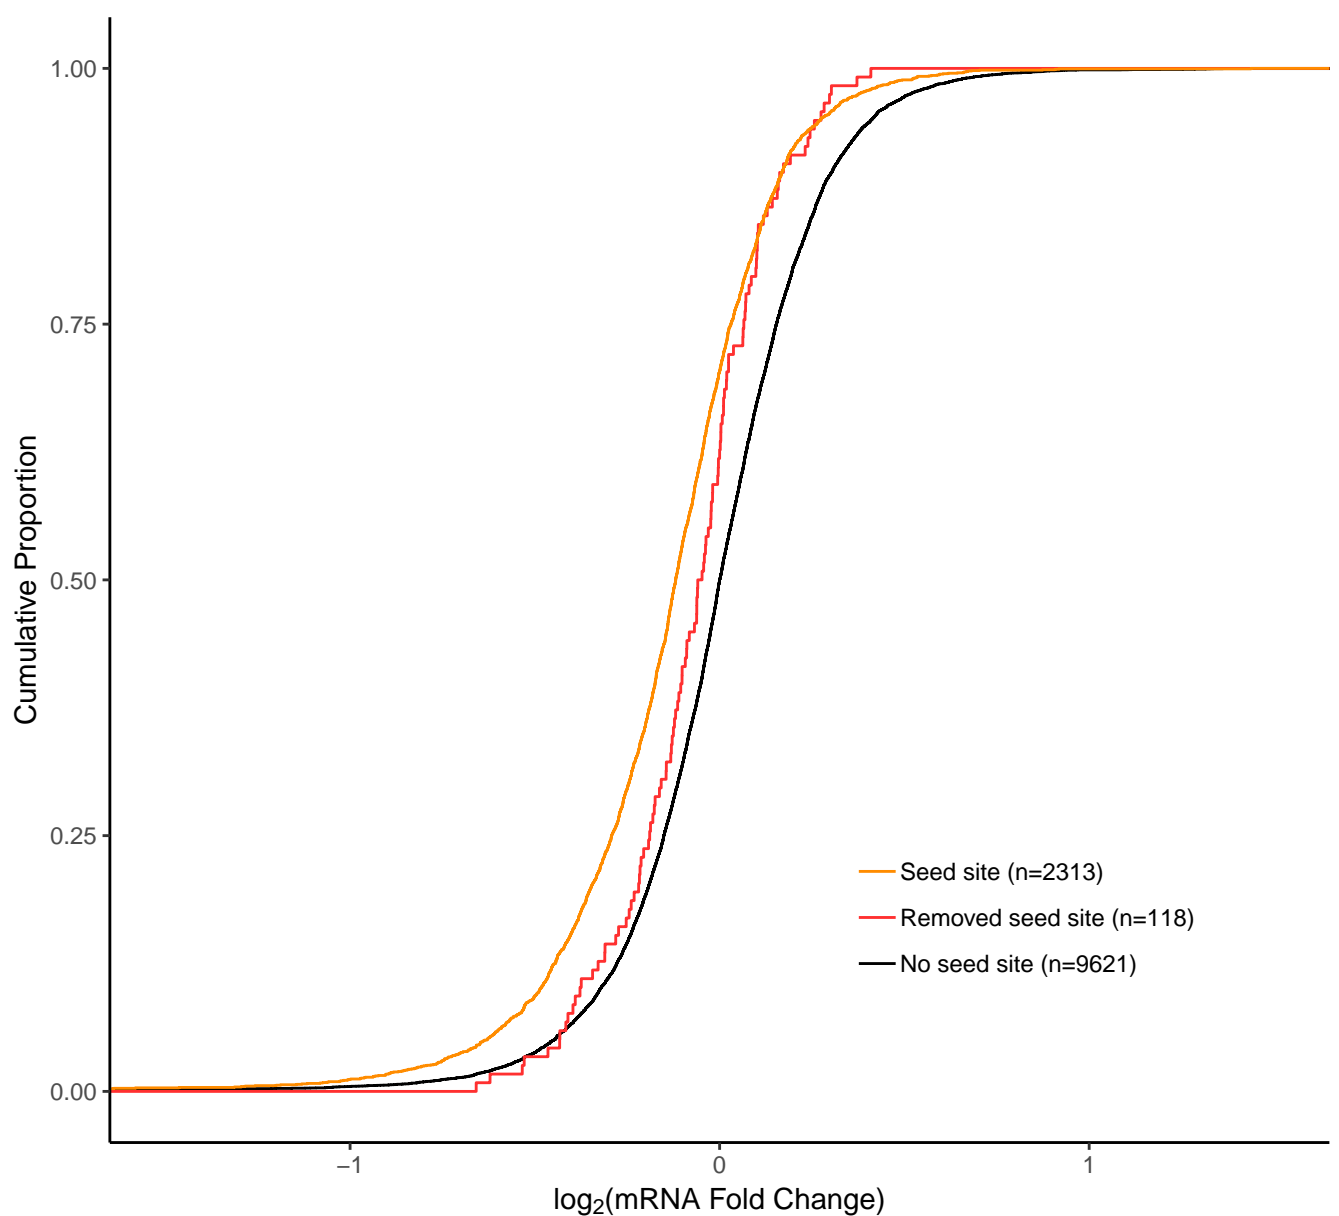

# miR-107 transfection (HeLa)

$p \approx 0.00401$

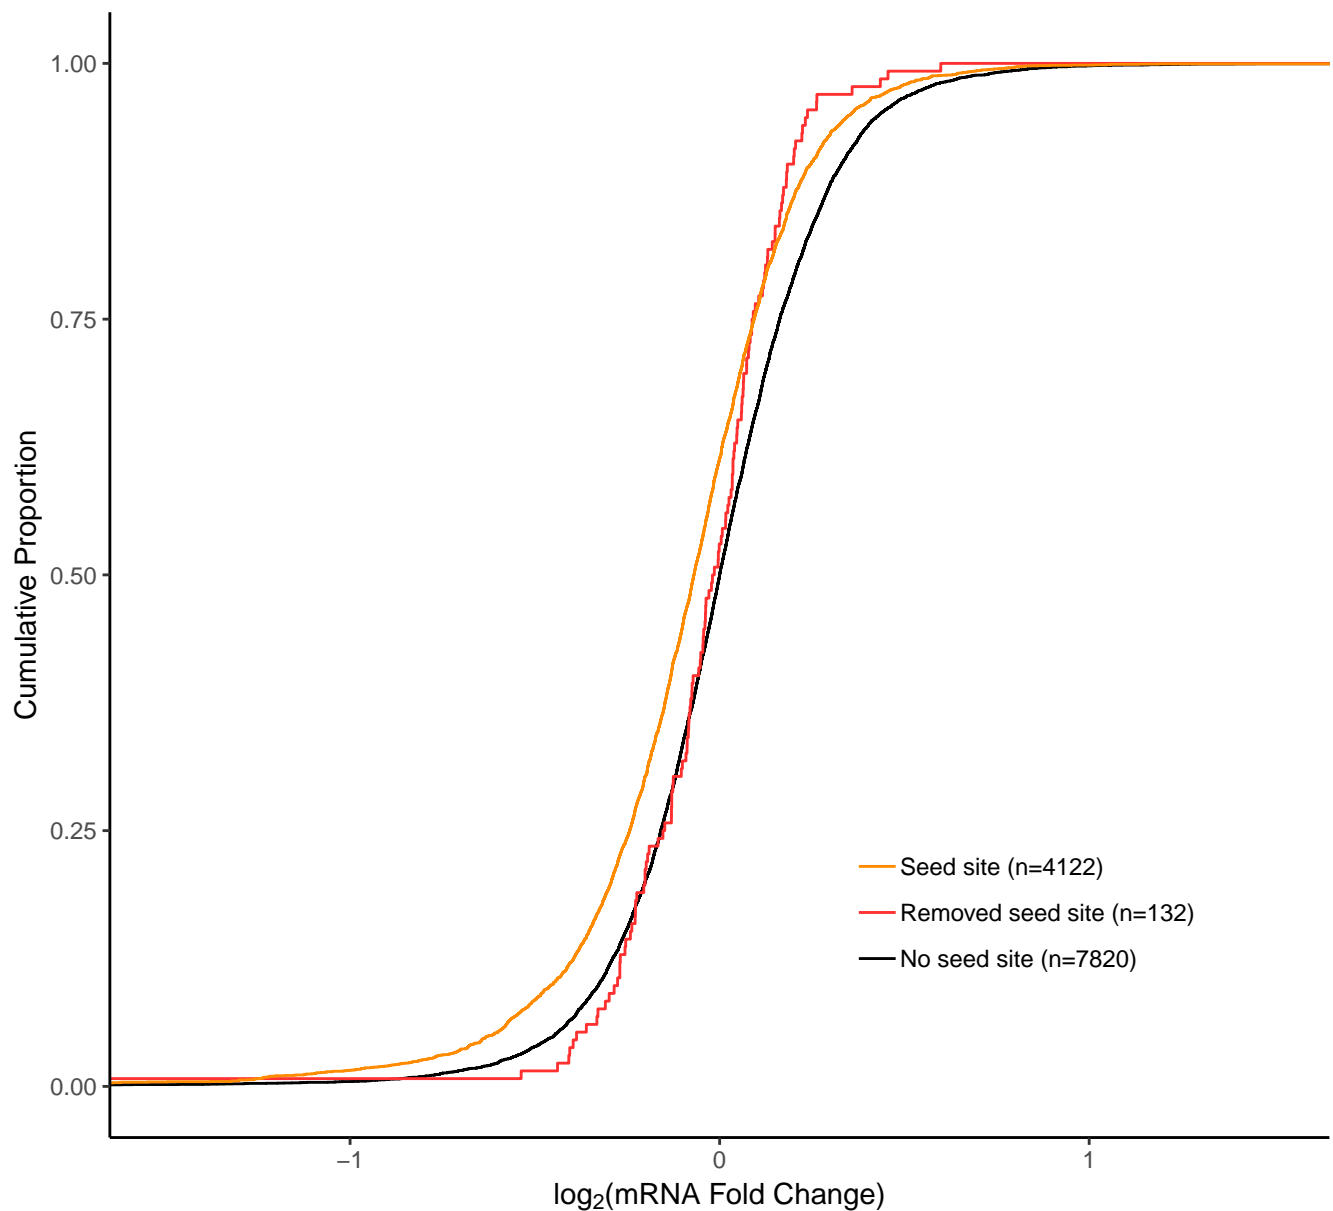

# miR-10a-5p transfection (HeLa)

$p \approx 0.0244$

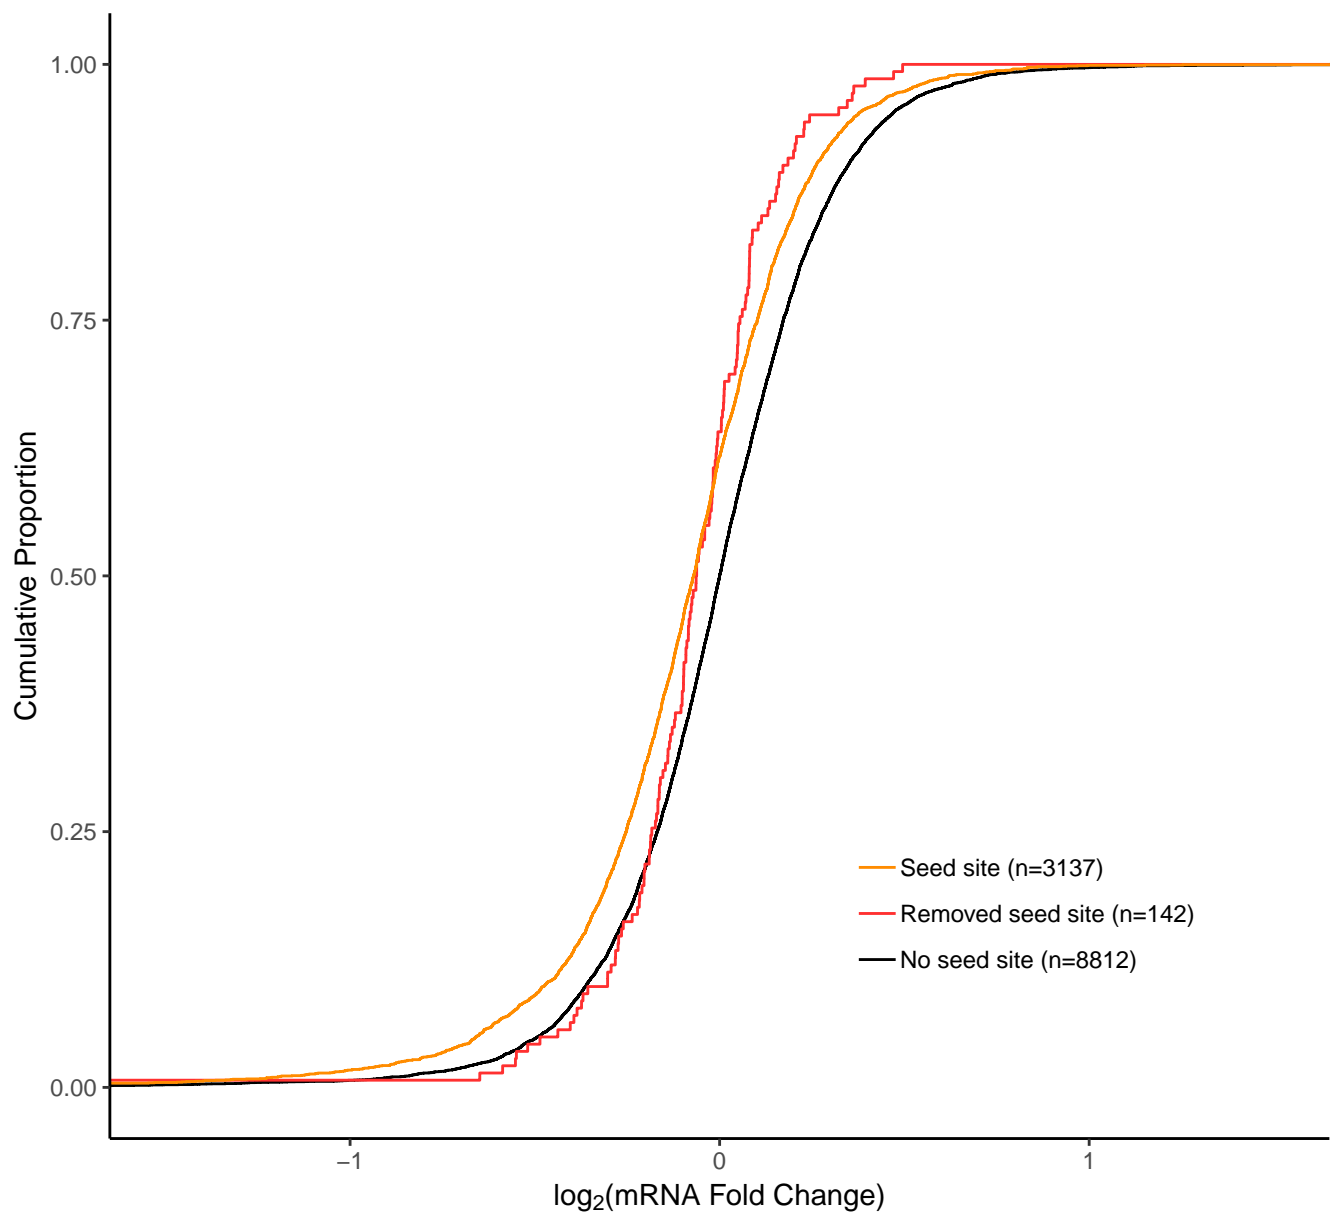

# miR-124-3p transfection (HeLa)

$p \approx 0.00022$

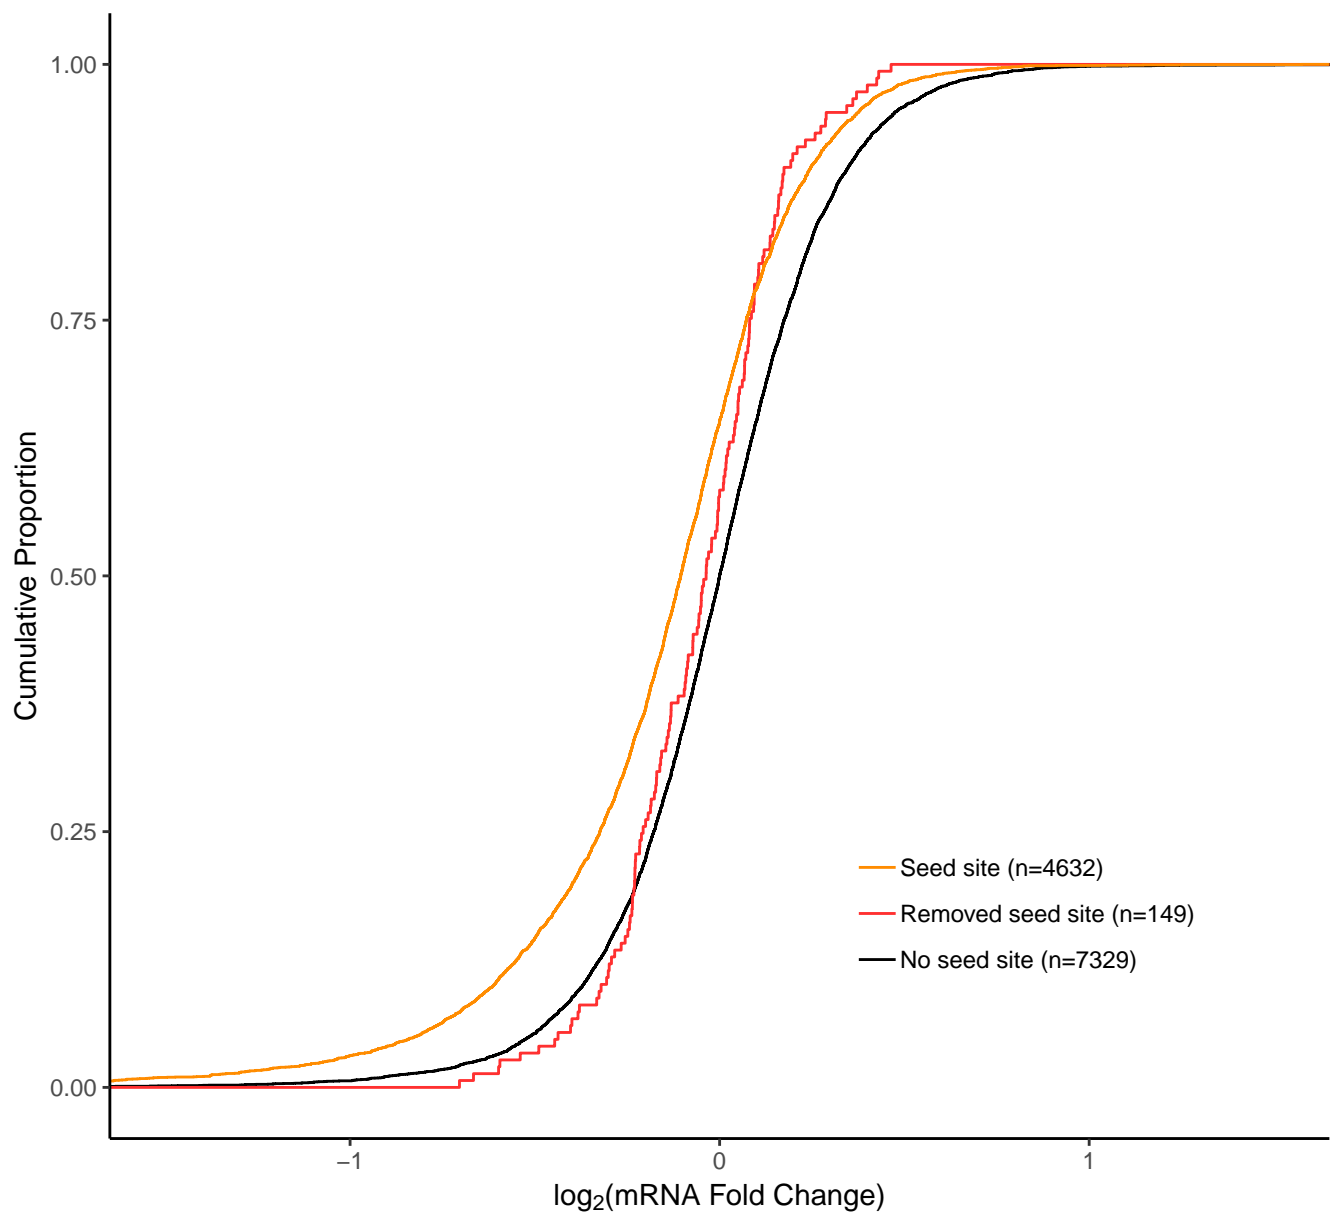



# miR-126-3p transfection (HeLa)

$p \approx 0.037$

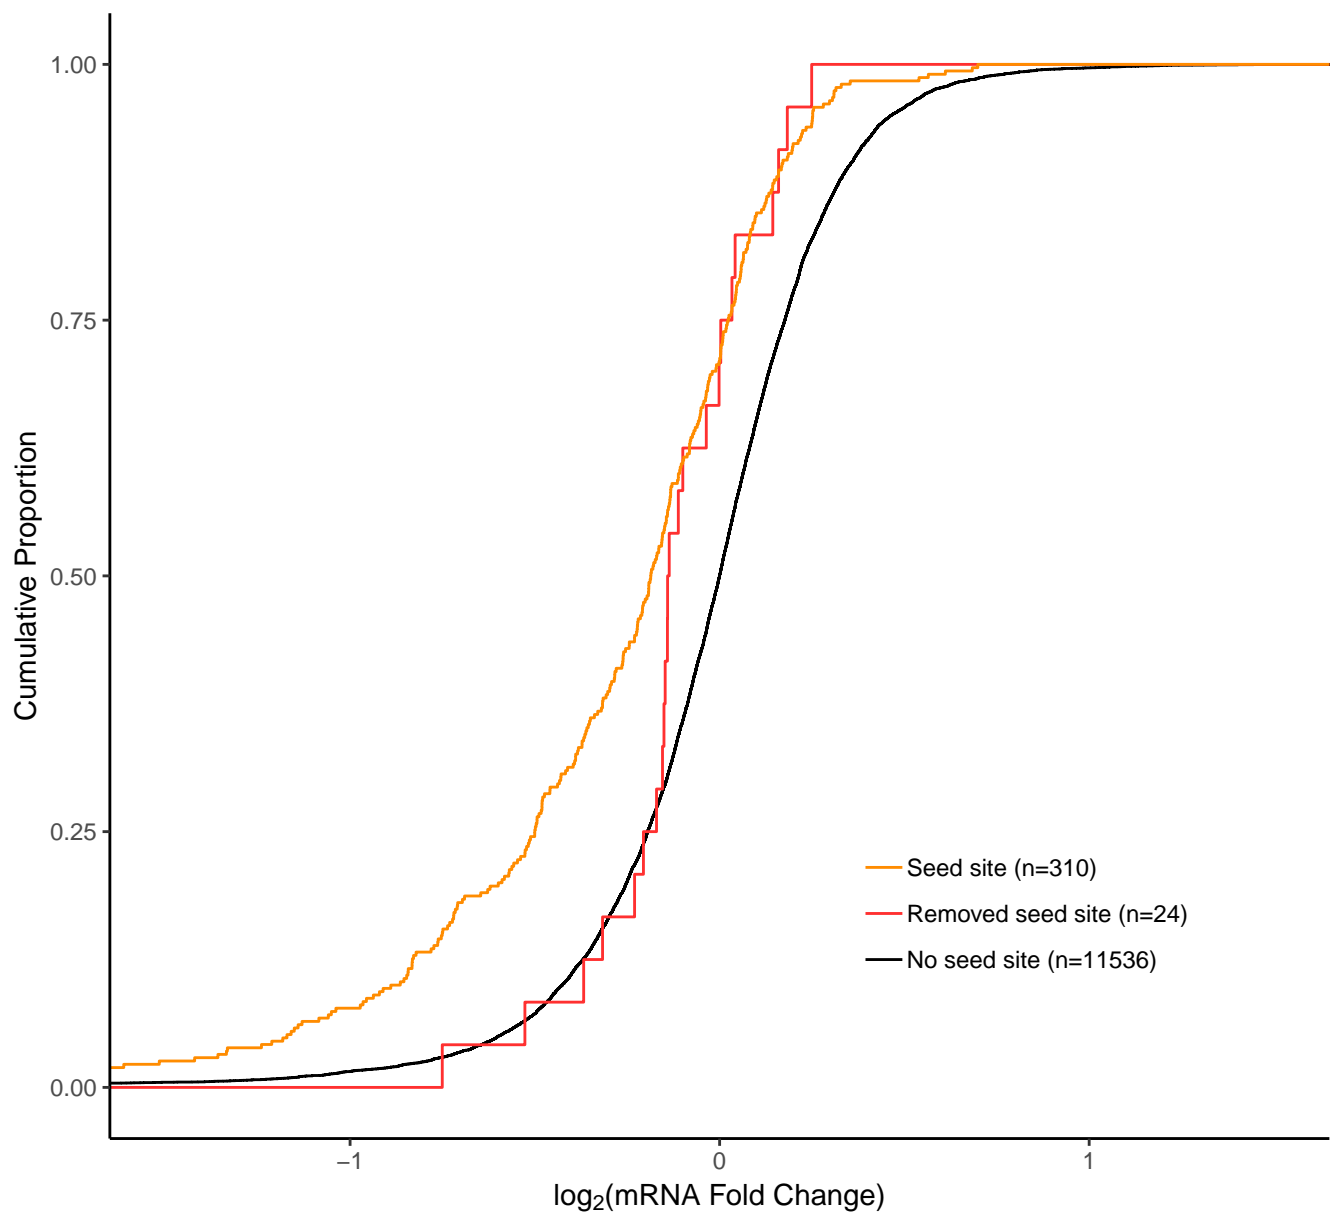

# miR-126-5p transfection (HeLa)

$p \approx 9.07e-08$

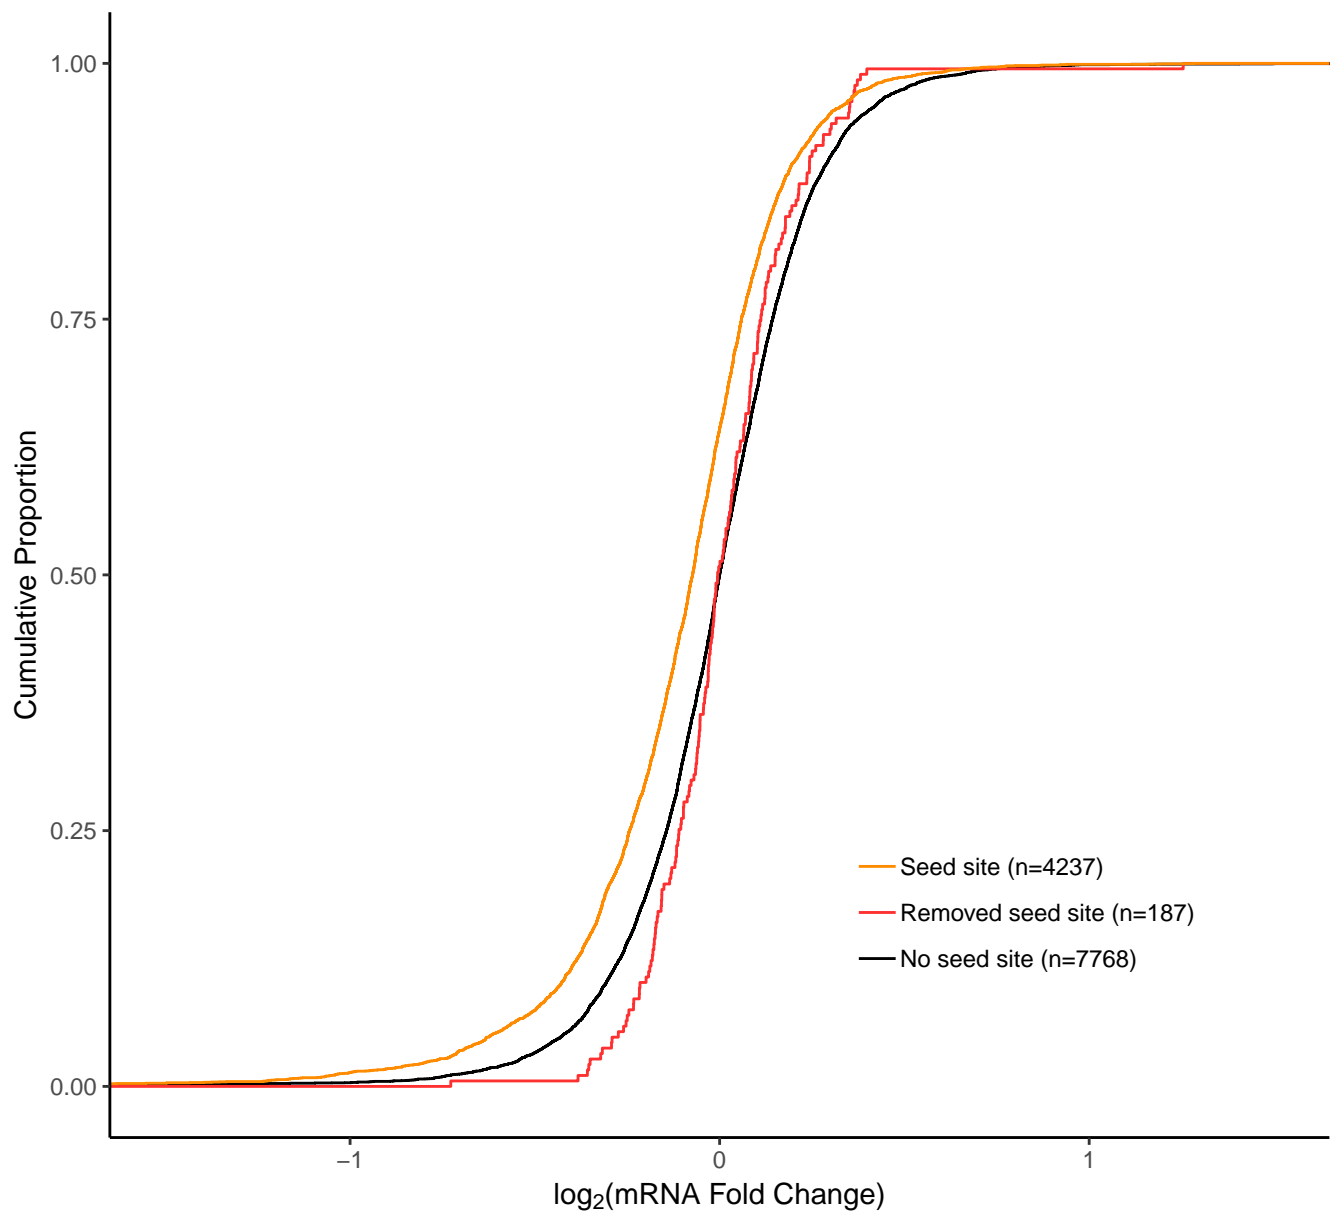

# miR-133b transfection (HeLa)

$p \approx 0.000566$

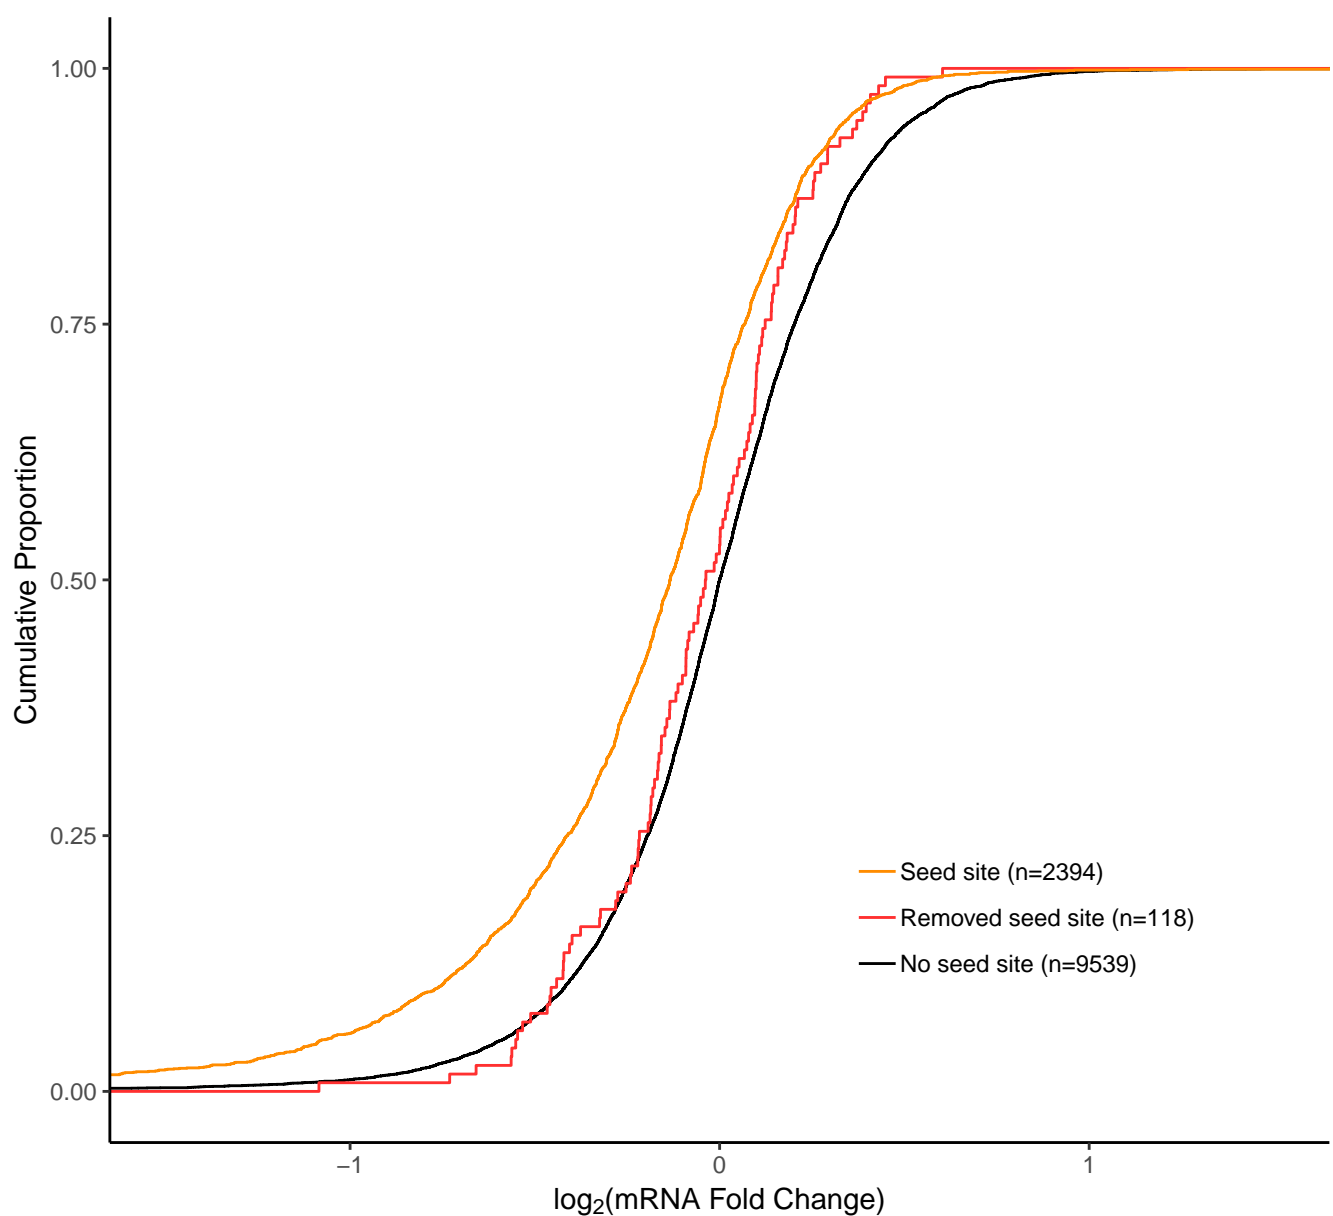

# miR-142-3p transfection (HeLa)

$p \approx 0.000302$

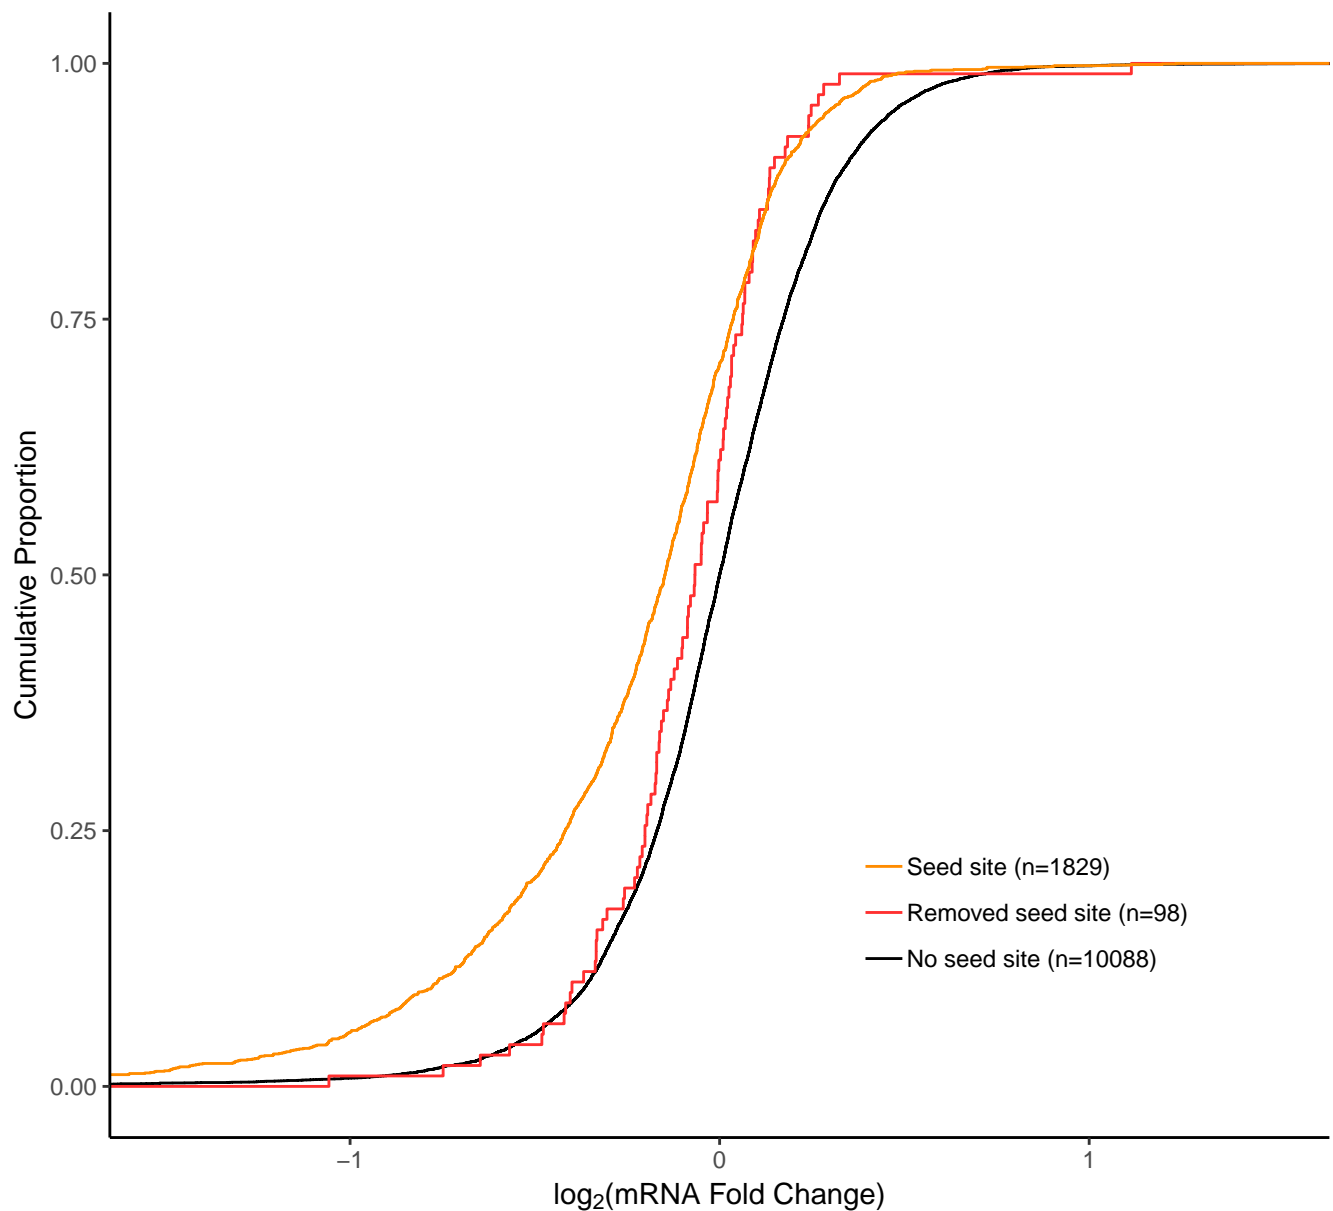

# miR-145-5p transfection (HeLa)

$p \approx 0.0196$

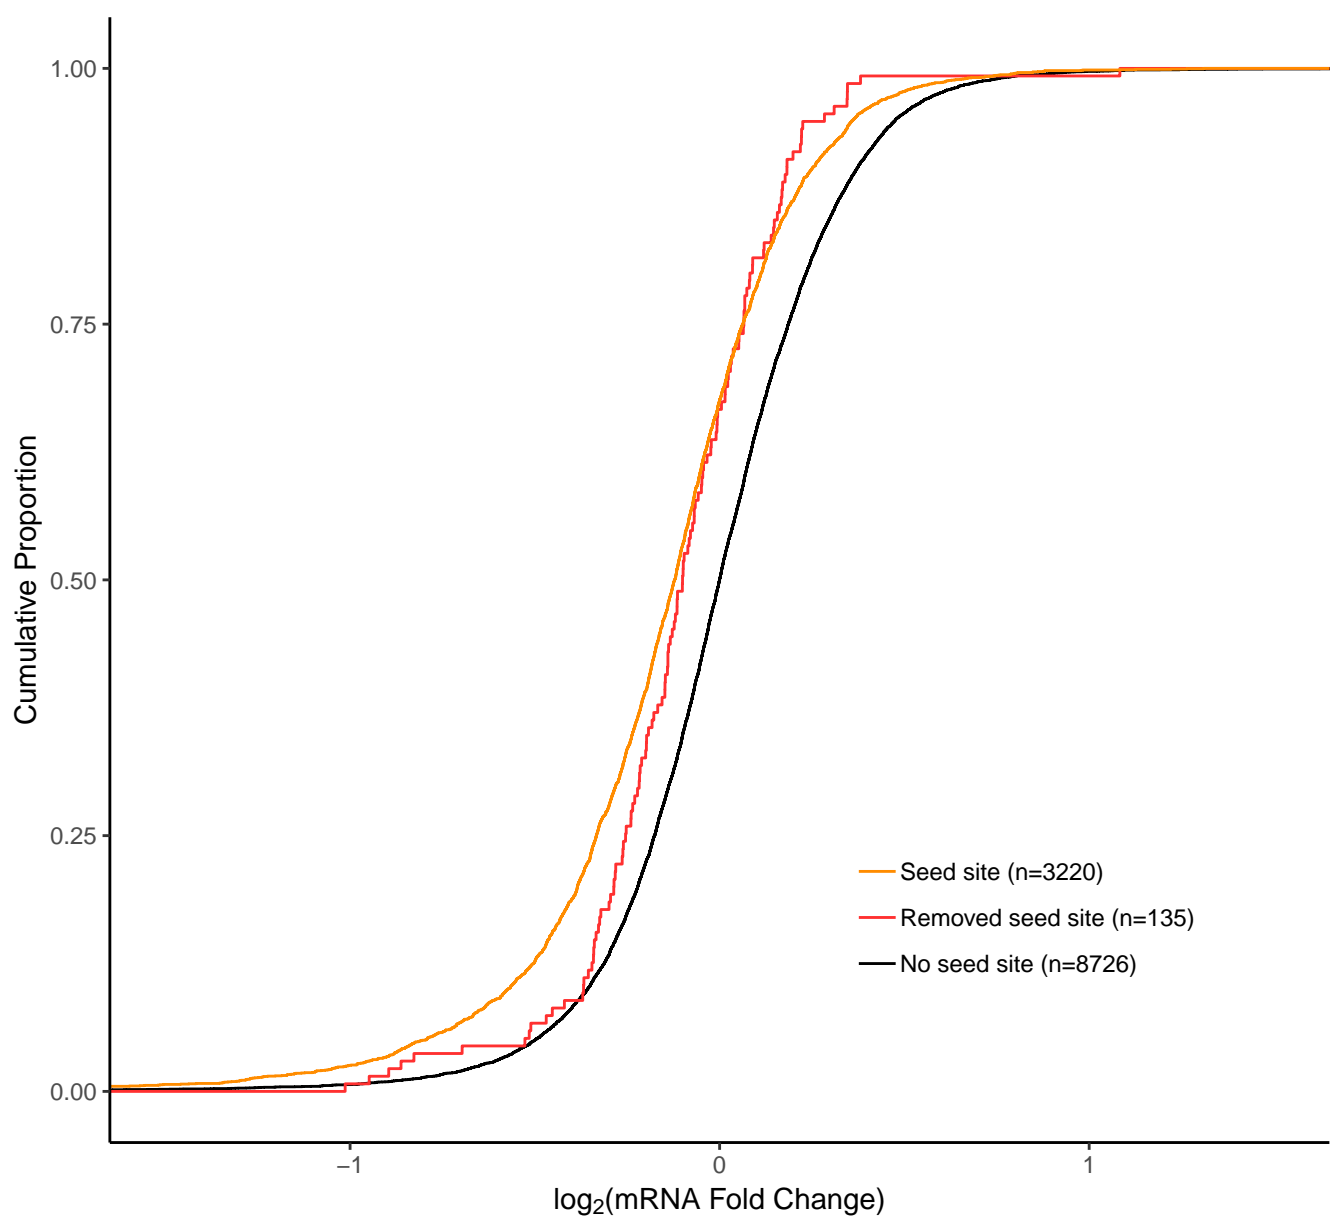

# miR-146a-5p transfection (HeLa)

$p \approx 0.00121$

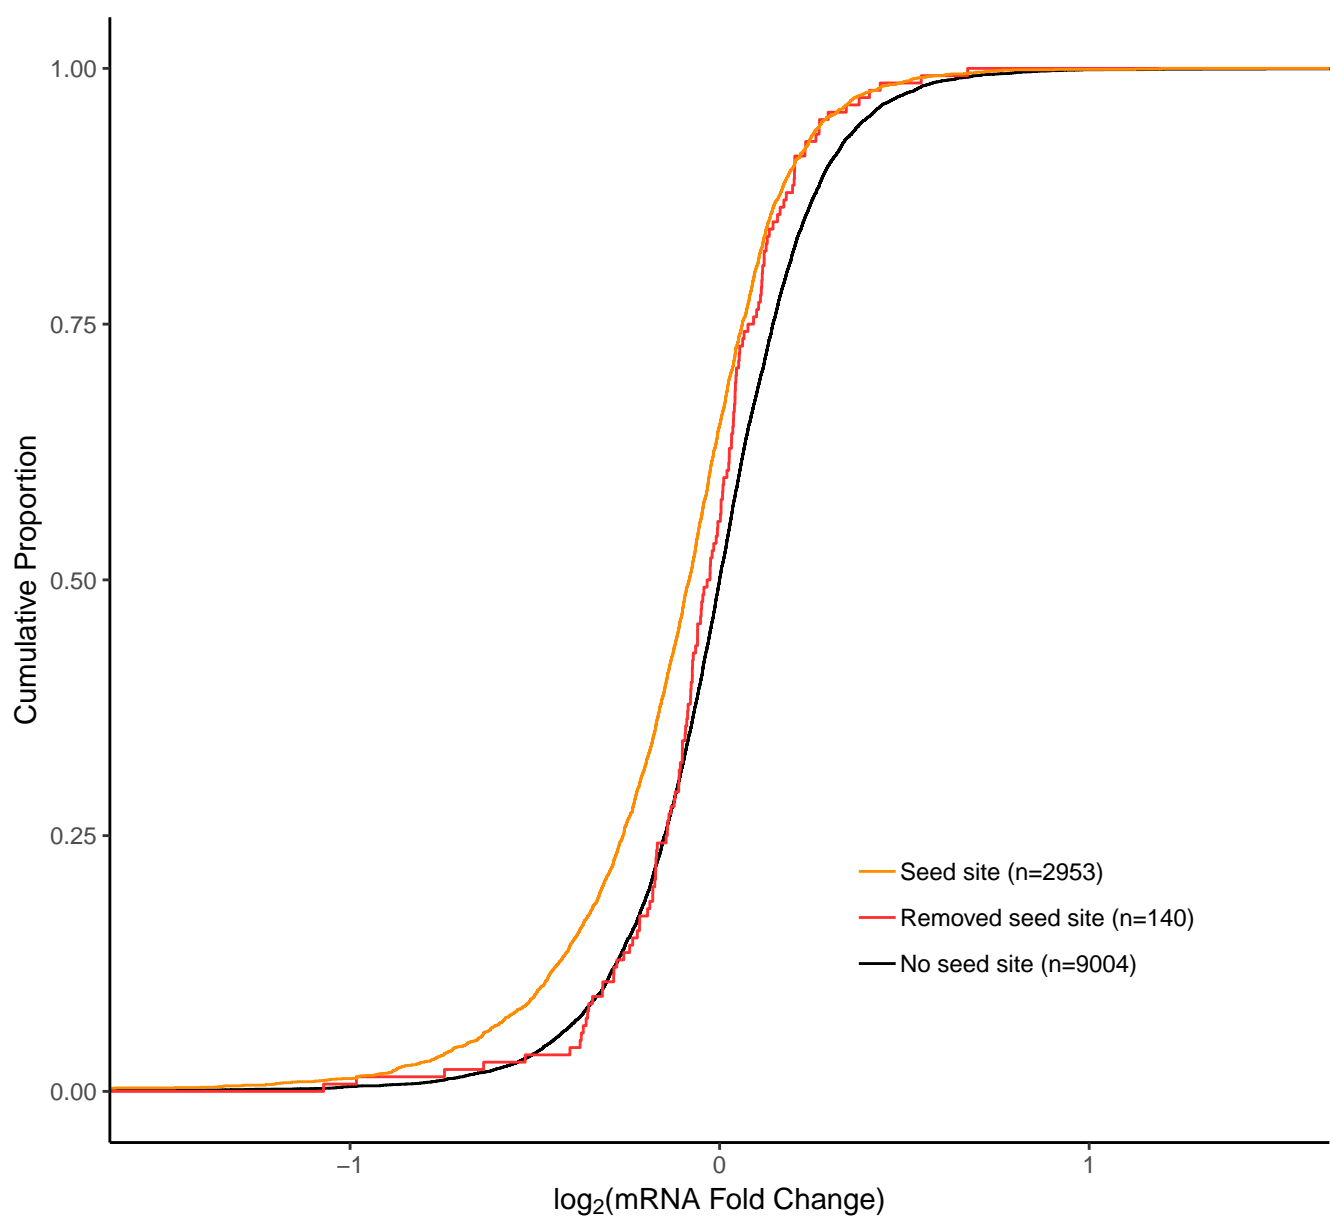

# miR-155-5p transfection (HeLa)

$p \approx 9.96e-05$

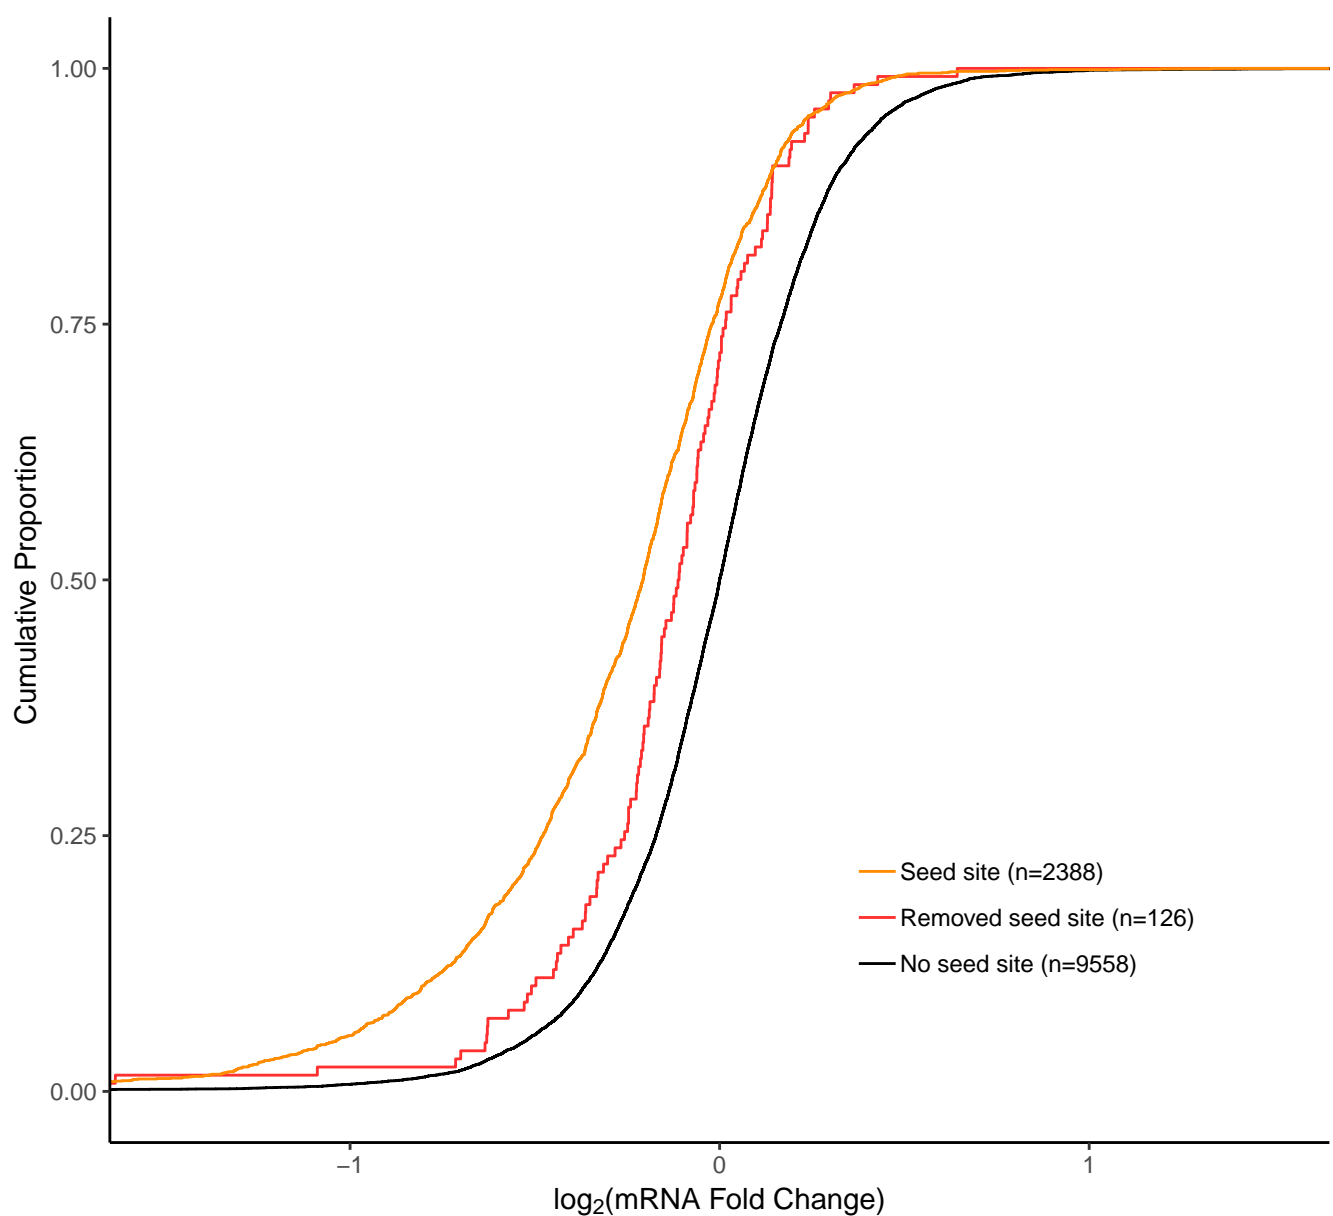

# miR-15a-5p transfection (HeLa)

$p \approx 6.7e-07$

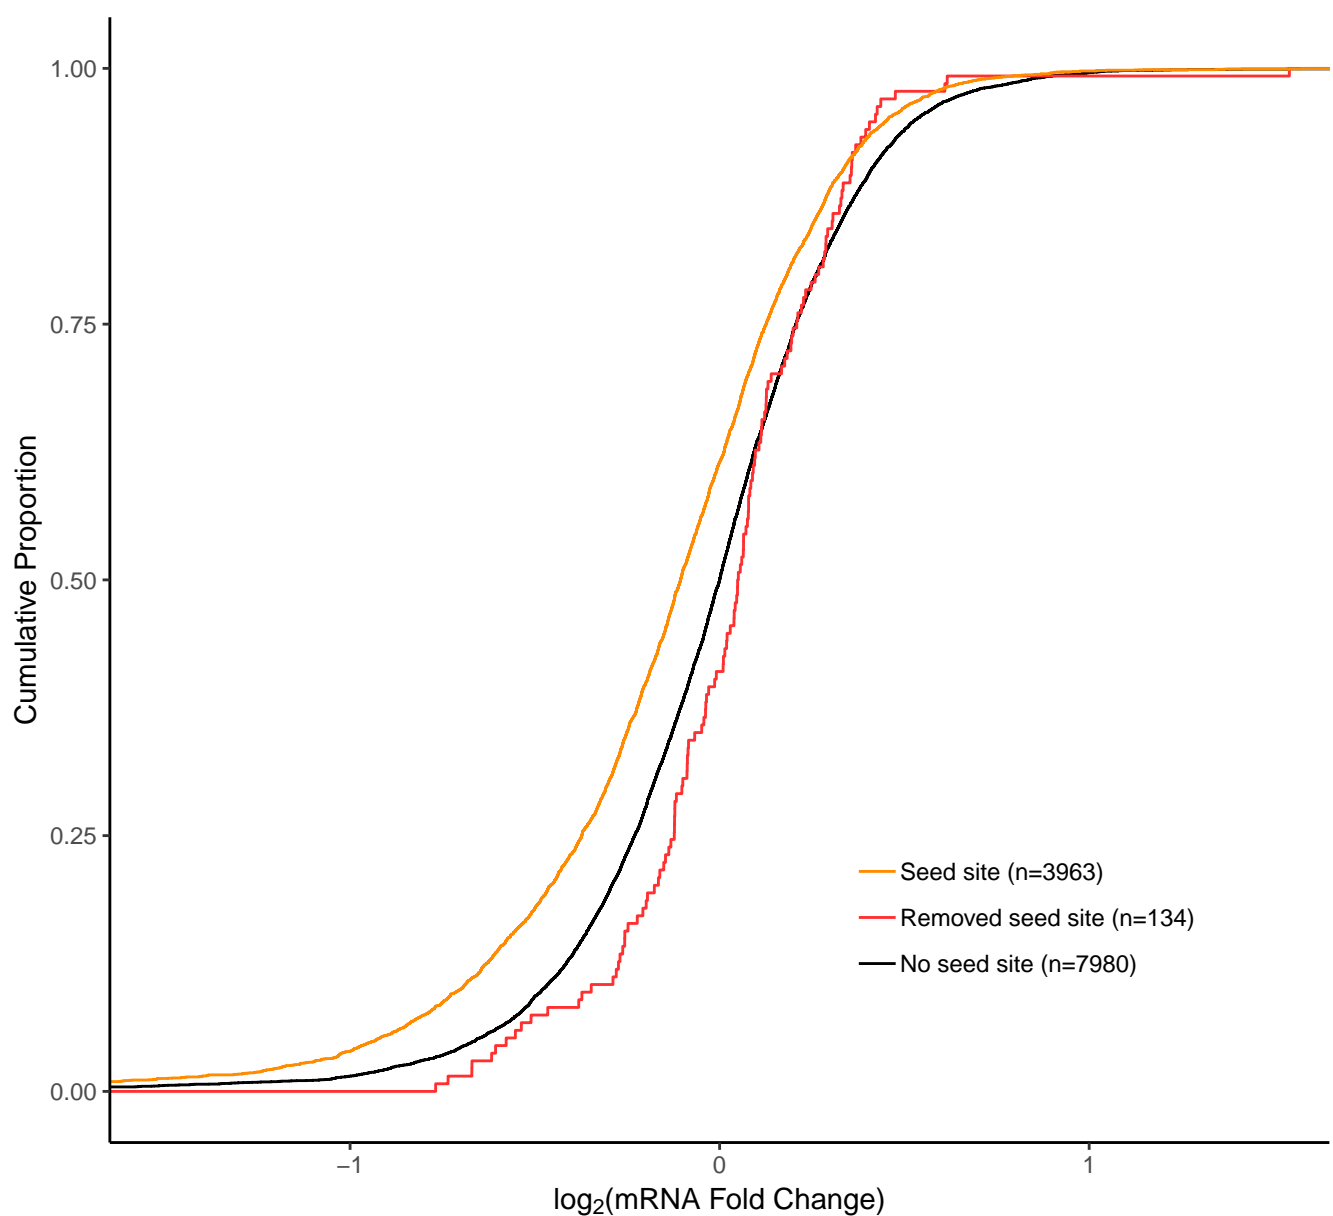



# miR-17-5p transfection (HeLa)

$p \approx 1.46e-07$

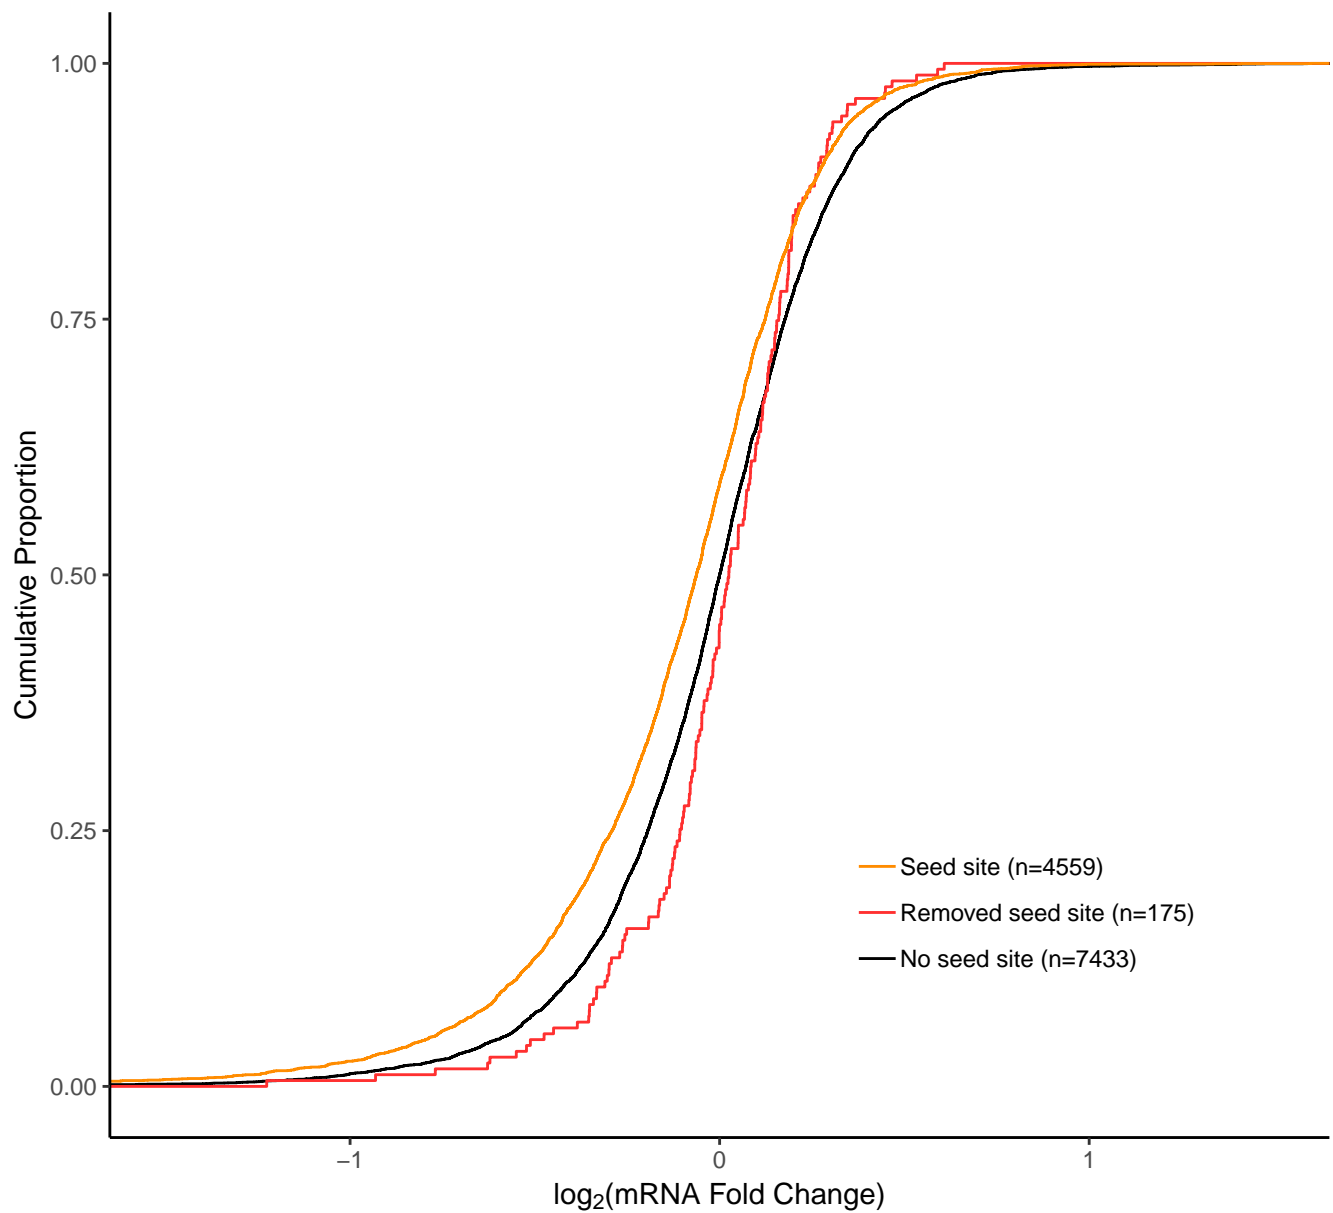

# miR-193b-3p transfection (HeLa)

$\rho \approx 1.71e-12$

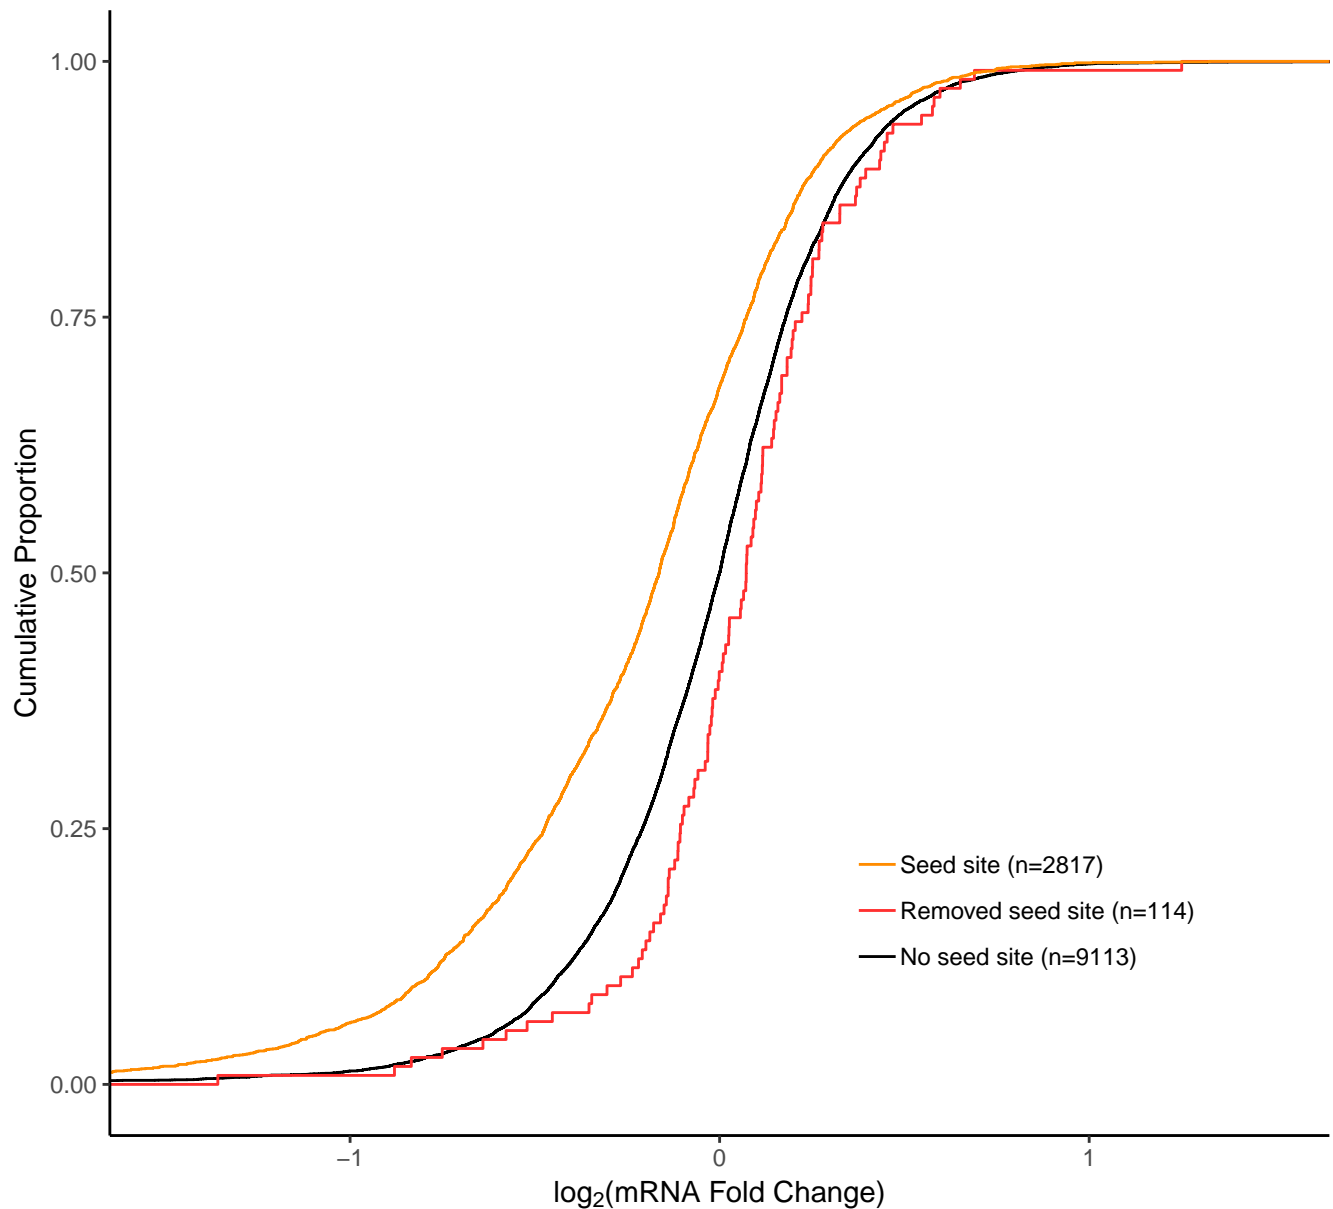

# miR-200a-3p transfection (HeLa)

$p \approx 3.22e-05$

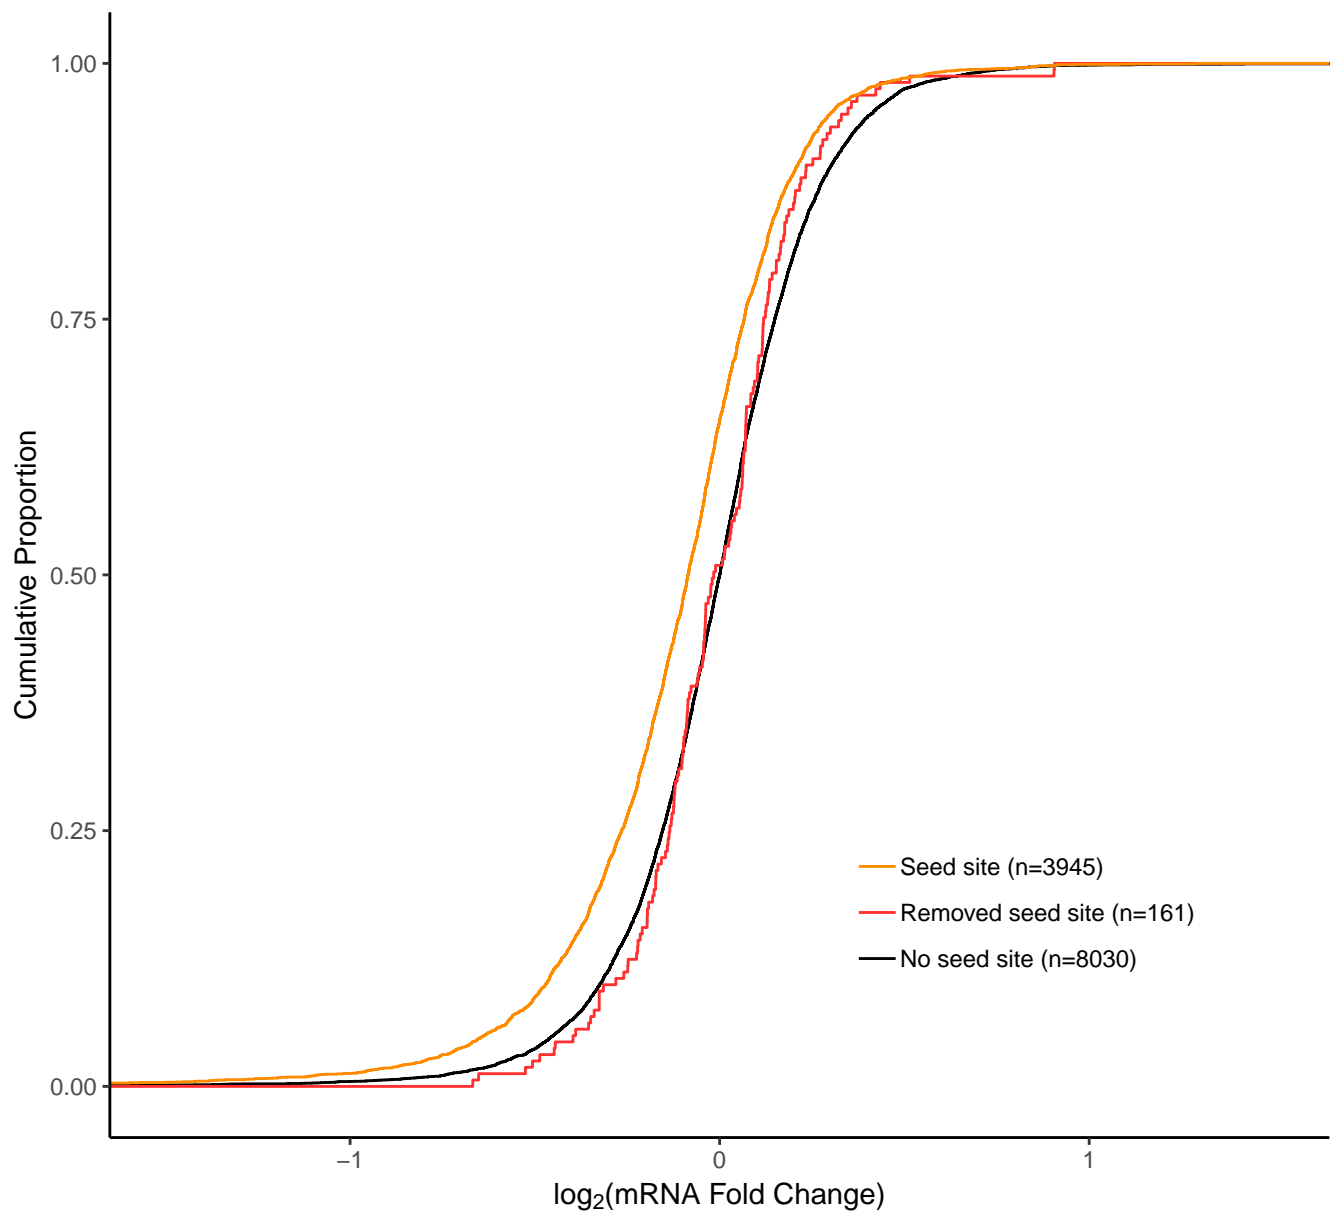

# miR-200b-3p transfection (HeLa)

$p \approx 2.98e-05$

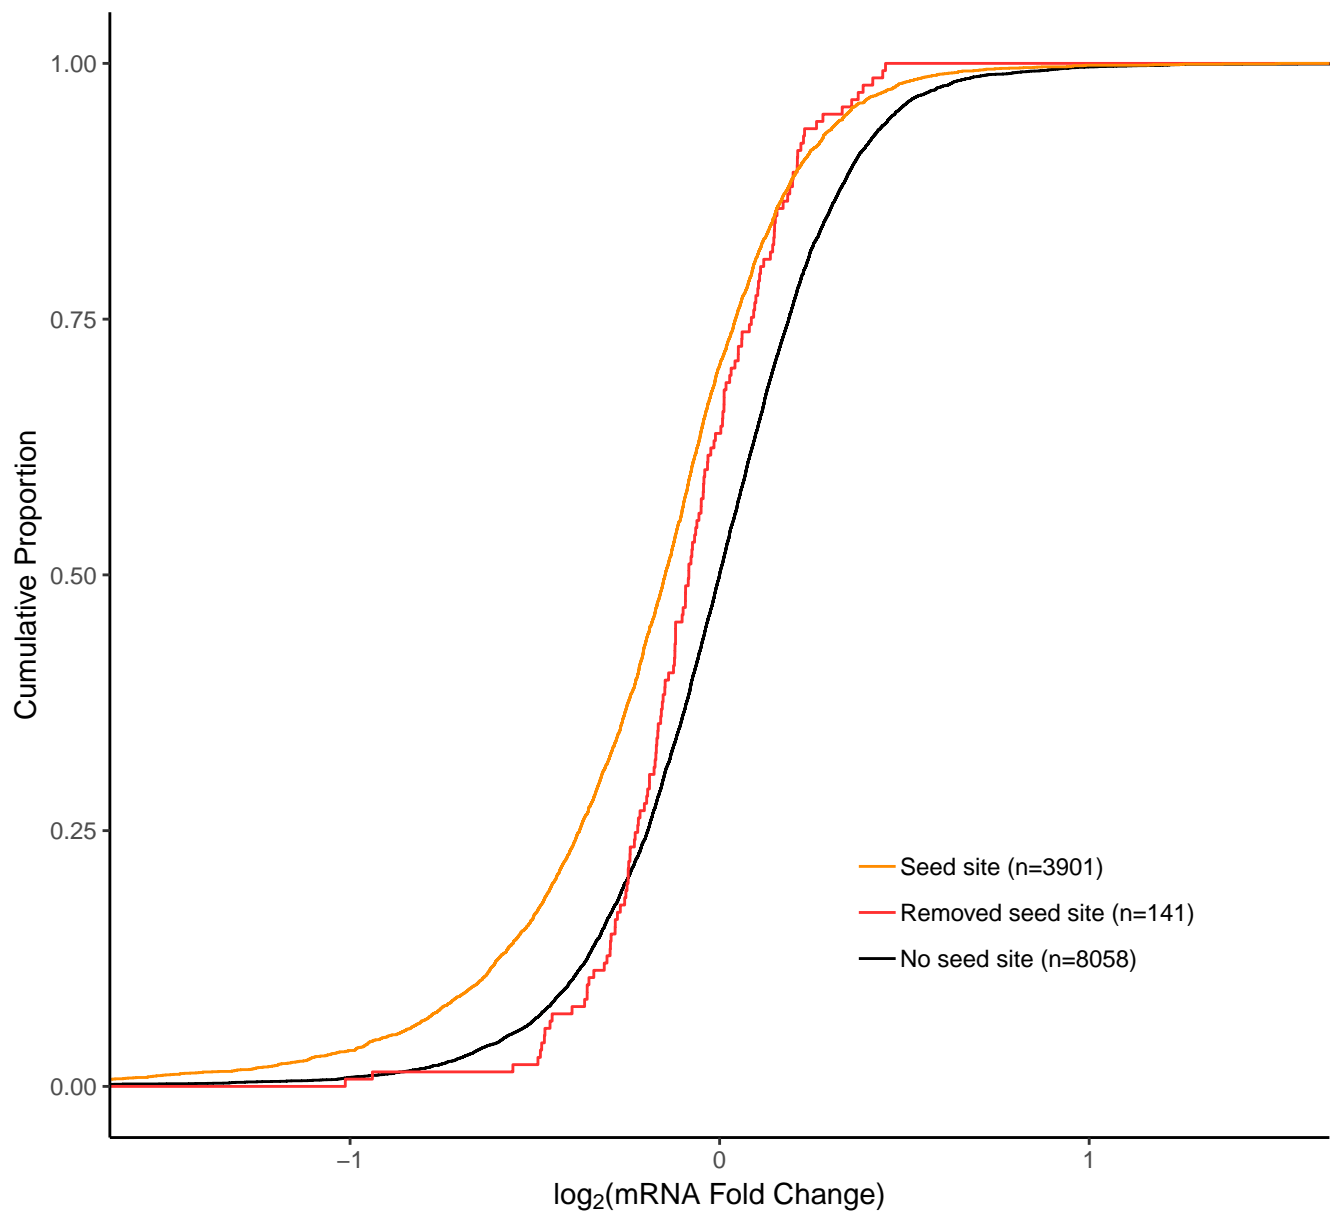

# miR-200c-3p transfection (HeLa)

$p \approx 2.26e-05$

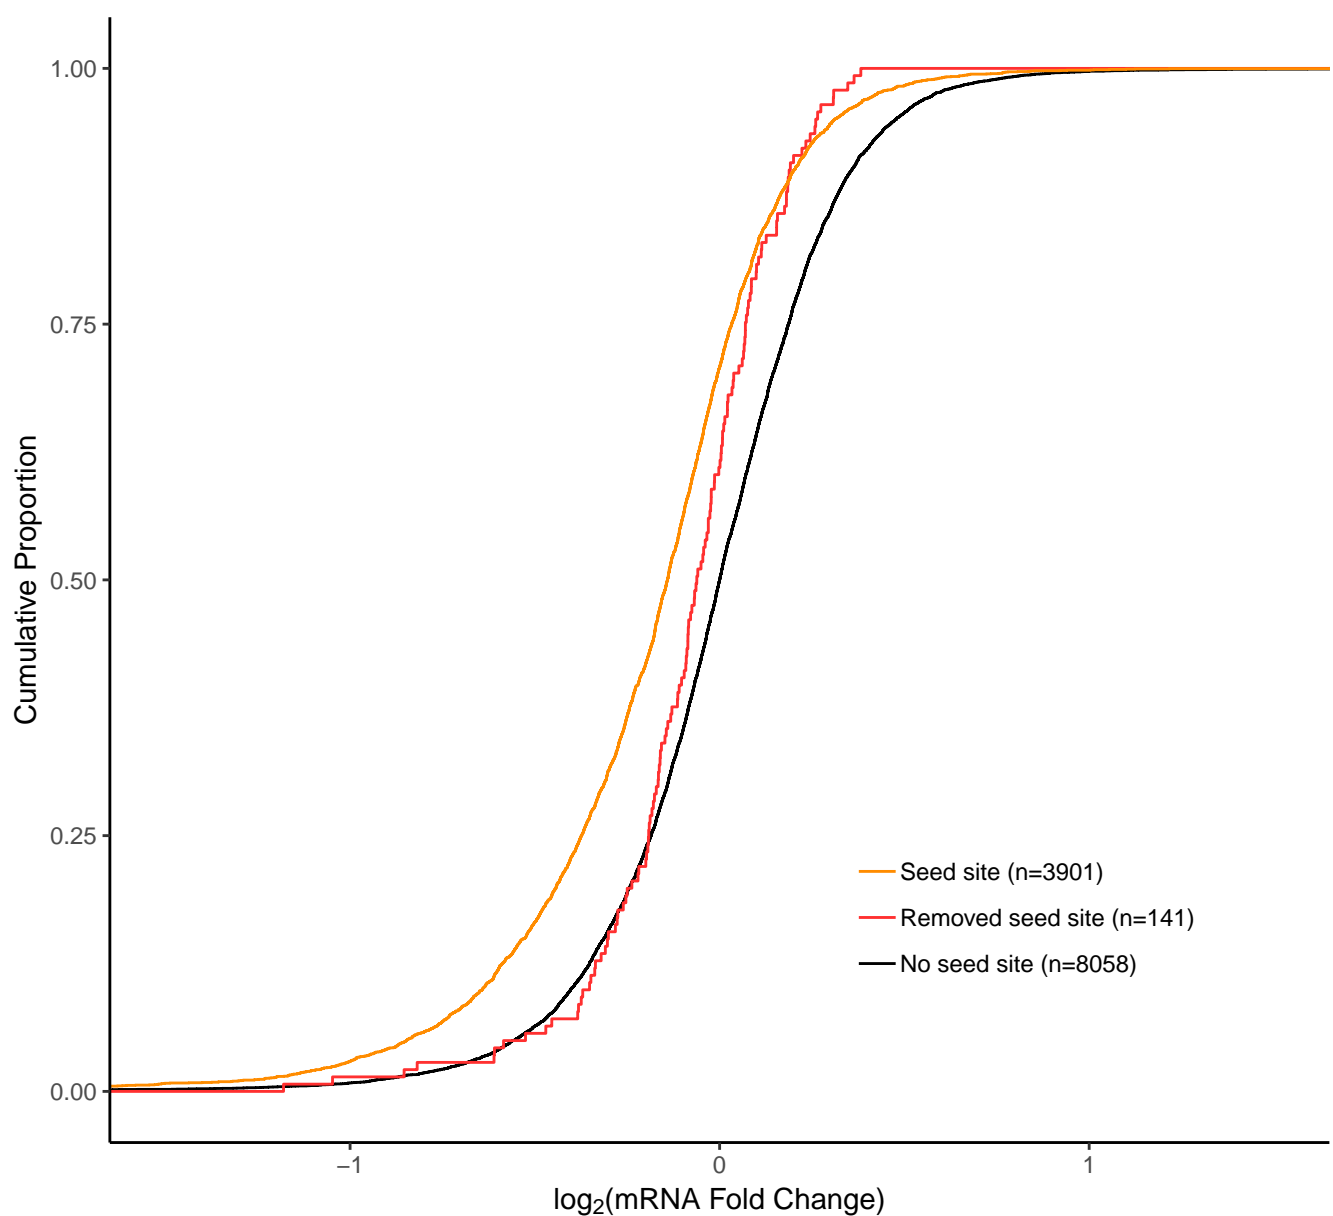

# miR-206 transfection (HeLa)

$p \approx 1.23e-06$

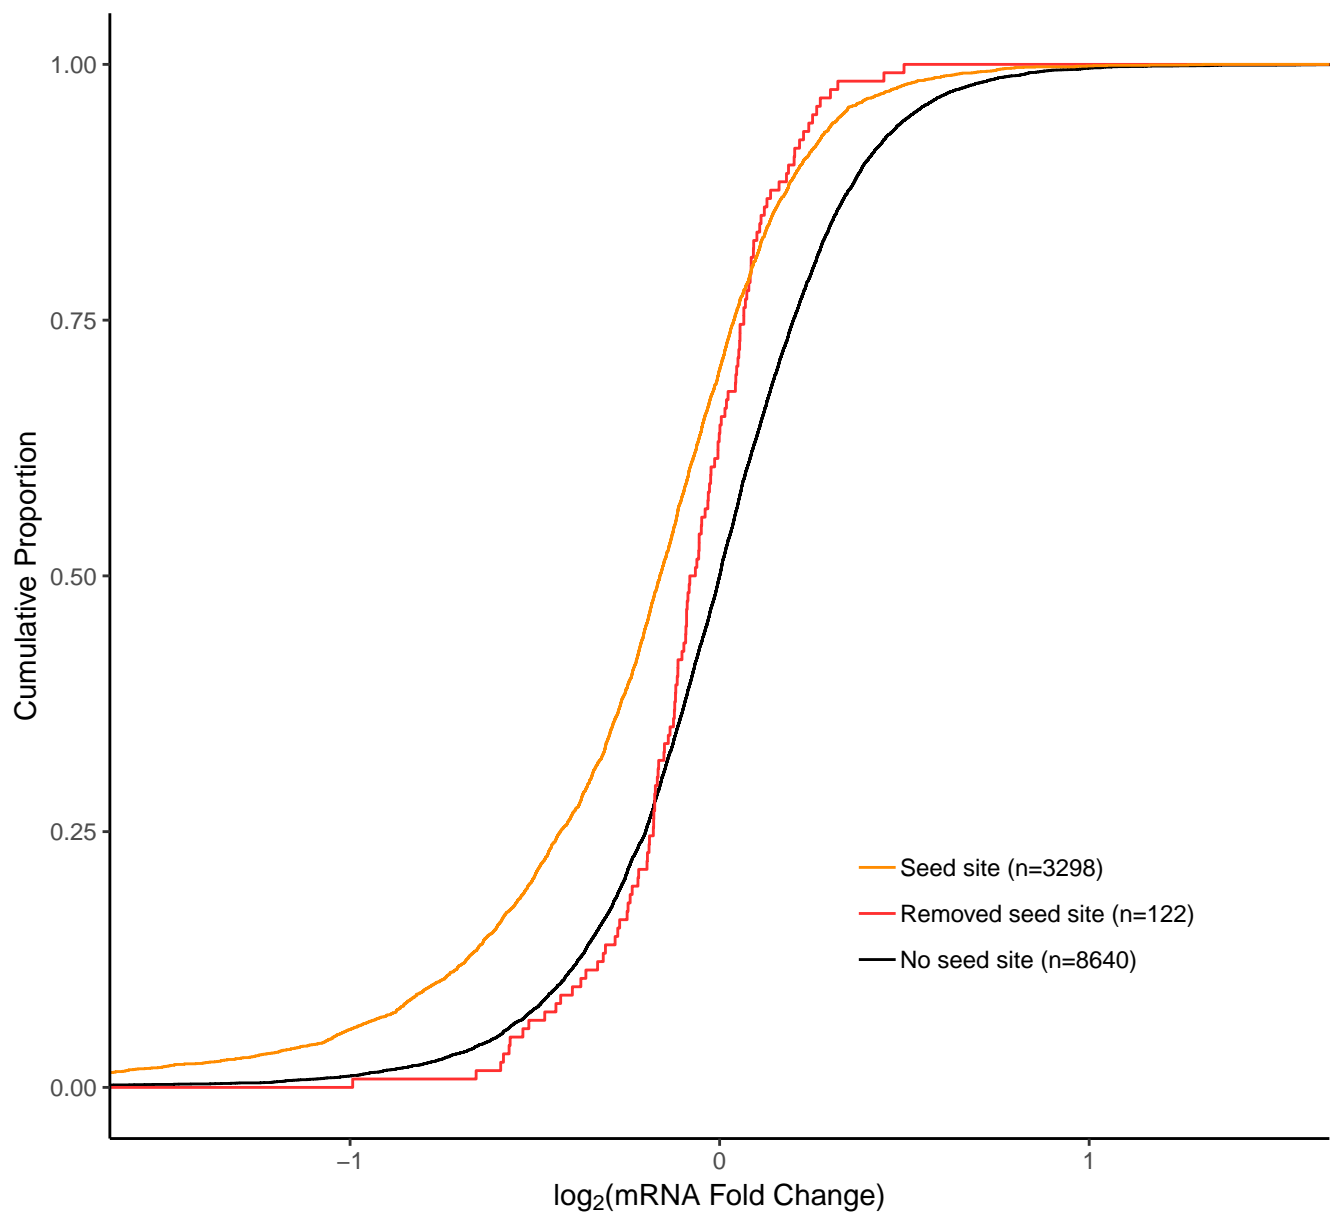

# miR-210-3p transfection (HeLa)

$p \approx 0.0648$

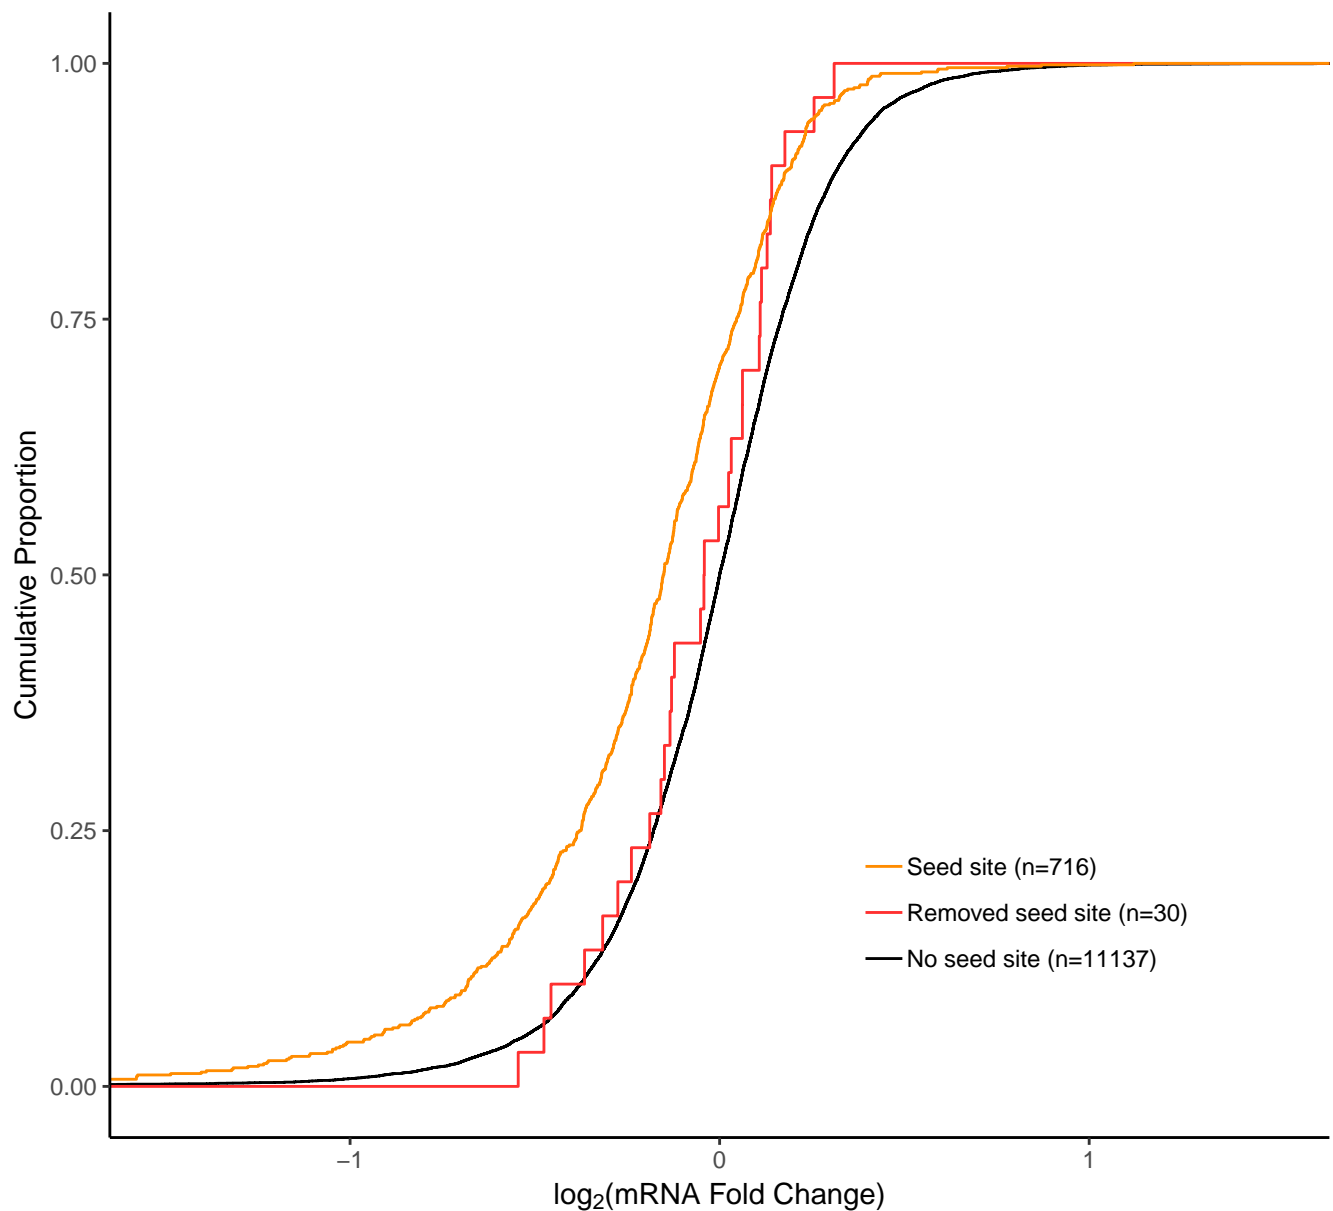

# miR-21-5p transfection (HeLa)

$p \approx 0.00646$

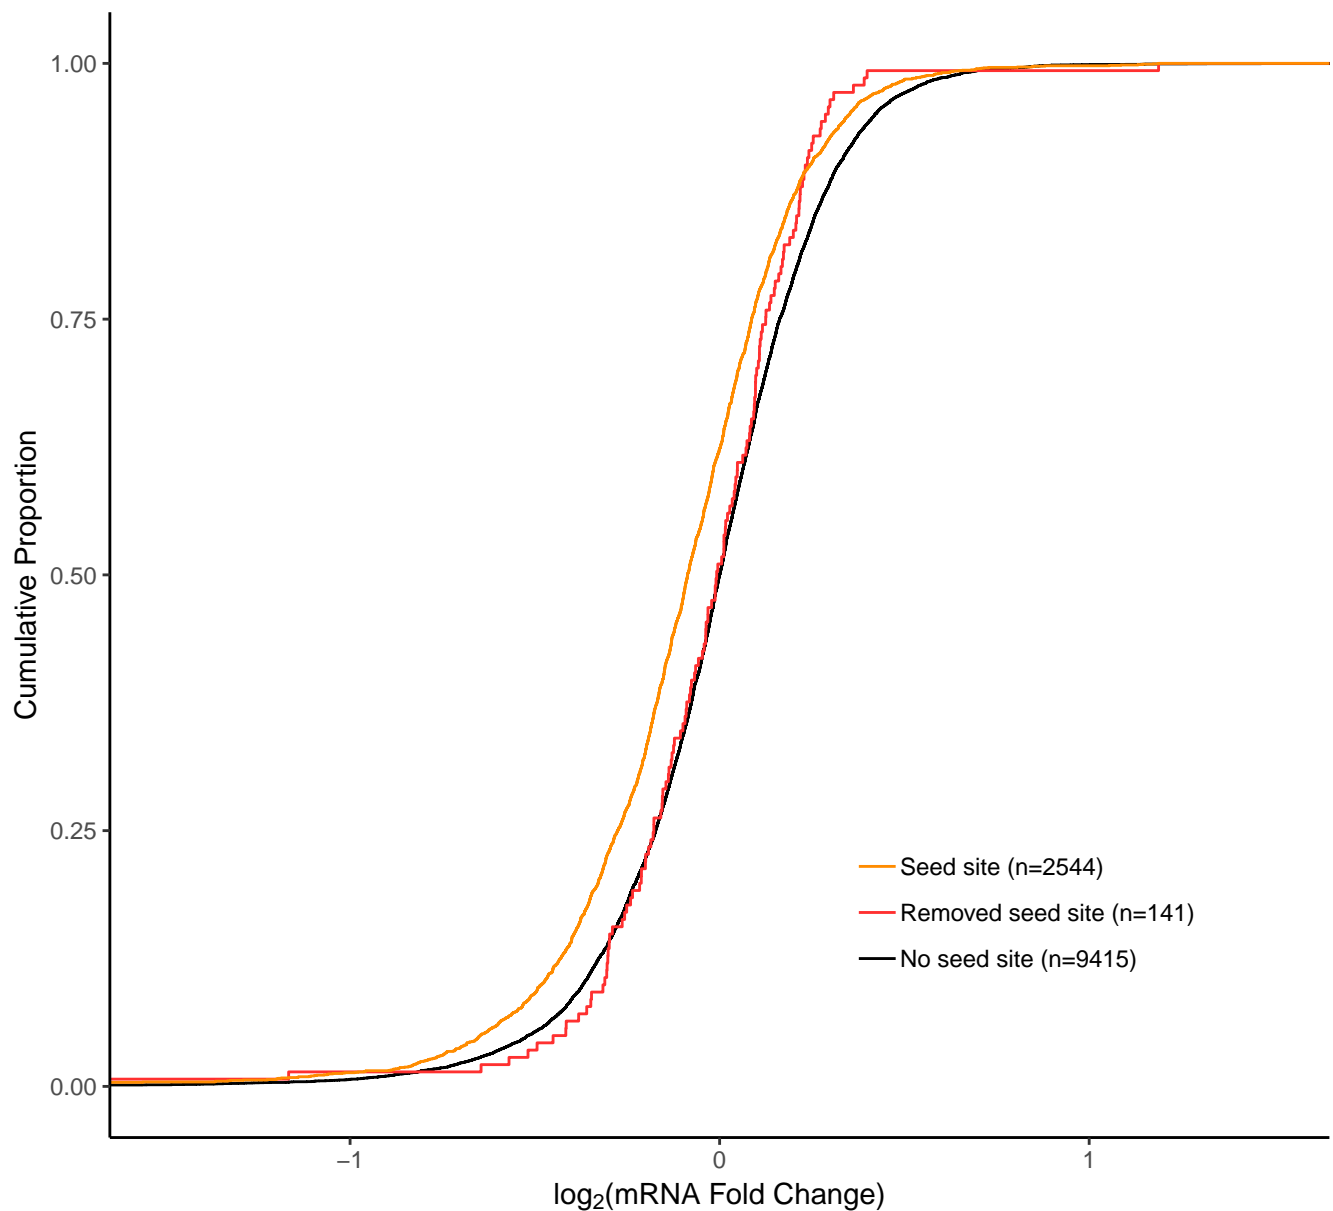



# miR-31-5p transfection (HeLa)

$p \approx 8.27e-05$

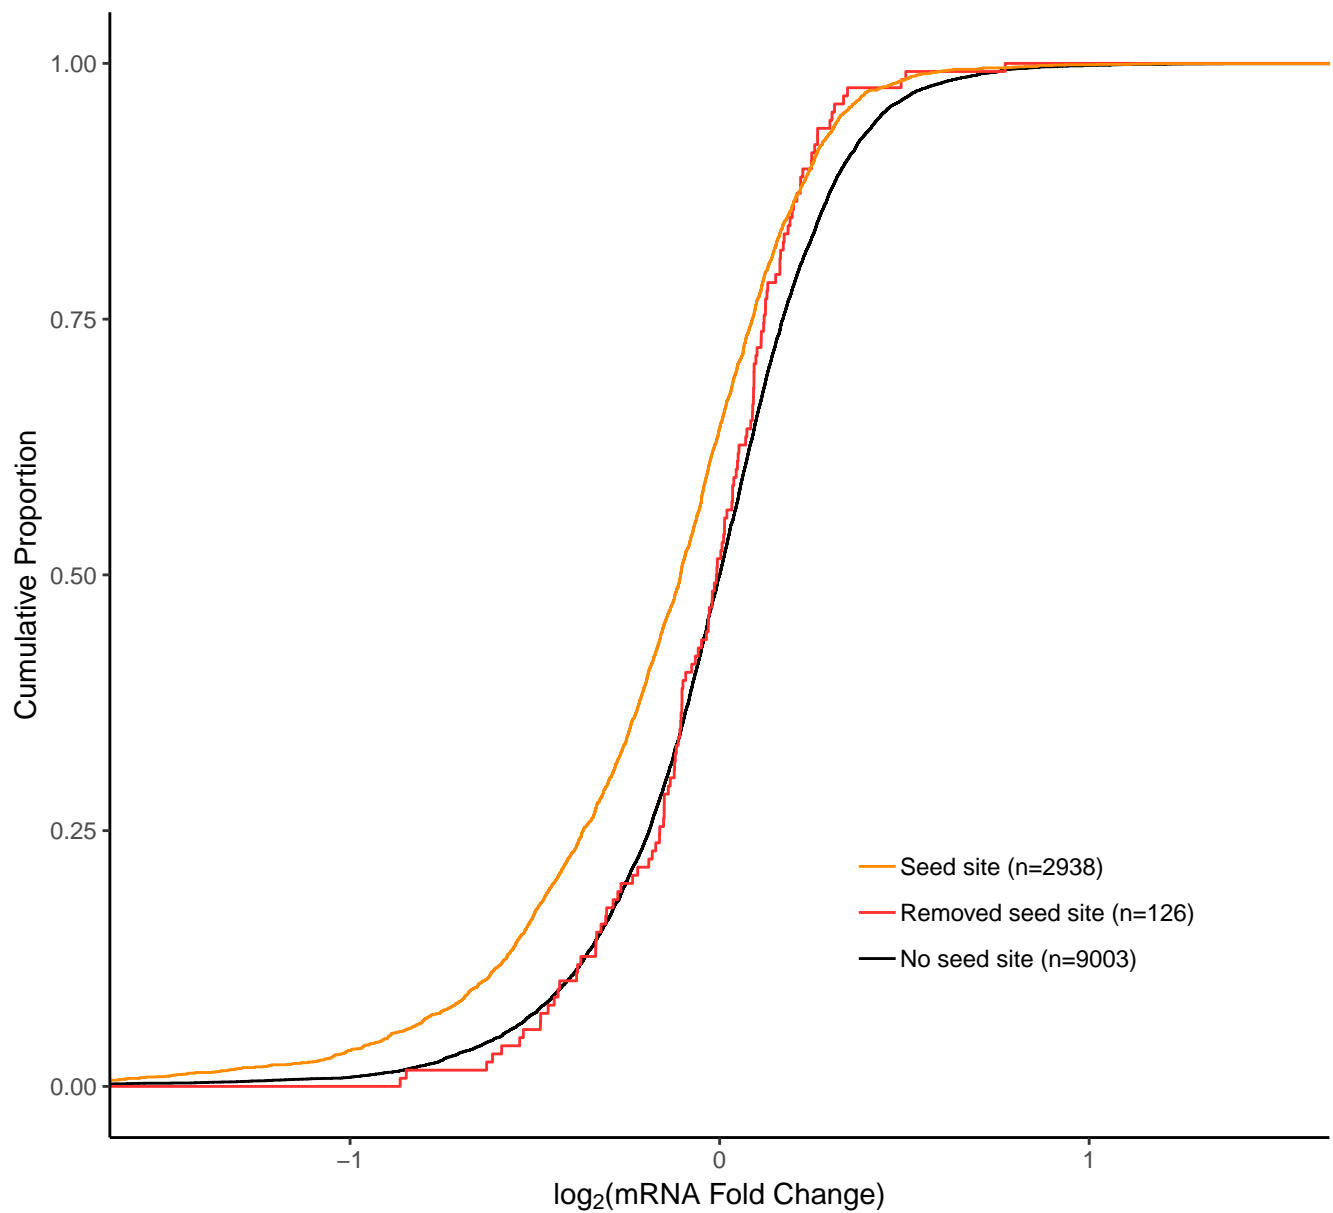

# miR-34a-5p transfection (HeLa)

$p \approx 2.87e-05$

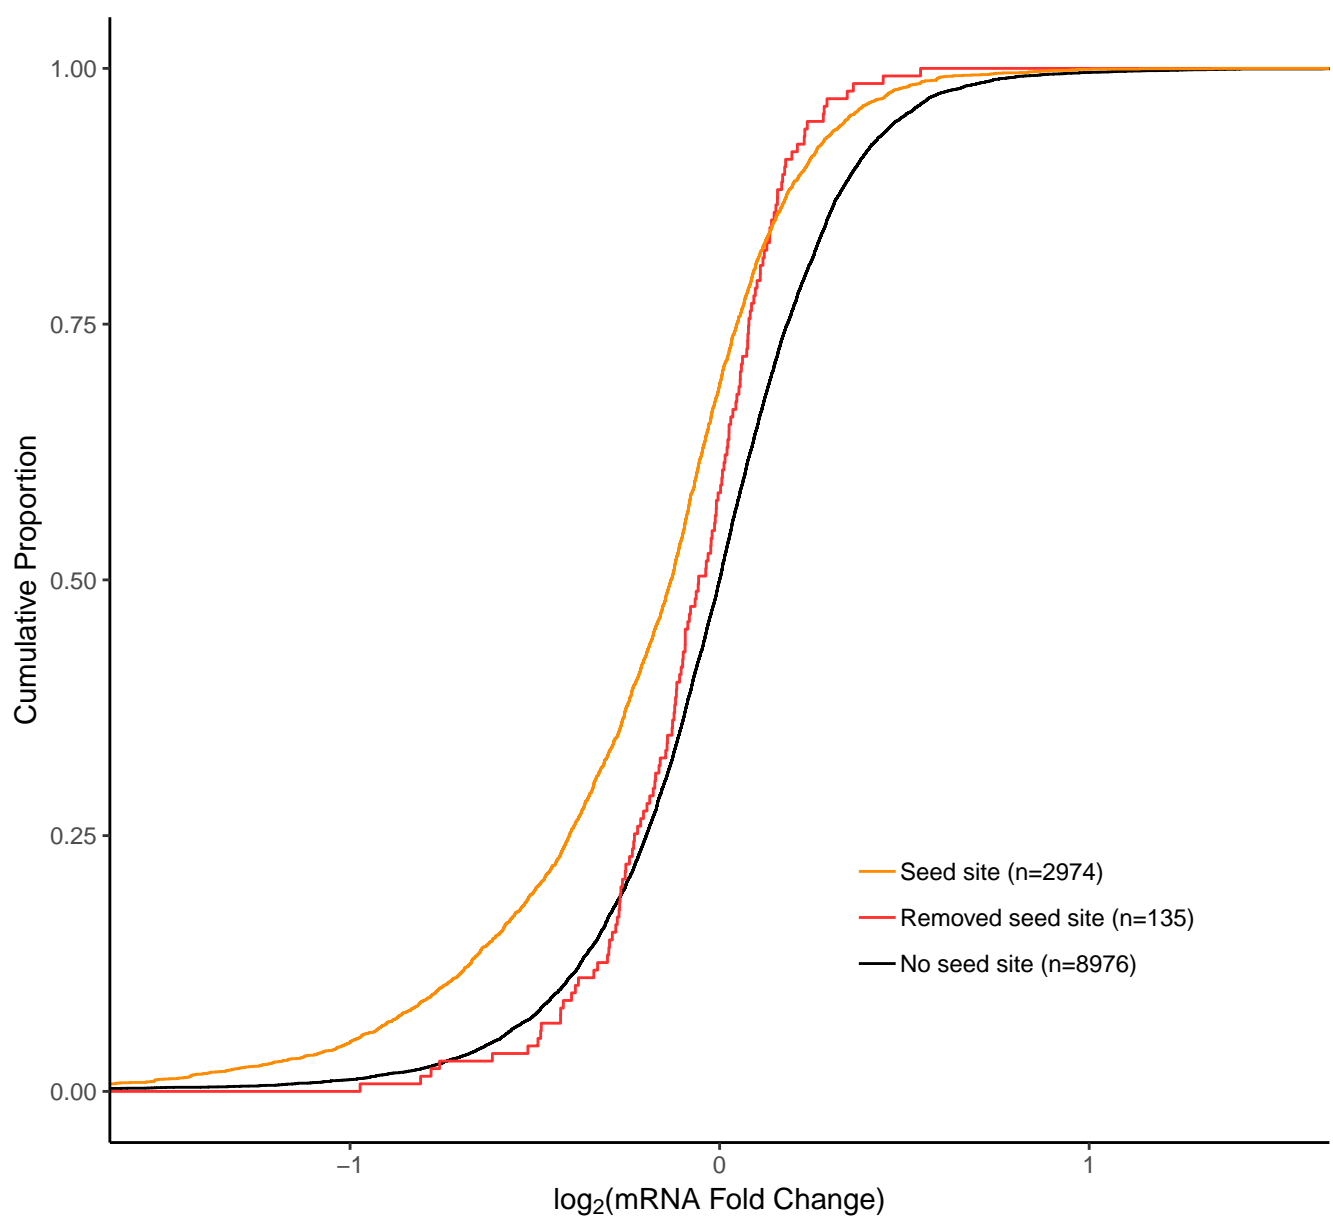

# miR-9-3p transfection (HeLa)

$p \approx 1.2e-07$

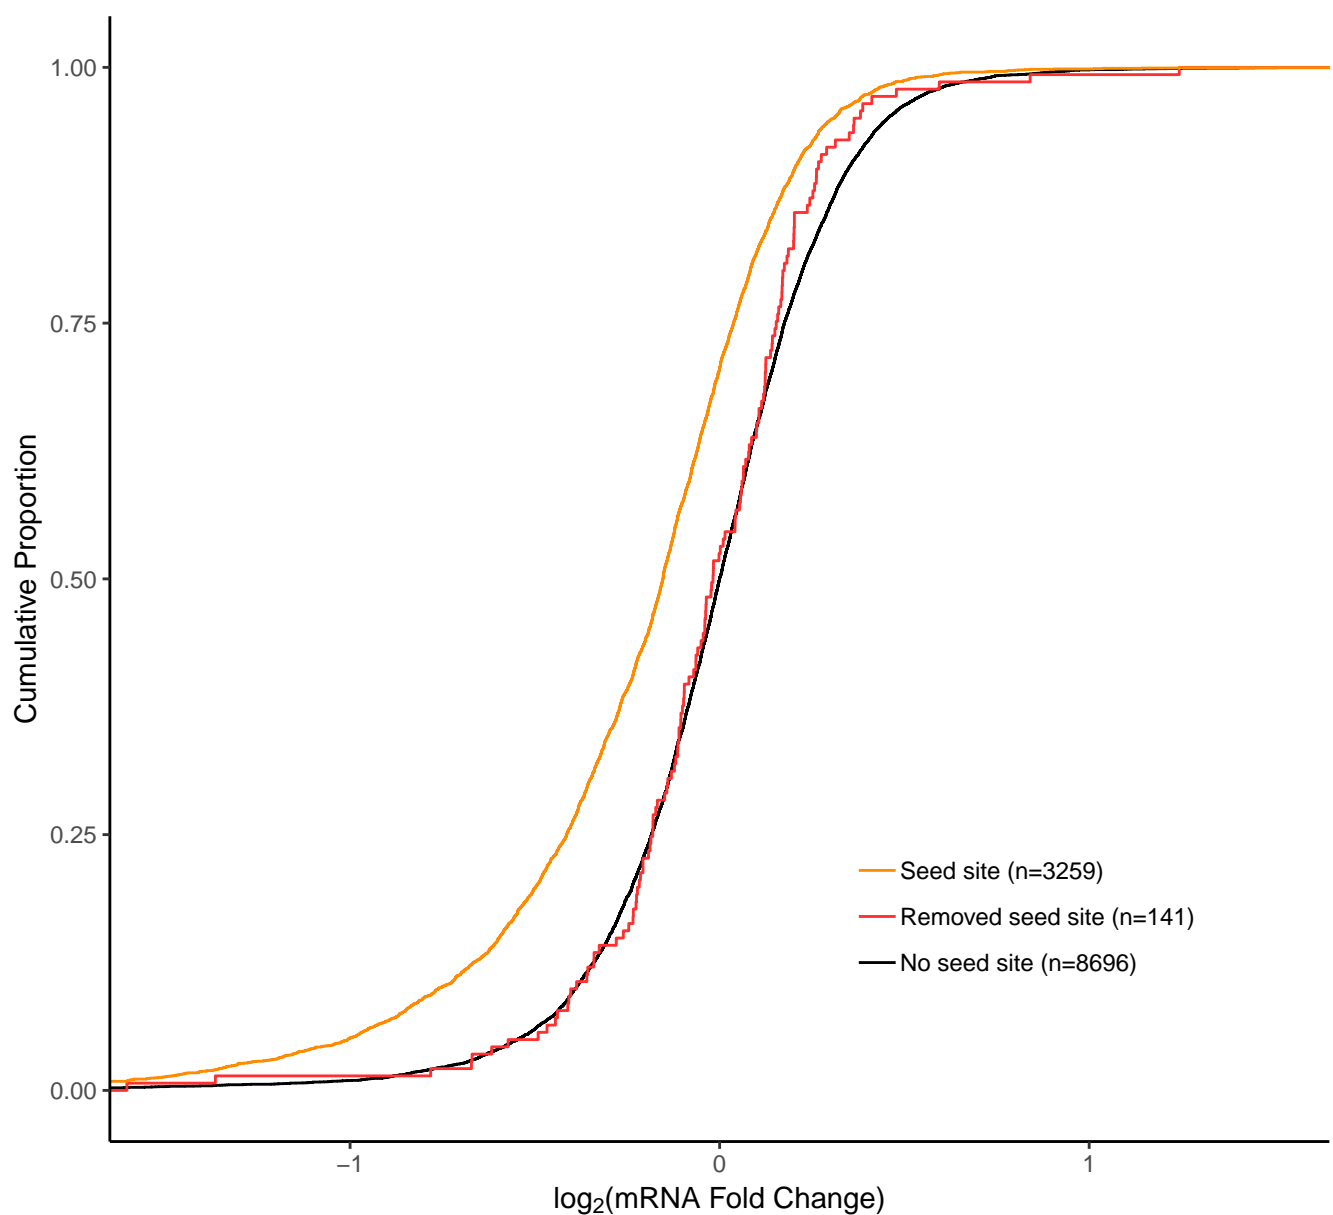

# miR-9-5p transfection (HeLa)

$p \approx 5.15e-05$

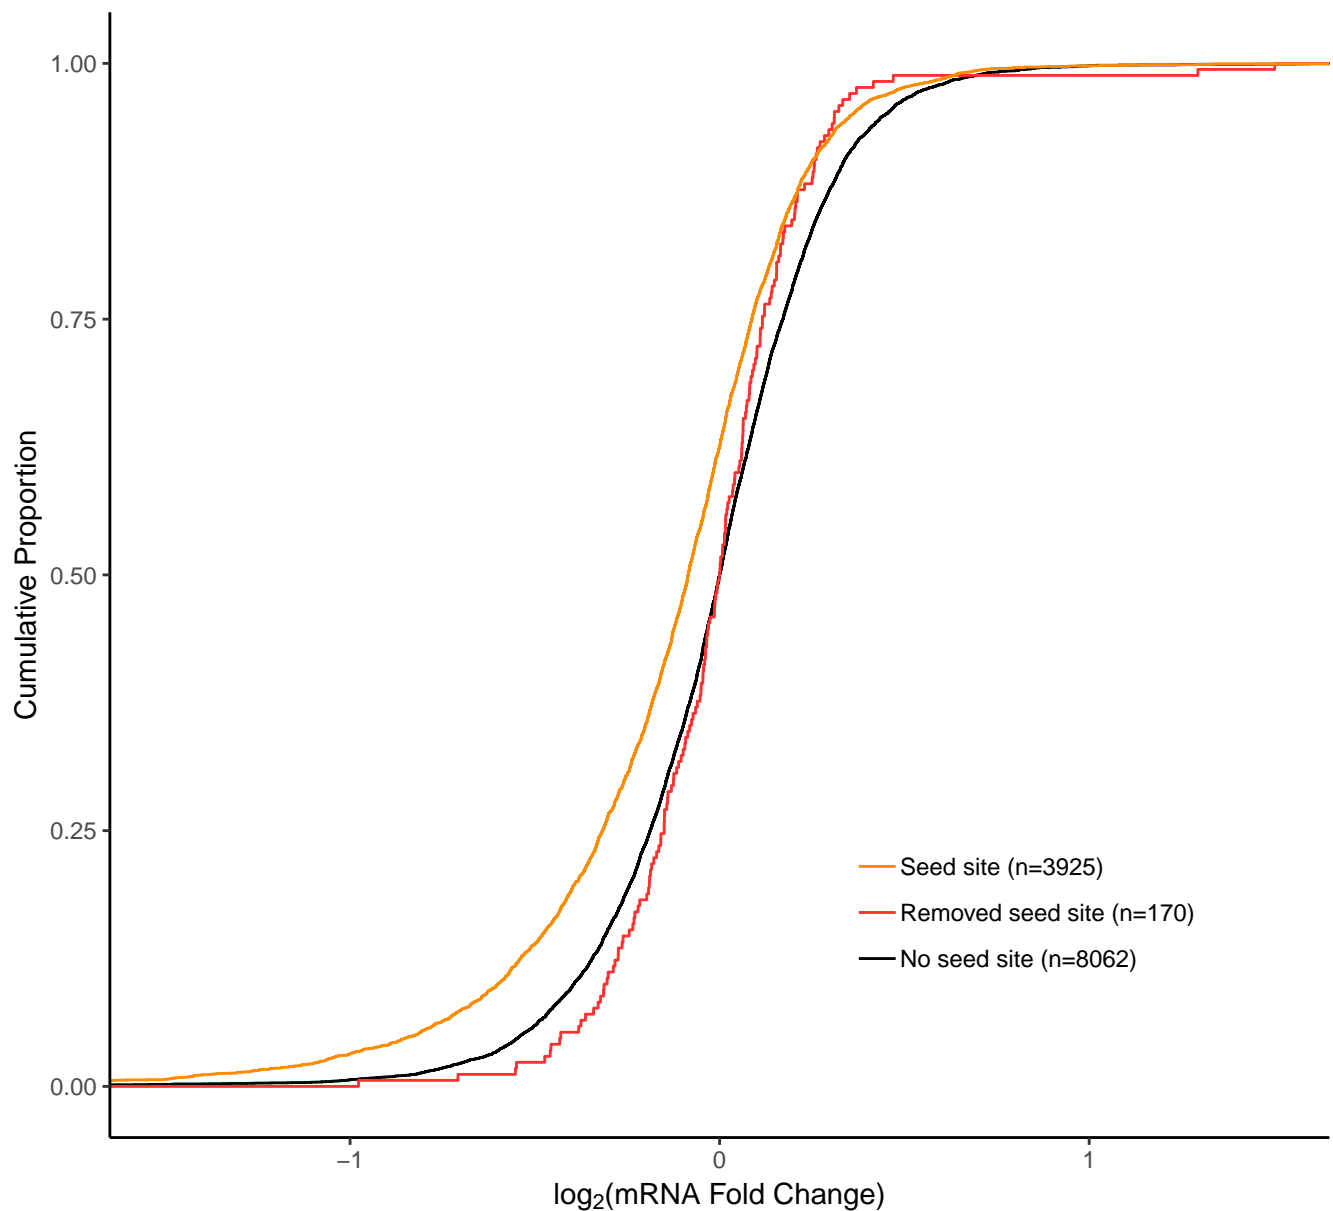

Supplement: Supplementary file [file media-6.pdf]
