# Supplementary material for: FilTar: Using RNA-Seq data to improve microRNA target prediction accuracy in animals
Source: bioRxiv or medRxiv preprint supplement (doi:10.1101/595322), 2019-04-01

# miR-503-5p transfection (HeLa3)

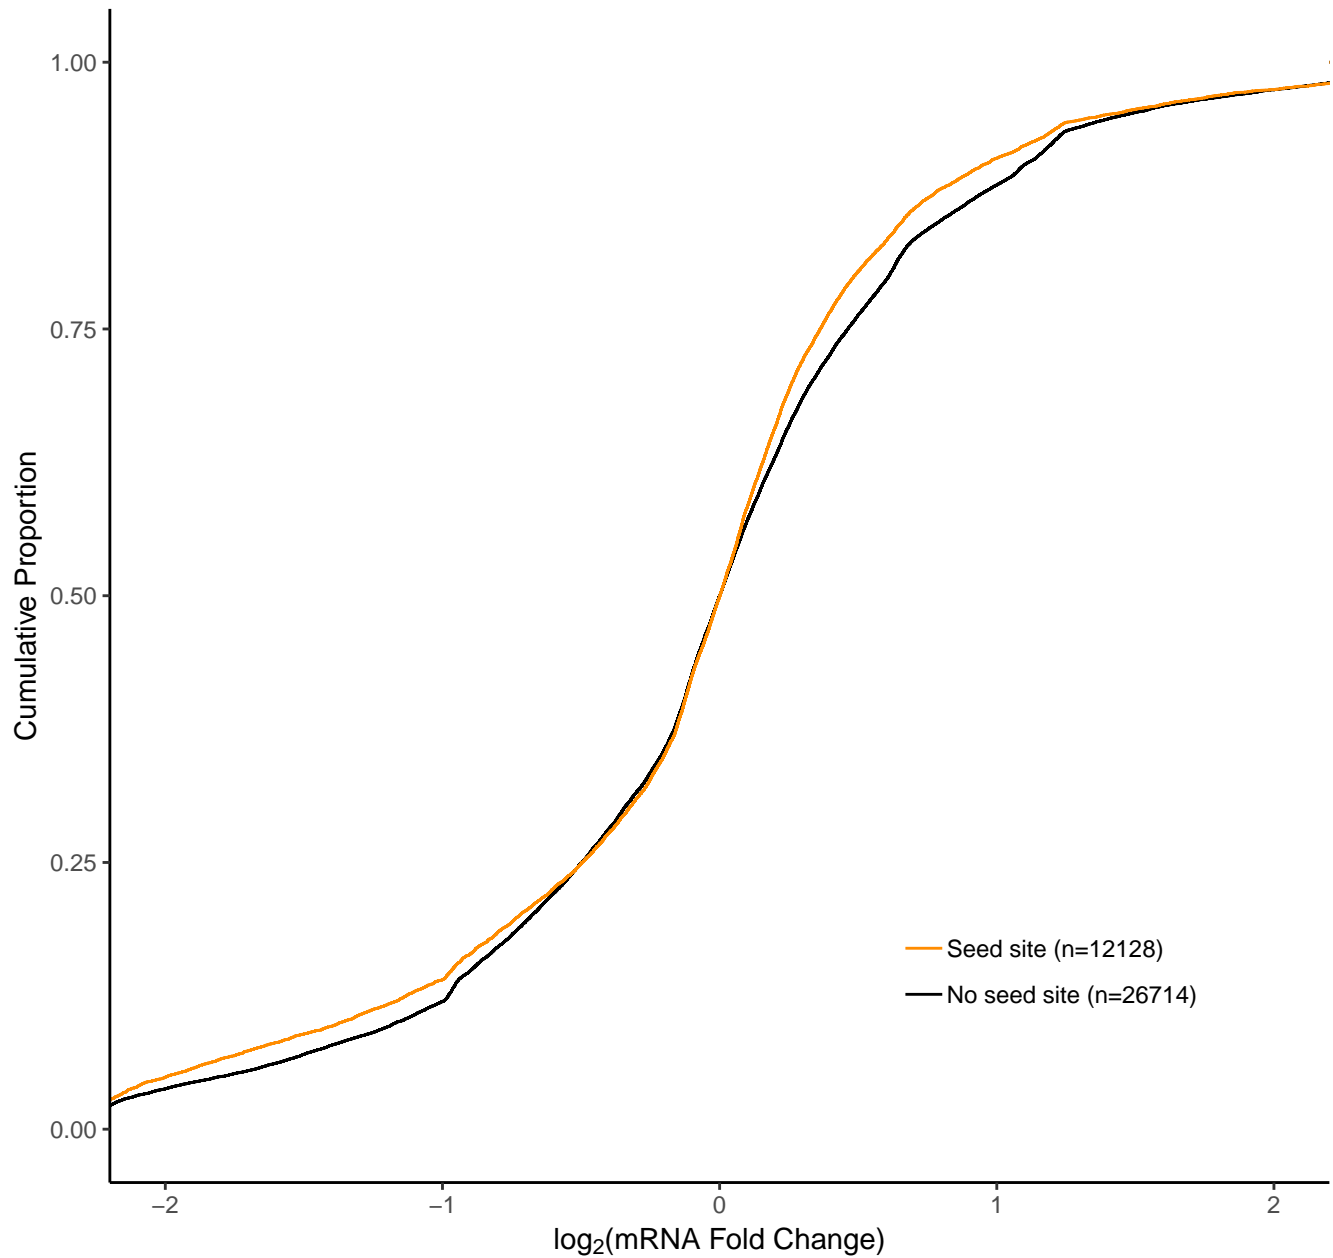

# miR-494-3p transfection (HeLa3)

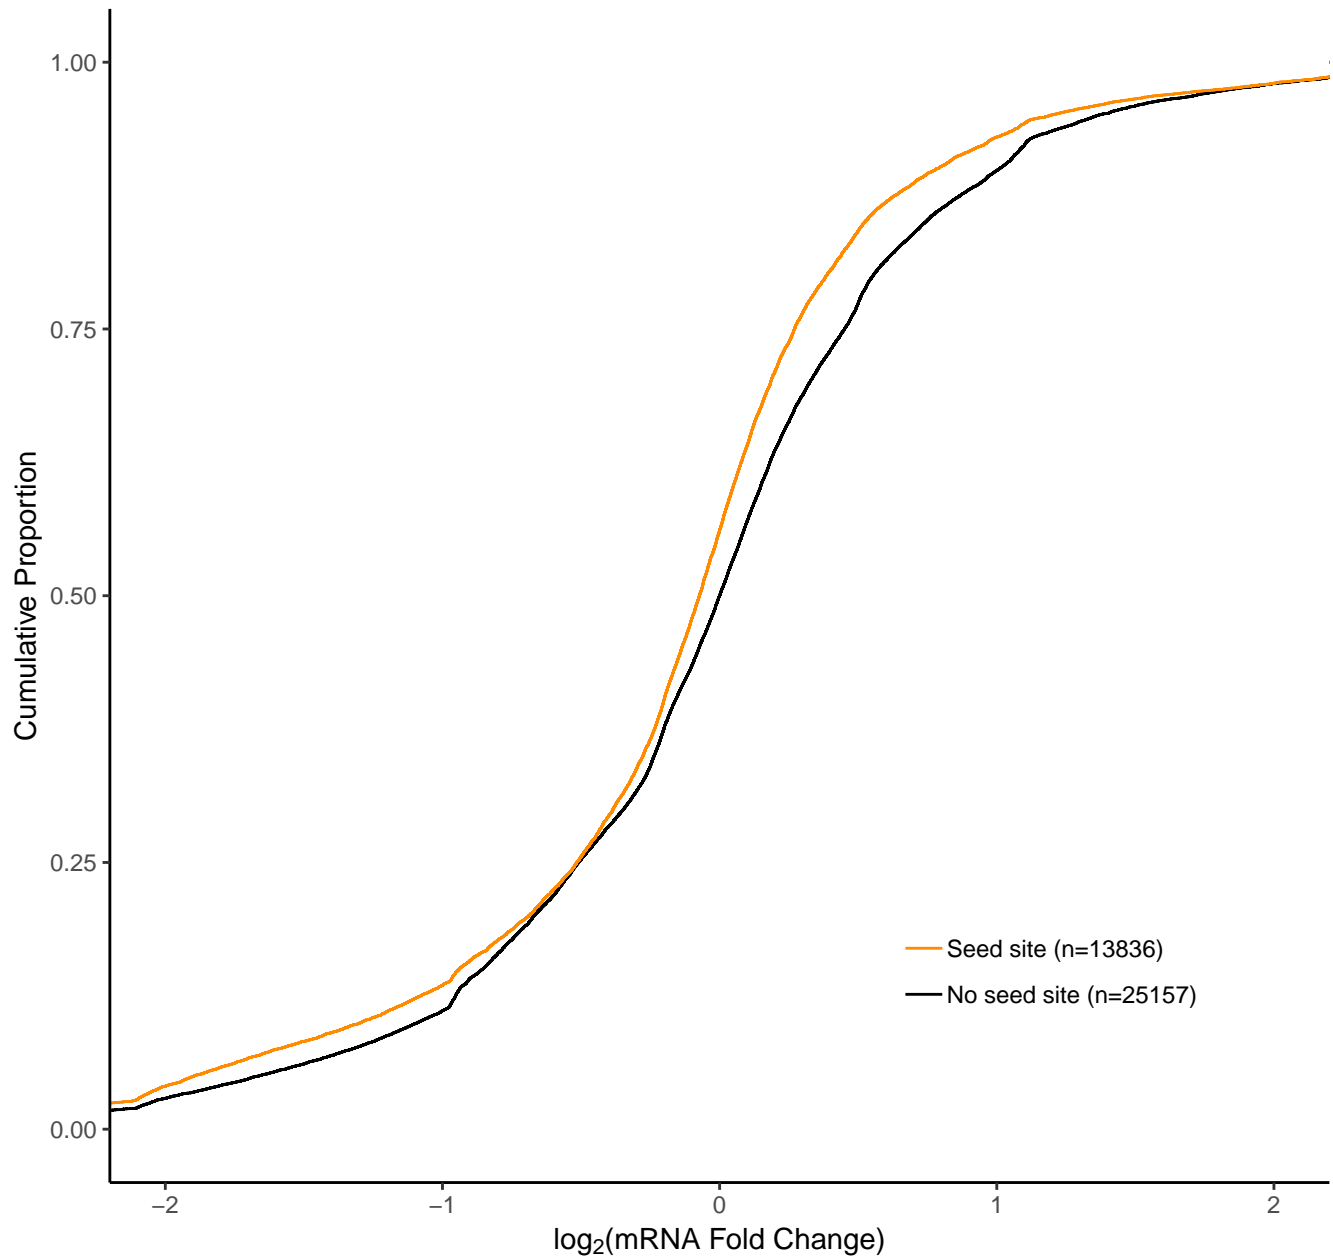

# miR-103a-3p transfection (HeLa3)

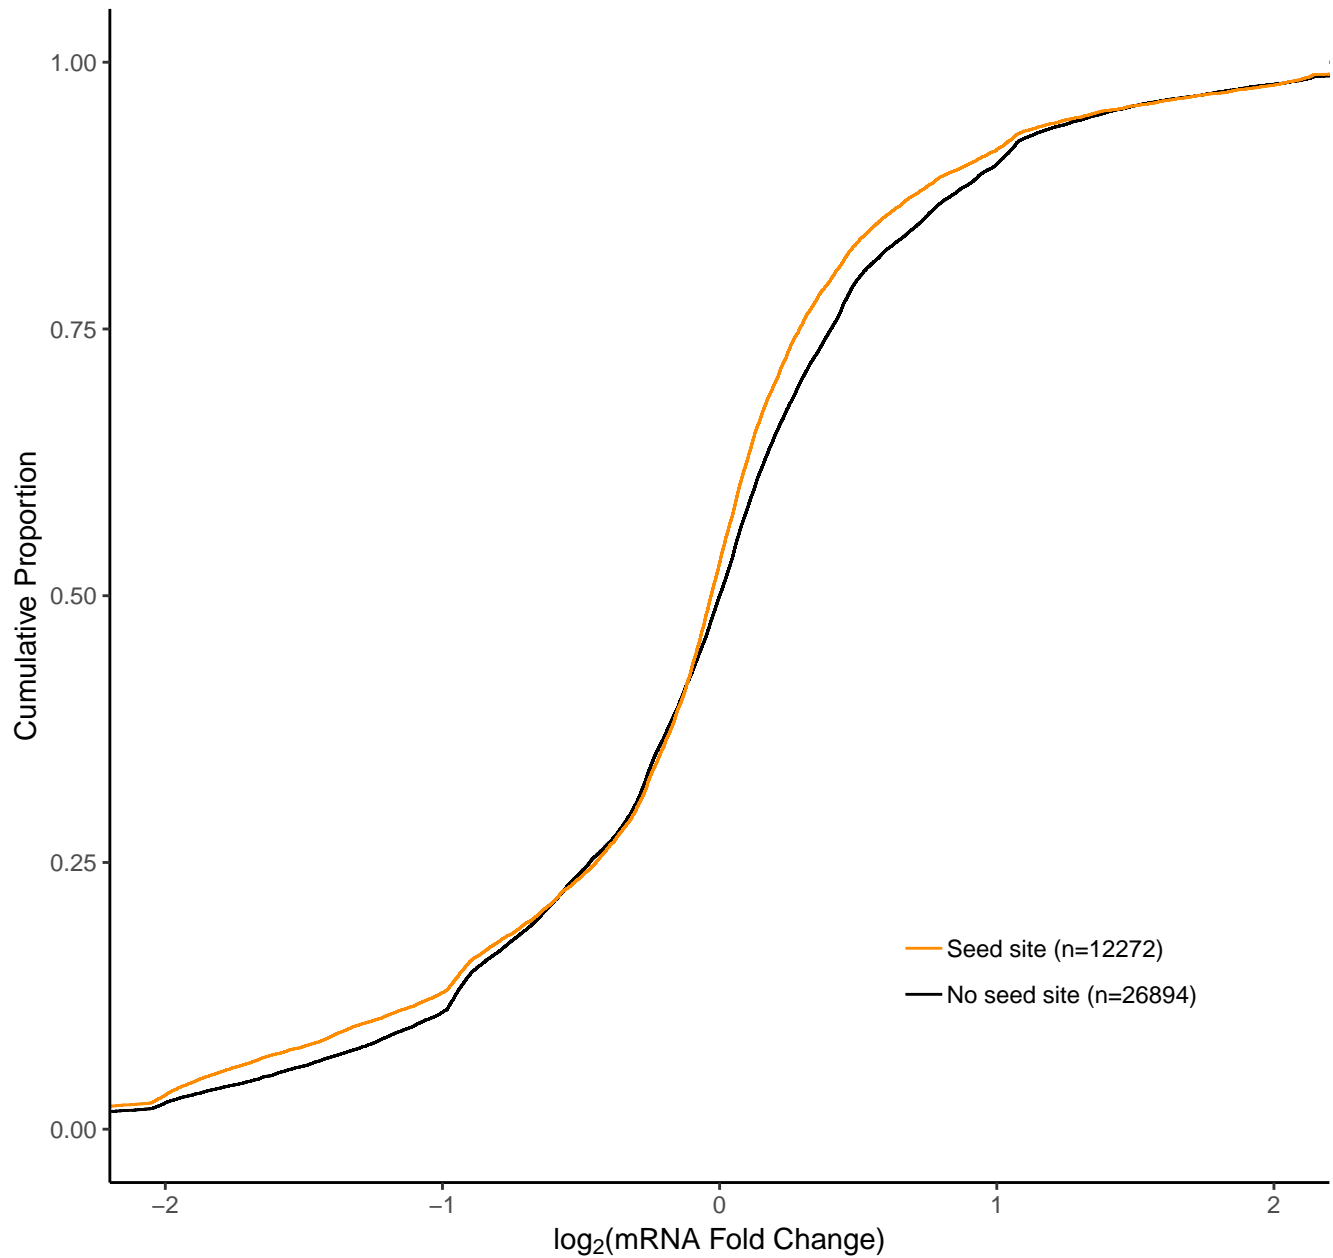

# miR-603 transfection (HeLa2)

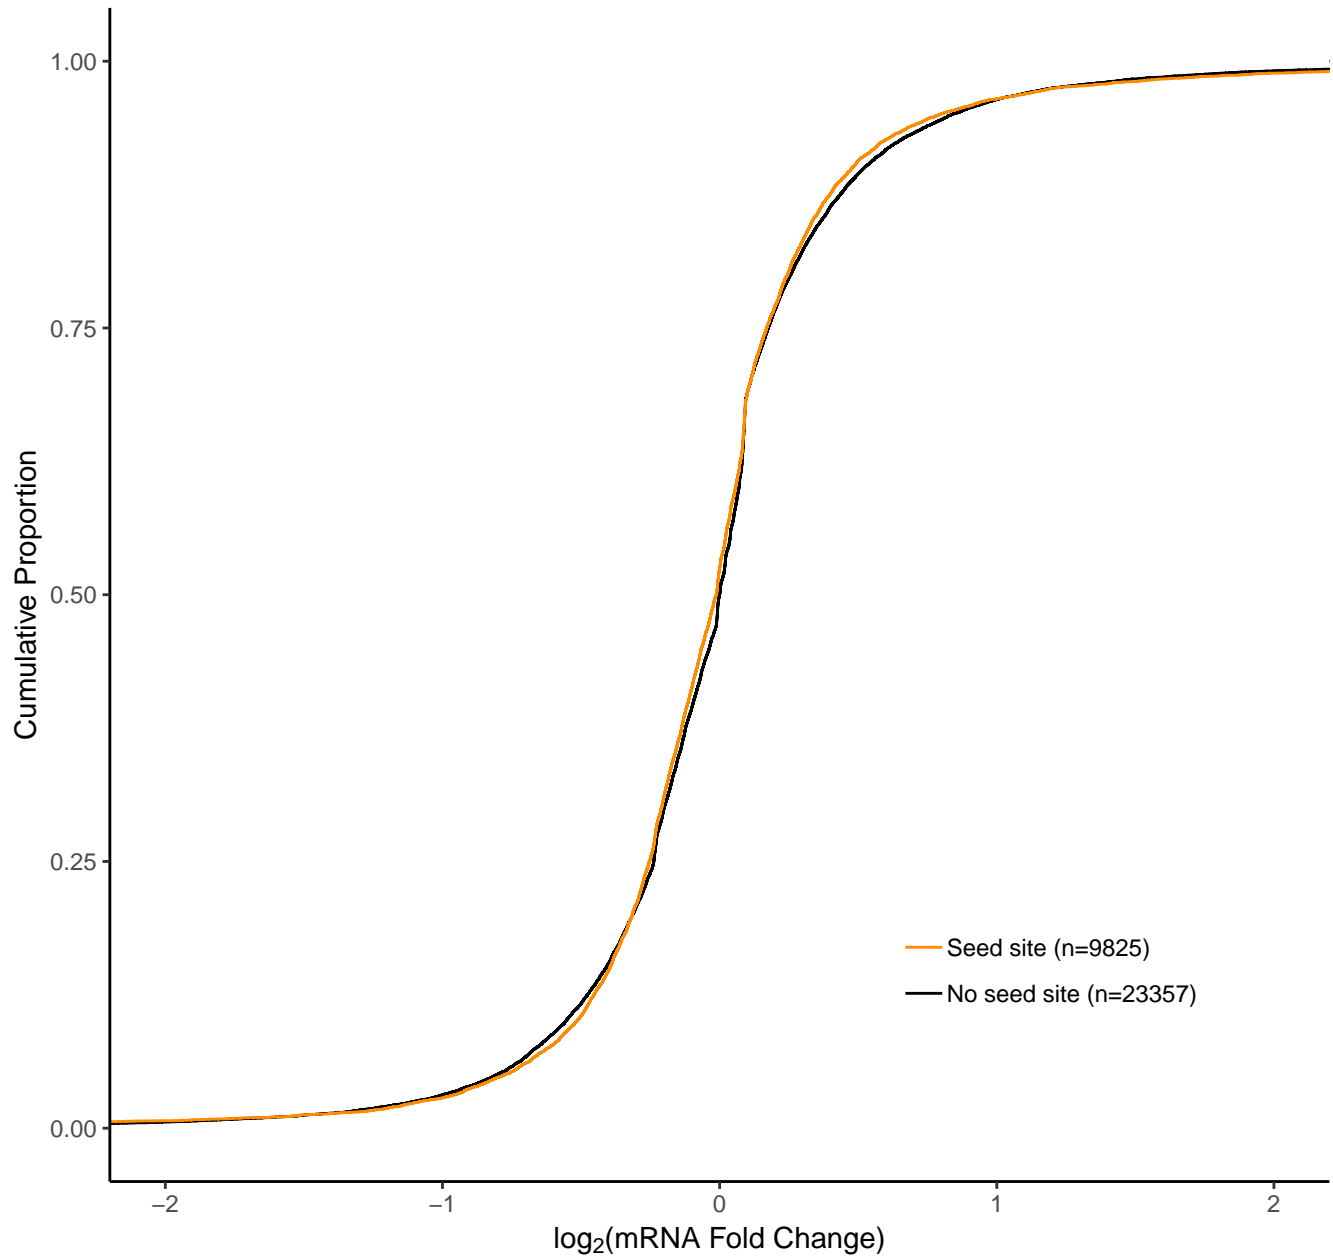

# miR-124-3p transfection (HeLa1)

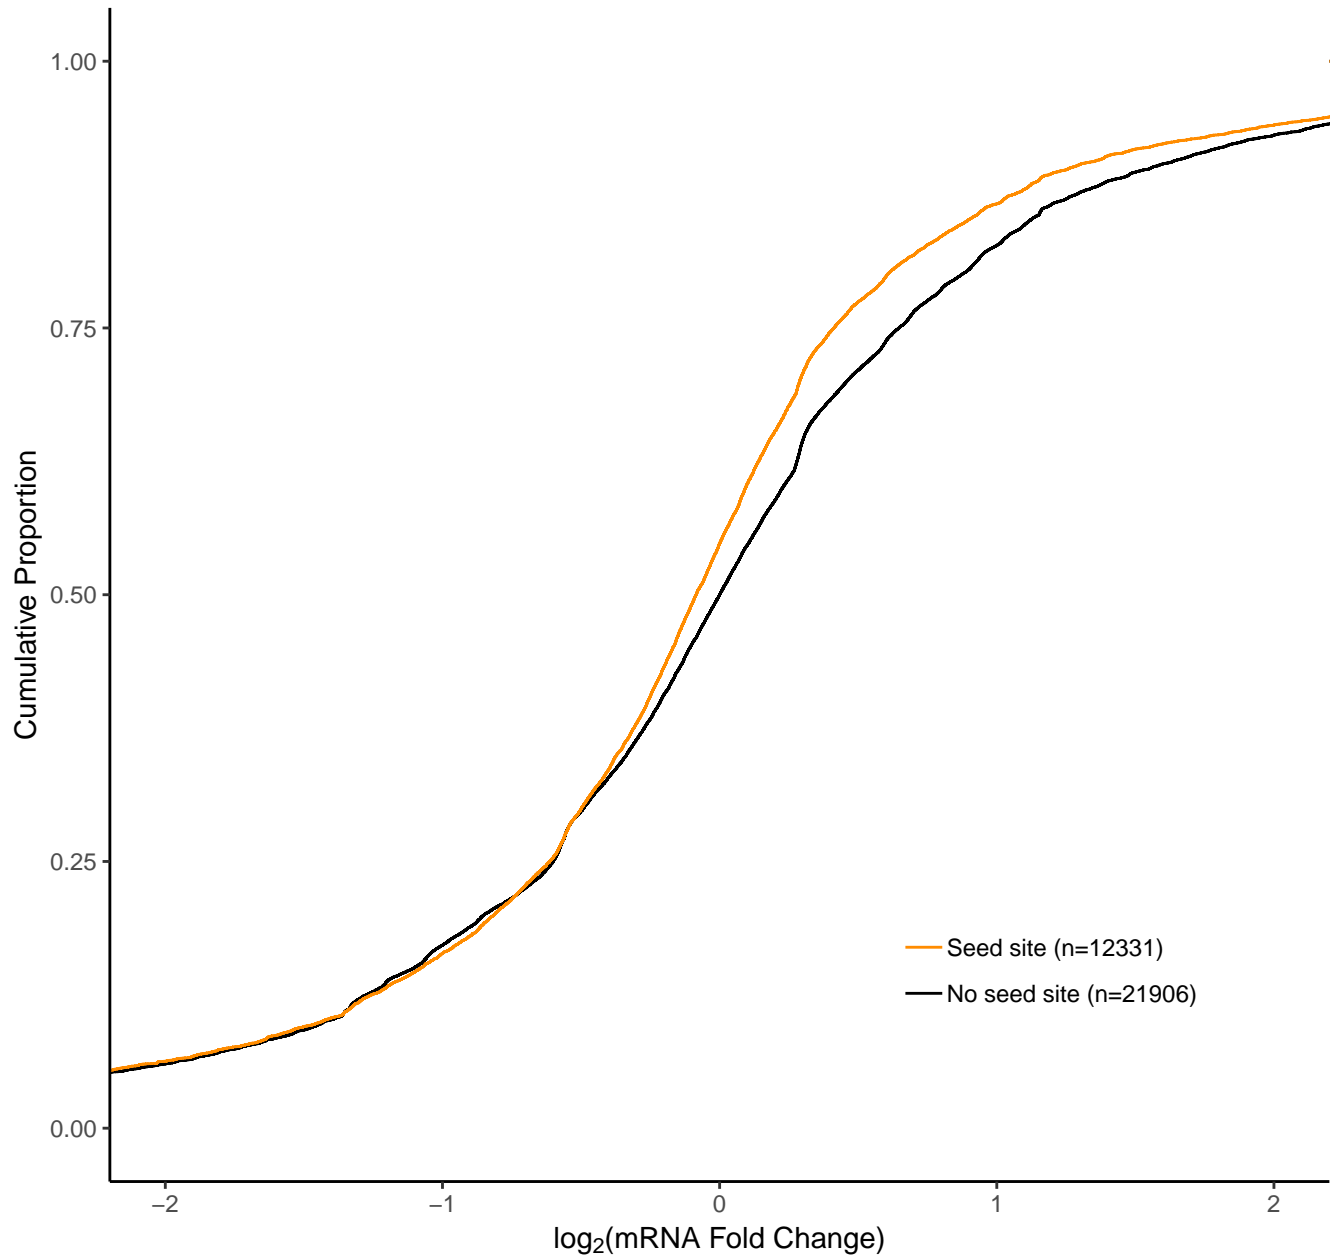

# miR-155-5p transfection (HeLa1)

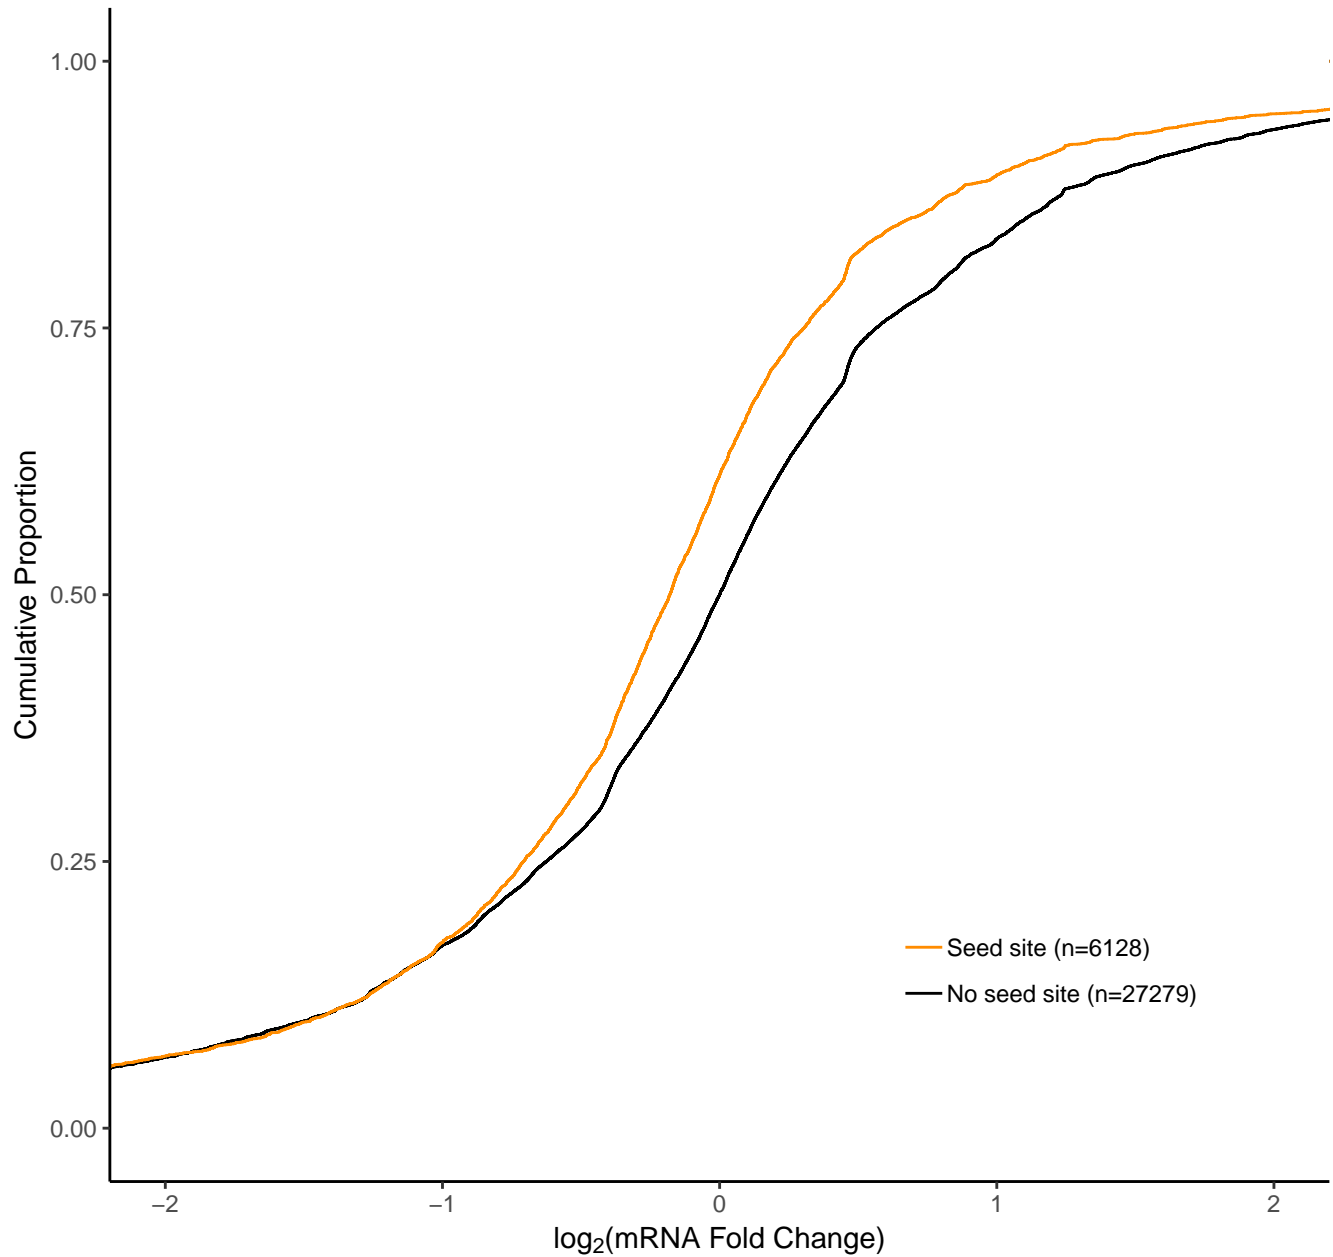

# miR-124-3p transfection (HEK293)

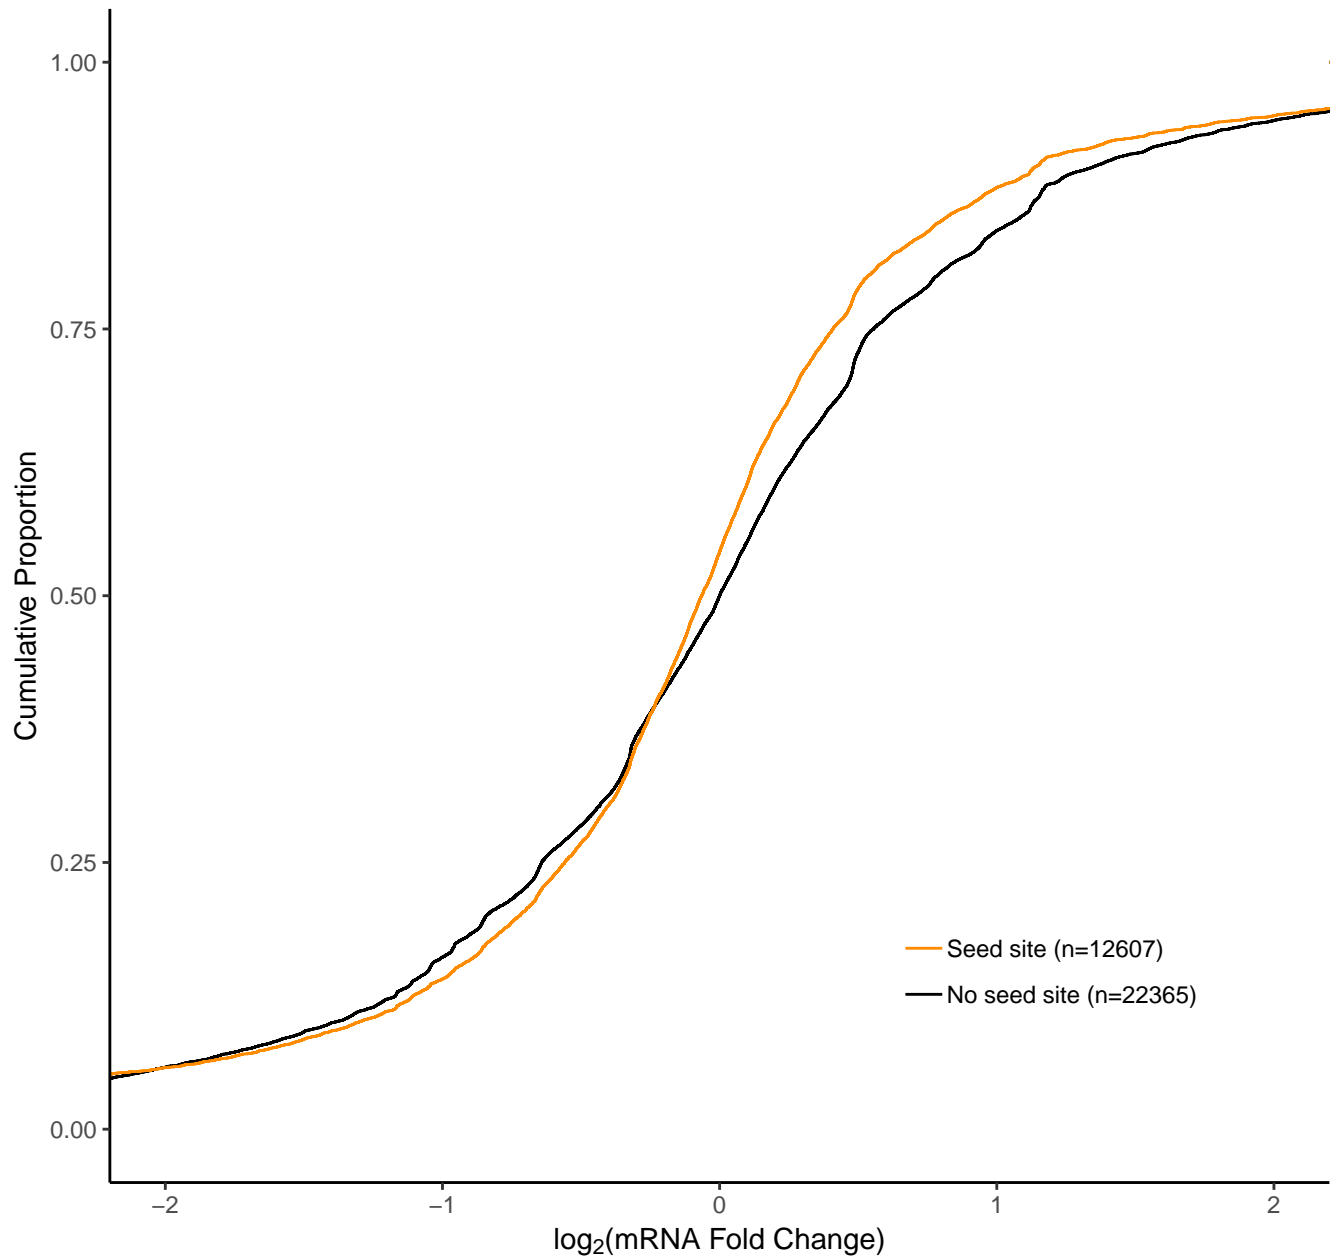

# miR-155-5p transfection (HEK293)

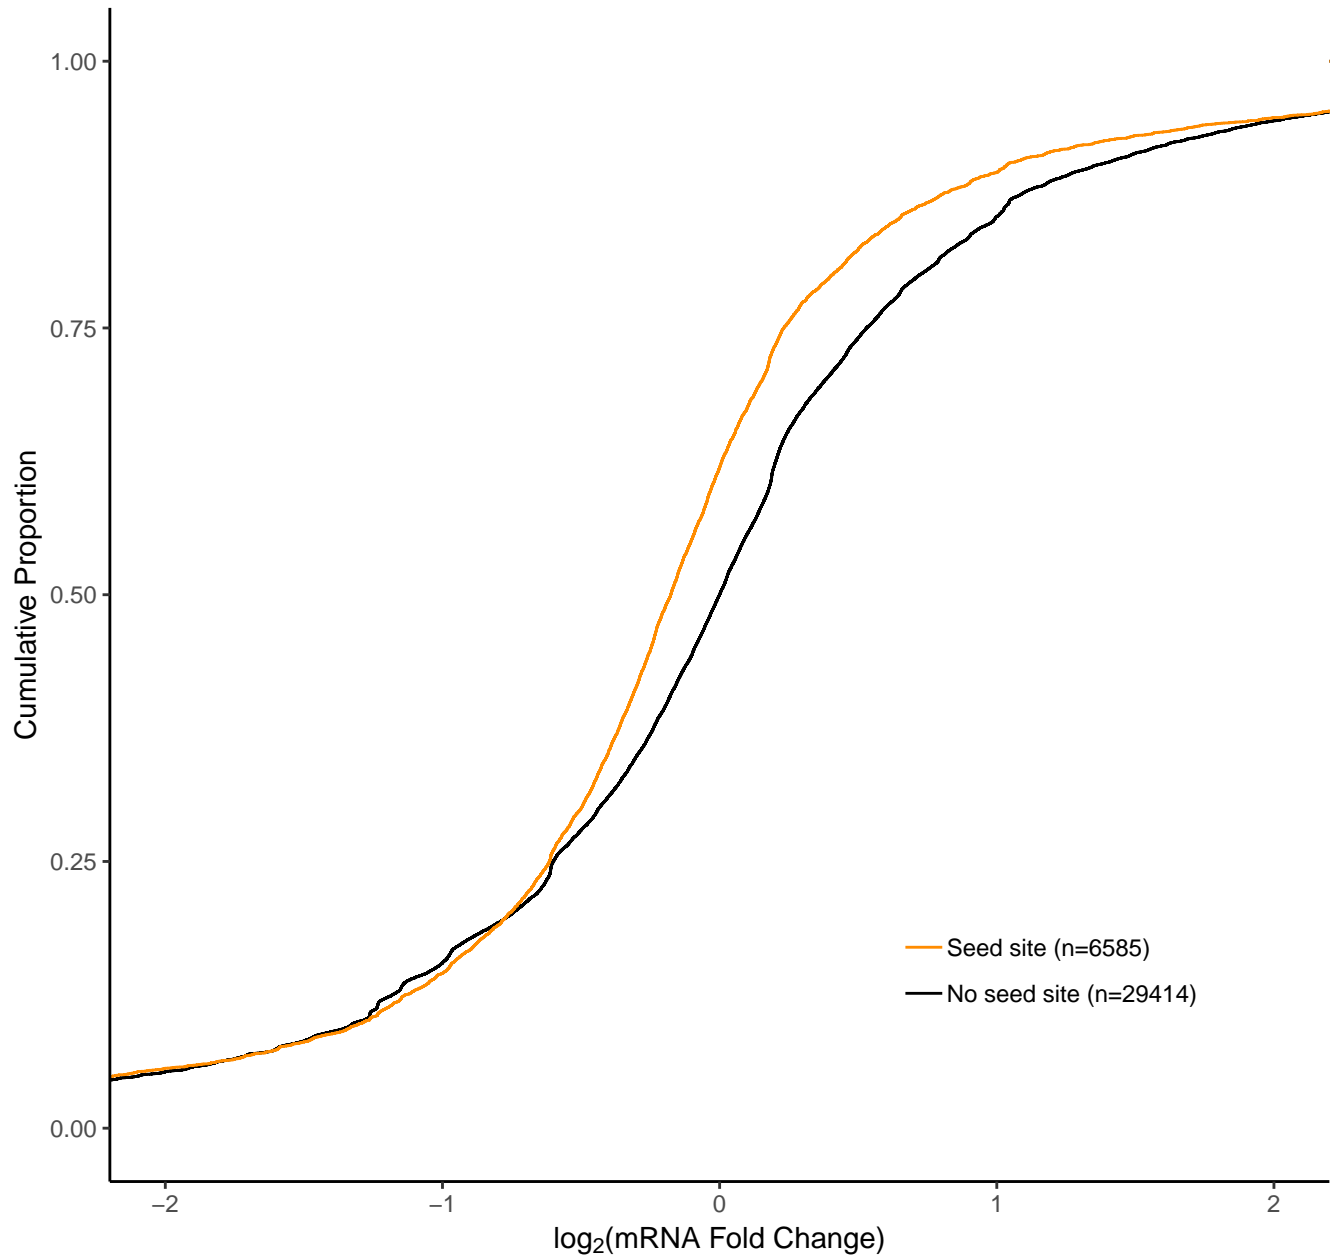



# miR-124-3p transfection (Huh7)

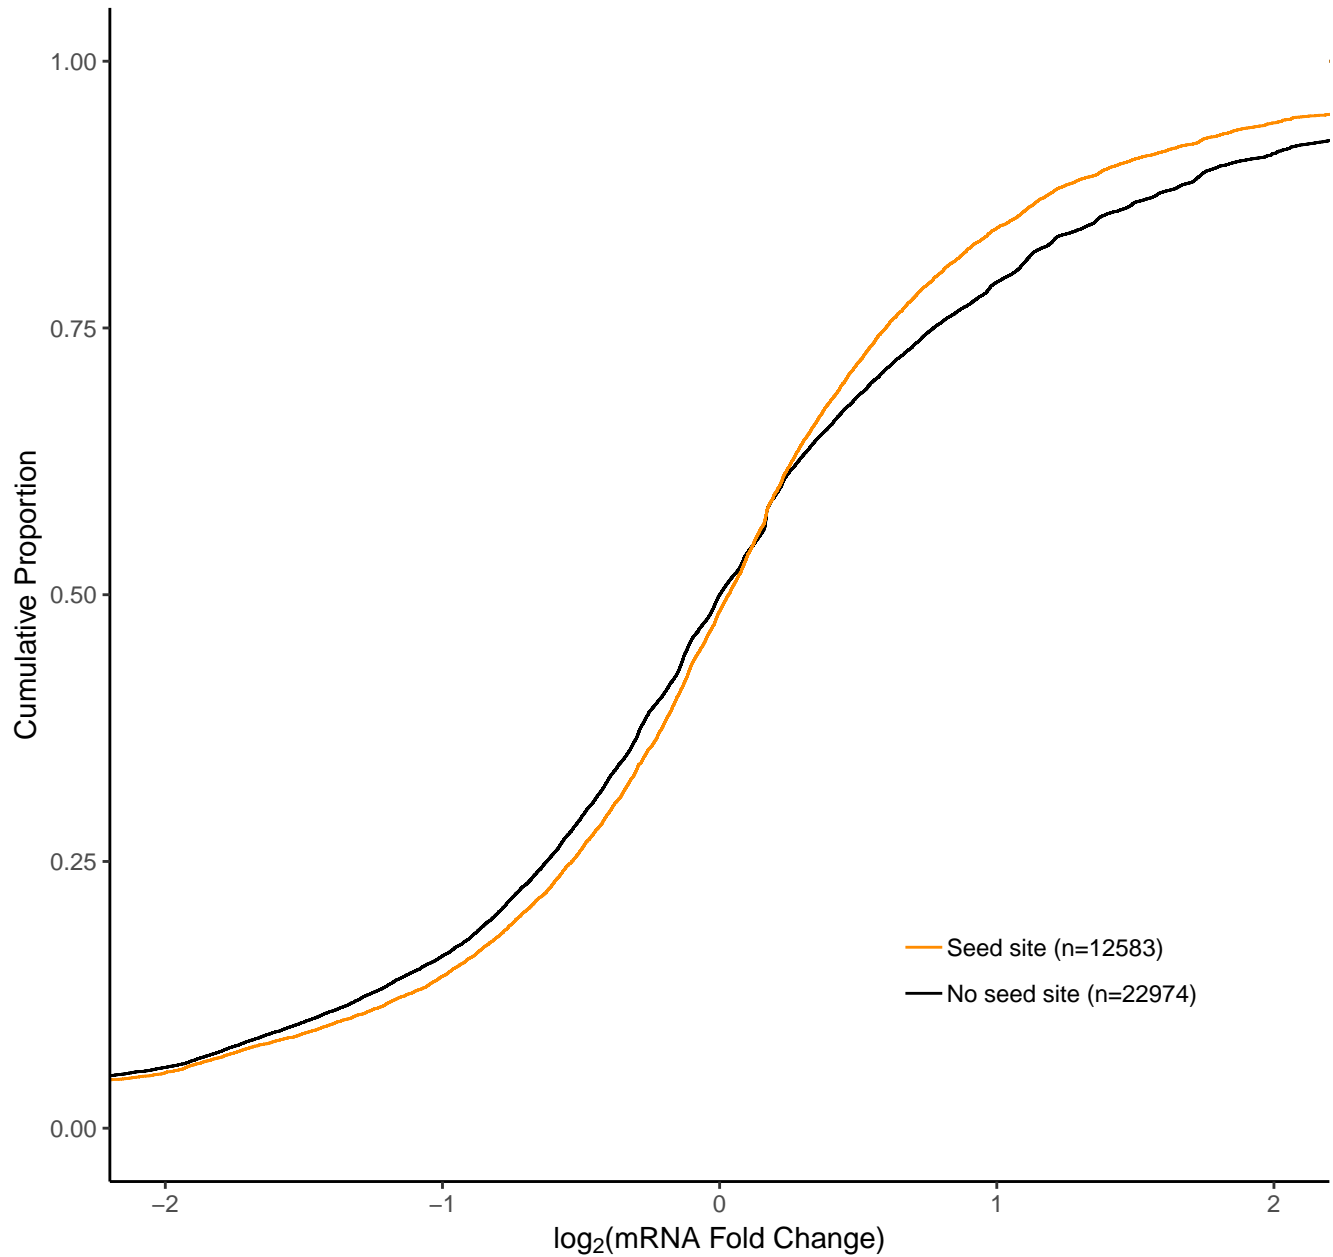

# miR-155-5p transfection (Huh7)

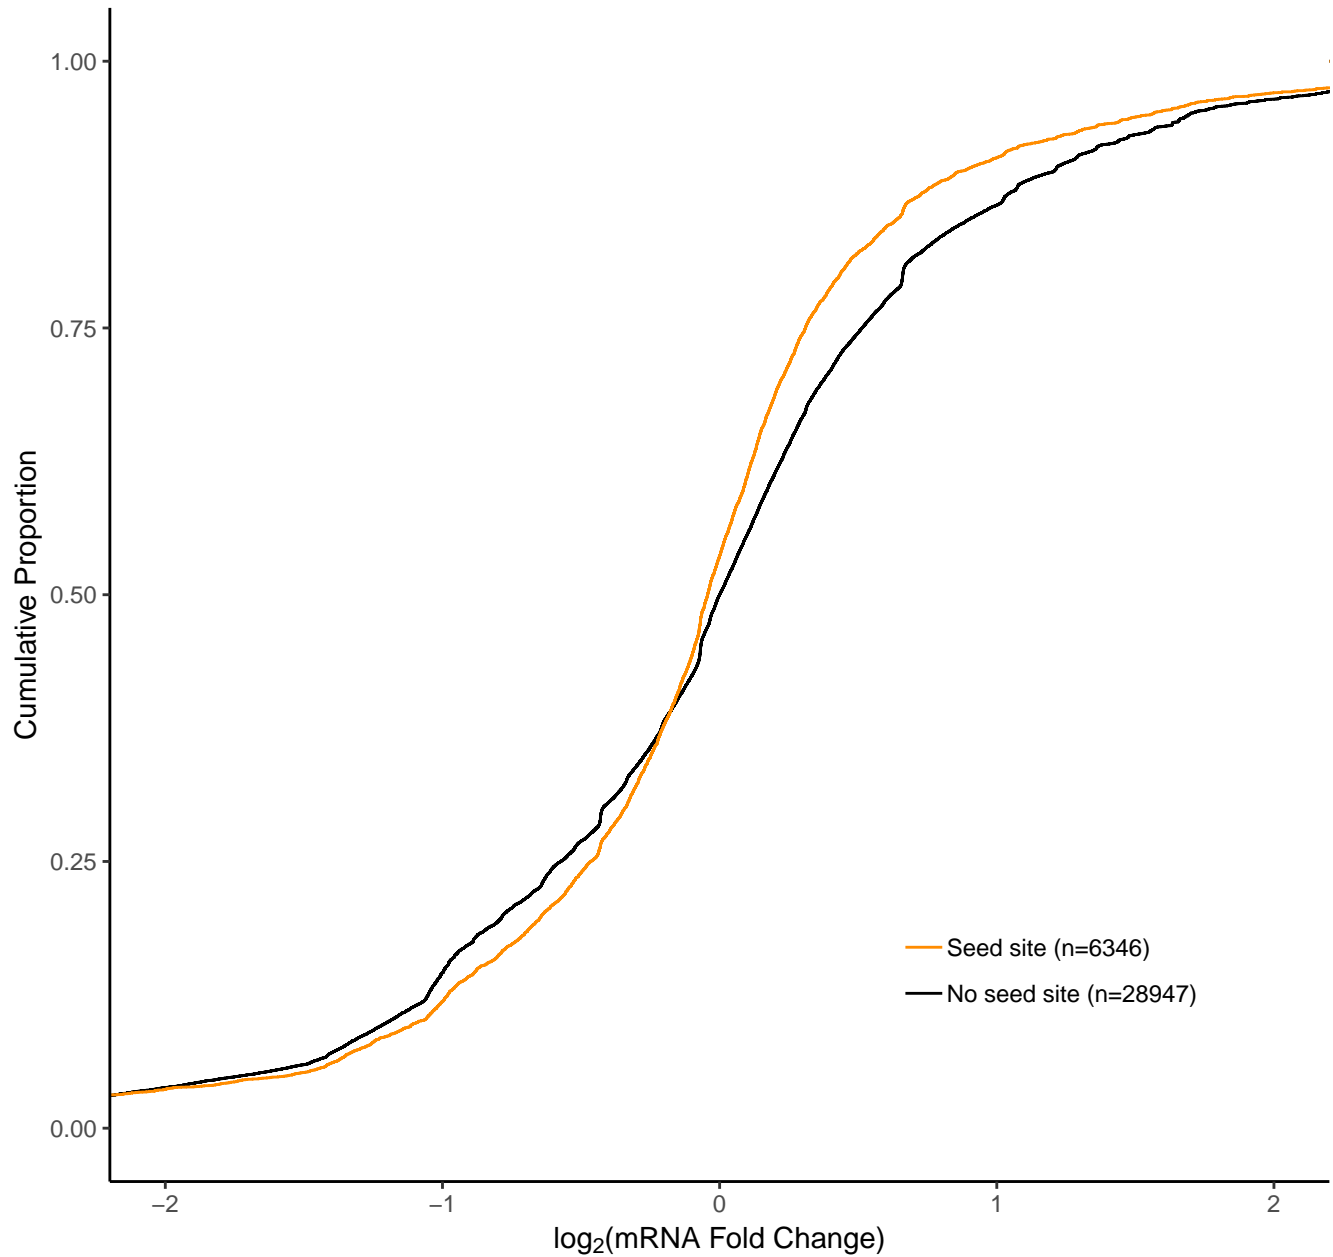

# miR-124-3p transfection (Huh7)



Supplement: Supplementary file [file media-1.pdf]
