# Supplementary material for: FilTar: Using RNA-Seq data to improve microRNA target prediction accuracy in animals
Source: bioRxiv or medRxiv preprint supplement (doi:10.1101/595322), 2019-04-01
Supplement: Supplementary file [file media-2.pdf]

## Known RNA-Seq microRNA transfection datasets not used in the analysis presented in this study

| Species             | BioProject Accession | Source/Study             | Sample | Run Accessions                                                                                      |
|---------------------|----------------------|--------------------------|--------|-----------------------------------------------------------------------------------------------------|
| <i>Homo sapiens</i> | PRJNA229375          | Nam <i>et al.</i> 2014   | HeLa   | SRR1032873,SRR1032874,<br>SRR1032875,SRR1032876,<br>SRR1032877,SRR1032878,                          |
|                     |                      |                          | HEK293 | SRR1032879,SRR1032880,<br>SRR1032881,SRR1032882<br>SRR1032883,SRR1032884                            |
|                     |                      |                          | Huh7   | SRR1032885,SRR1032886,<br>SRR1032887,SRR1032888<br>SRR1032890,SRR1032891,<br>SRR1032892             |
|                     |                      |                          | IMR90  | SRR1032893,SRR1032894,<br>SRR1032895,SRR1032896                                                     |
|                     | PRJNA284262          | Zhang <i>et al.</i> 2016 | HeLa   | SRR2031925,SRR2031926,<br>SRR2031927,SRR2031928                                                     |
|                     | PRJNA271411          | Iyer <i>et al.</i> 2015  | HeLa   | SRR1737410,SRR1737413,<br>SRR1737415,SRR1737416,<br>SRR1737420,SRR1737421,<br>SRR1737429,SRR1737430 |

### References

Nam, J. W., Rissland, O. S., Koppstein, D., Abreu-Goodger, C., Jan, C. H., Agarwal, V., ... & Bartel, D. P. (2014). Global analyses of the effect of different cellular contexts on microRNA targeting. *Molecular cell*, 53(6), 1031-1043.

Zhang, C., Lu, J., Liu, B., Cui, Q., & Wang, Y. (2016). Primate-specific miR-603 is implicated in the risk and pathogenesis of Alzheimer's disease. *Aging (Albany NY)*, 8(2), 272.

Polioudakis, D., Abell, N. S., & Iyer, V. R. (2015). miR-503 represses human cell proliferation and directly targets the oncogene DDHD2 by non-canonical target pairing. *BMC genomics*, 16(1), 40.
