# Supplementary material for: FilTar: Using RNA-Seq data to improve microRNA target prediction accuracy in animals
Source: bioRxiv or medRxiv preprint supplement (doi:10.1101/595322), 2019-04-01

# miR-200b-3p transfection (NMuMG)

$p \approx 0.00307$

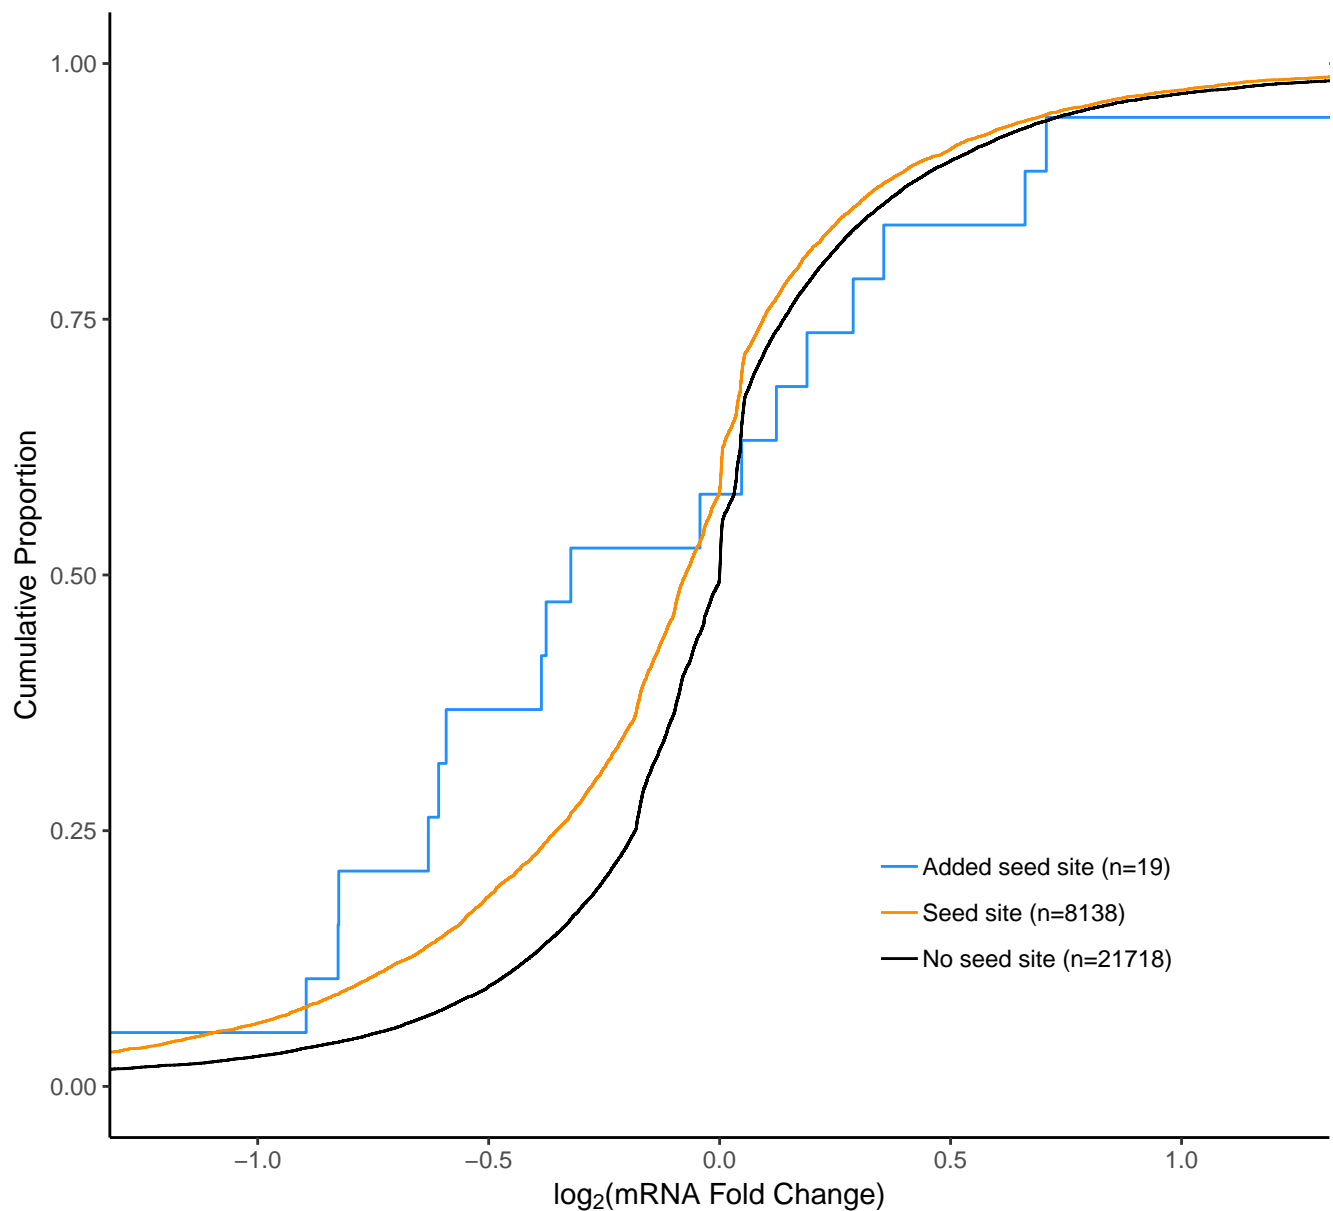

# miR-429-3p transfection (NMuMG)

$p \approx 0.00294$

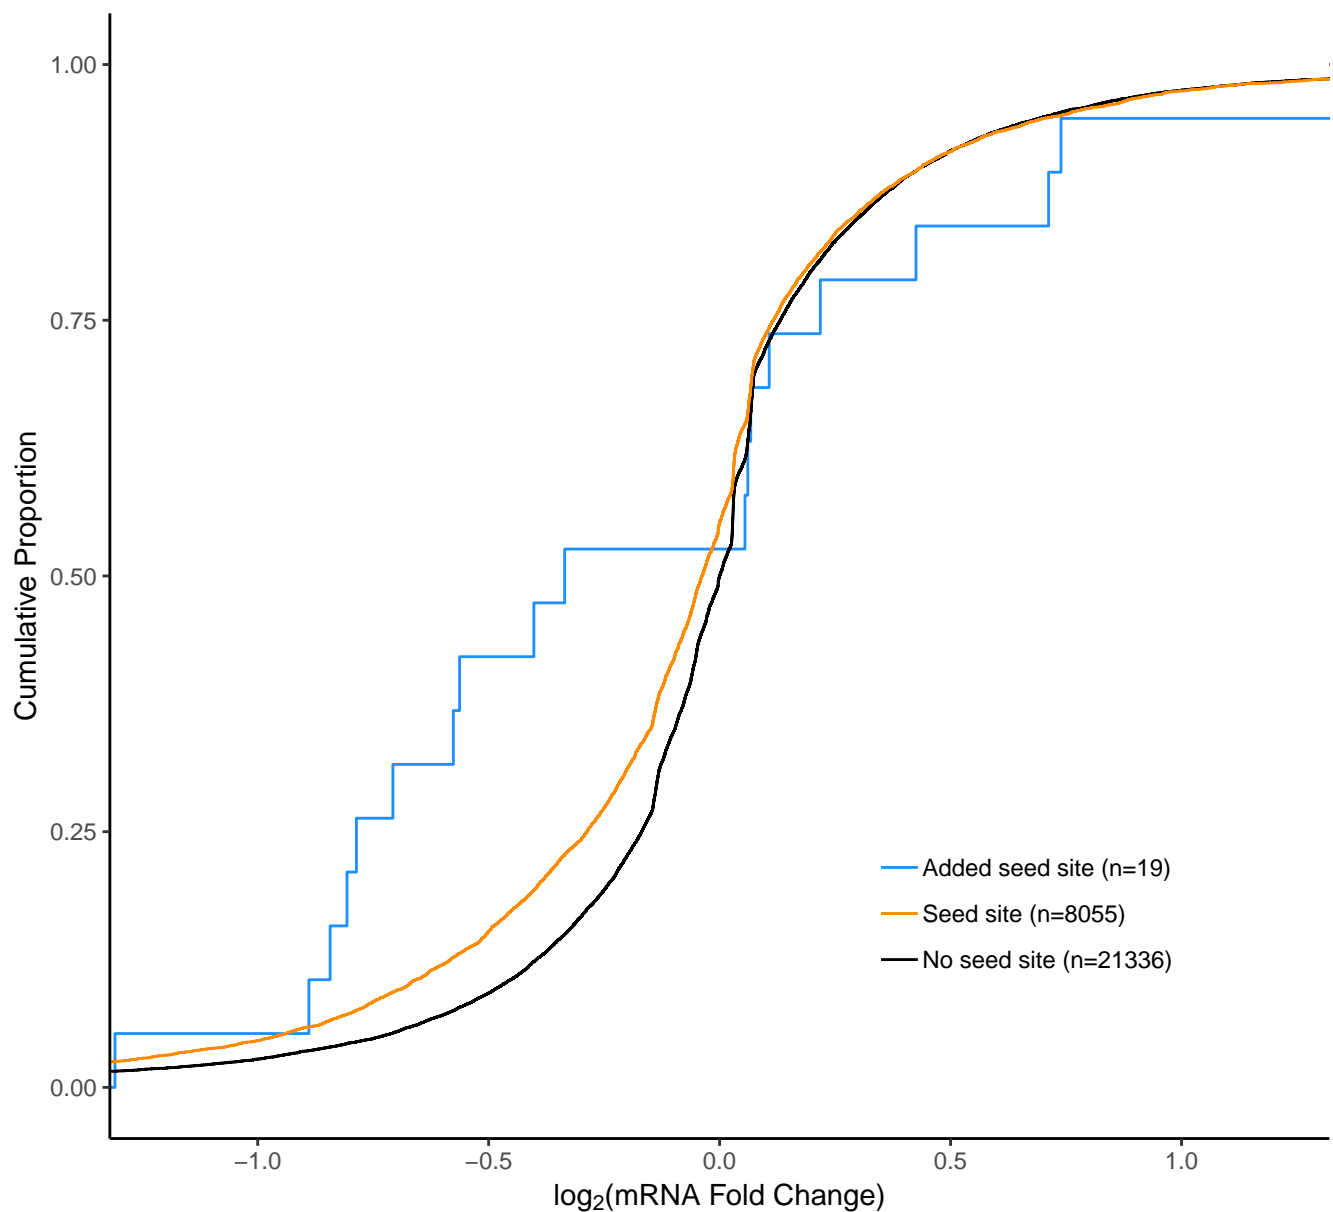

# miR-107 transfection (HeLa)

$\rho \approx 0.954$

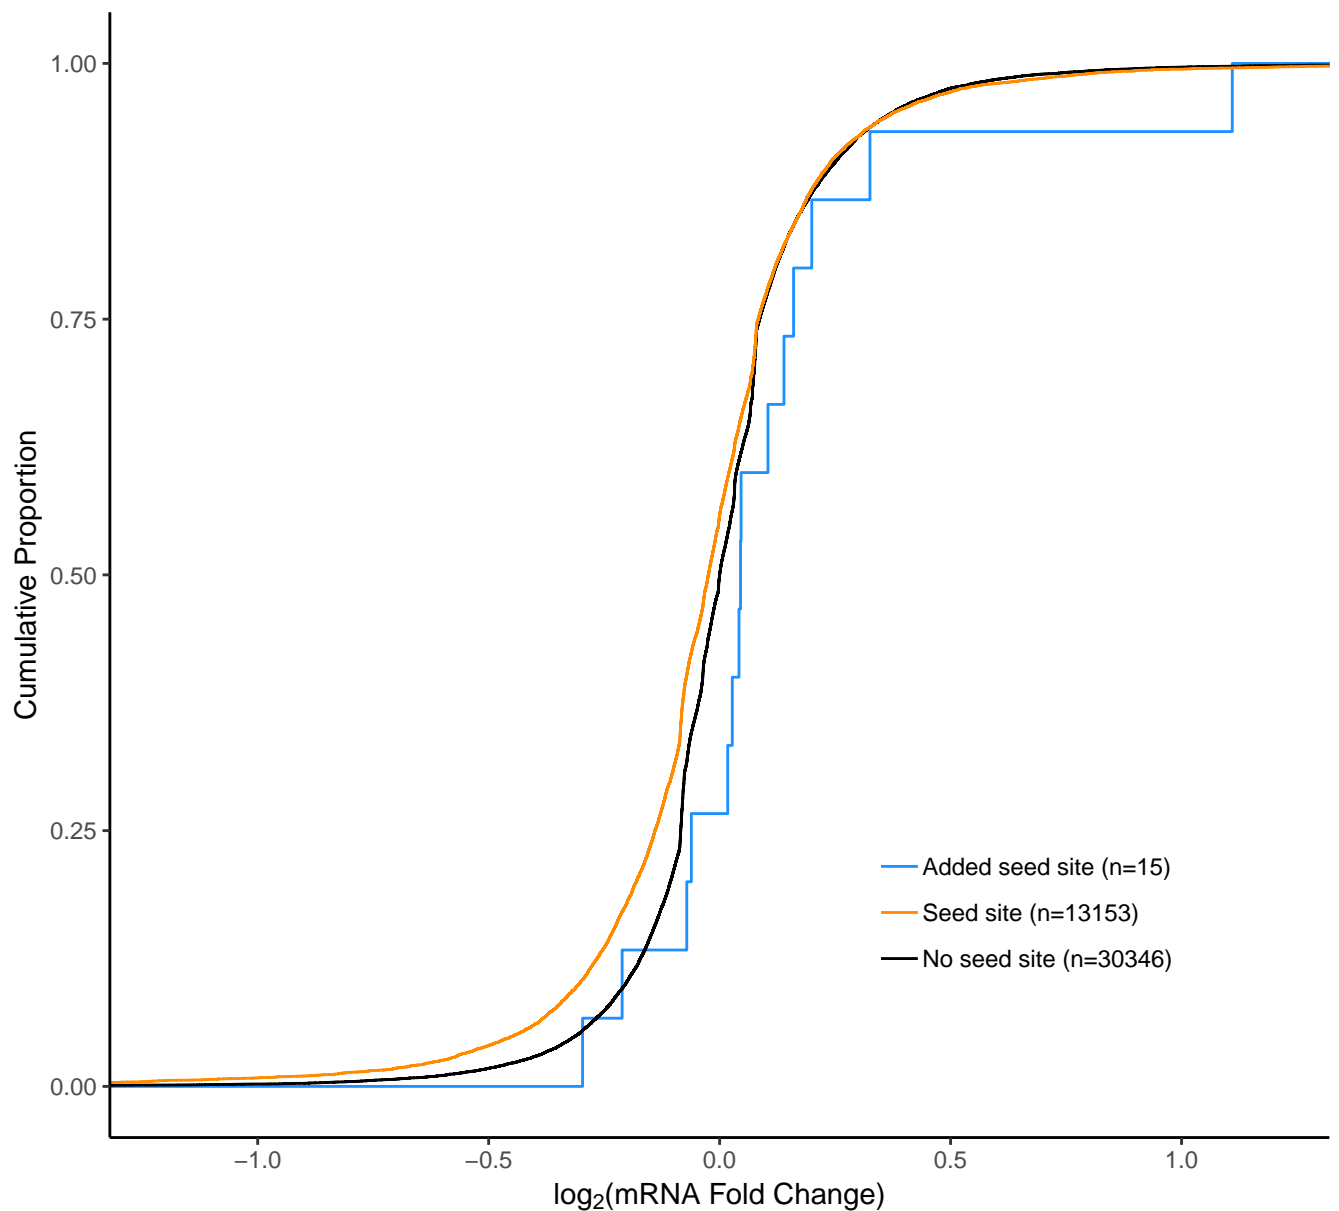

# miR-10a-5p transfection (HeLa)

$\rho \approx 0.995$

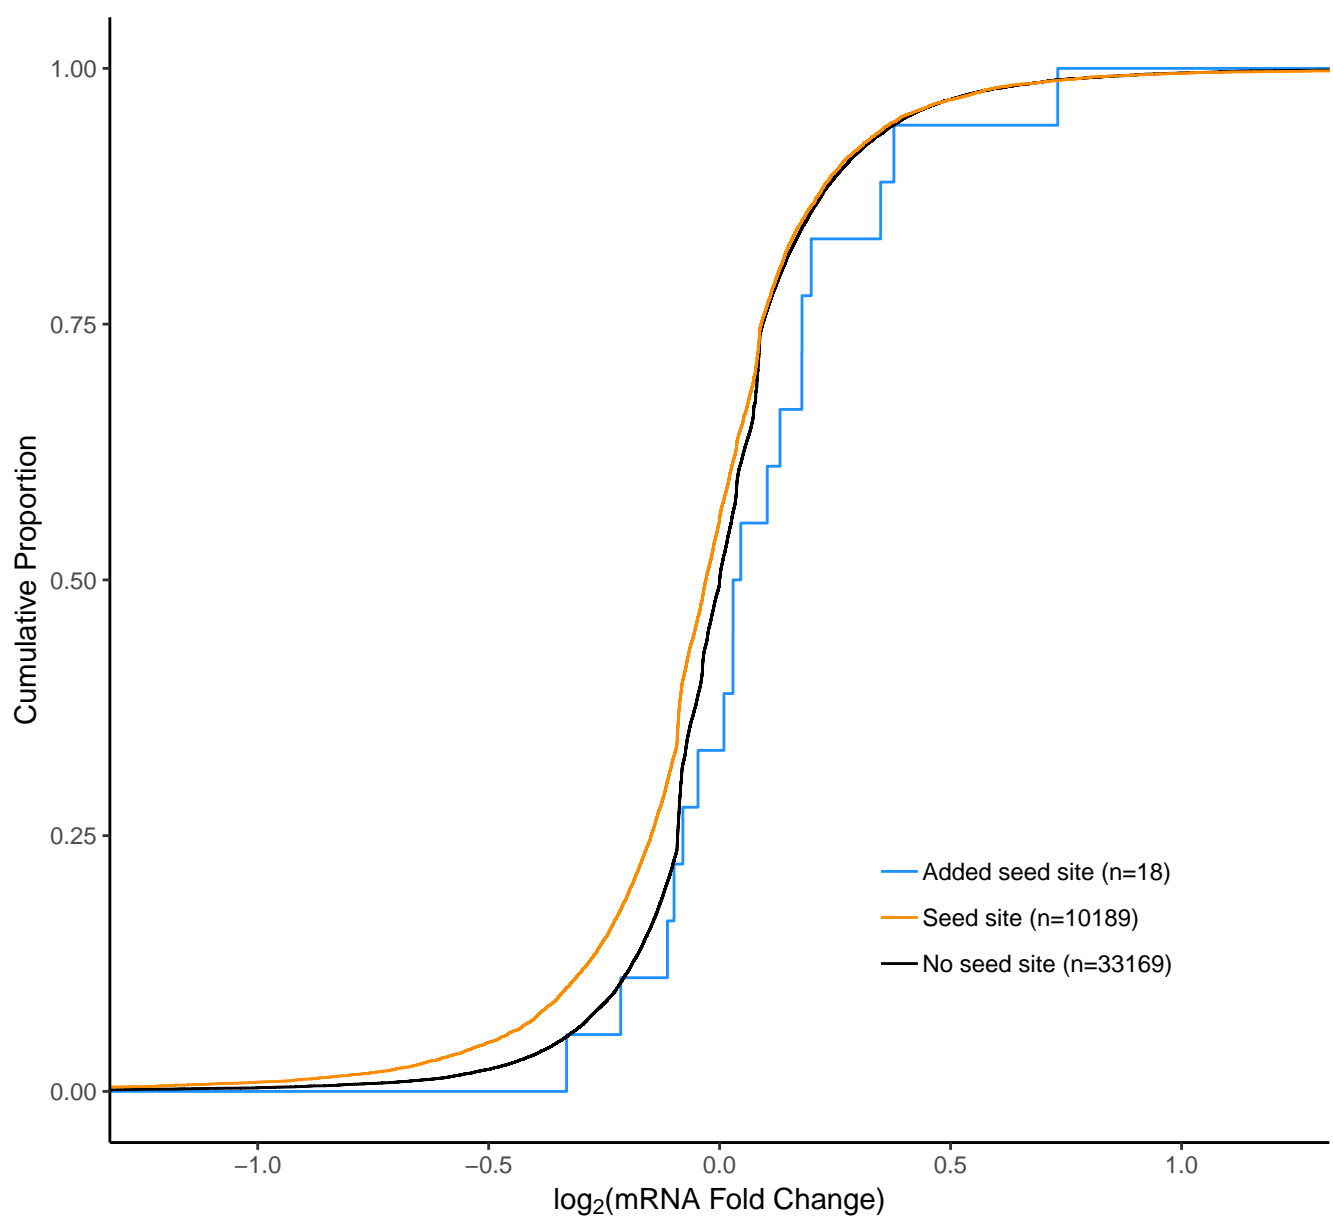

# miR-15a-5p transfection (HeLa)

$p \approx 0.0493$

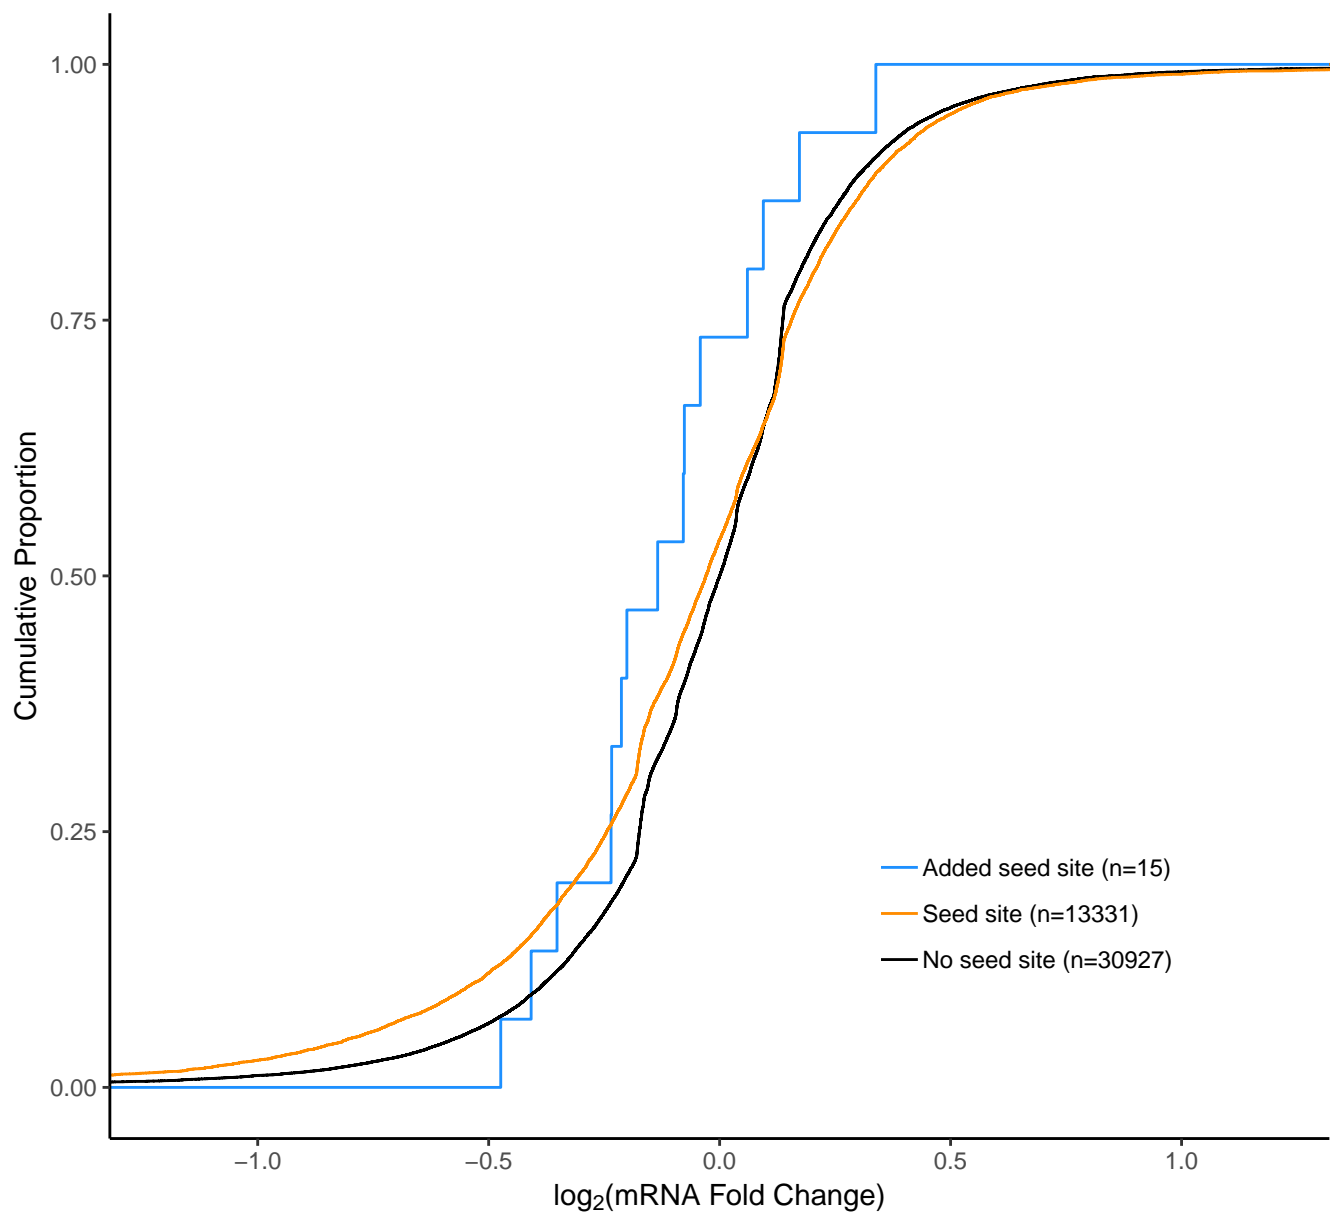

Supplement: Supplementary file [file media-5.pdf]
